# Supplementary material
Source: PubMed Central journal article supplement (PMC5349368)
Supplement: UEG684695_supplementary_material1.pdf [file UEG684695_supplementary_material1.pdf]

## Supplement to HaPanEU – UEG evidence-based guidelines for the diagnosis and therapy of chronic pancreatitis

---

### List of Abbreviations

|                        |                                                                 |
|------------------------|-----------------------------------------------------------------|
| ADA                    | American Diabetes Association                                   |
| AGA                    | American Gastroenterological Association                        |
| AIP                    | Autoimmune pancreatitis                                         |
| ALP                    | Alkaline phosphatase                                            |
| APA                    | American Pancreas Association                                   |
| BMD                    | Bone mineral density                                            |
| BMI                    | Body mass index                                                 |
| BS                     | Biliary stricture                                               |
| CBD                    | Common bile duct                                                |
| CCK                    | Cholecystokinin                                                 |
| CEA                    | Carcinoembryonic antigen                                        |
| CEH-EUS                | Contrast-enhanced harmonic EUS                                  |
| CEL                    | Carboxyesterlipase                                              |
| CEUS                   | Contrast-enhanced EUS                                           |
| CFA                    | Coefficient of fat absorption                                   |
| CFTR                   | Cystic fibrosis transmembrane conductance regulator             |
| CI                     | Confidence interval                                             |
| <sup>13</sup> C-MTG-BT | <sup>13</sup> C mixed triglyceride breath test                  |
| CP                     | Chronic pancreatitis                                            |
| CPA1                   | Carboxypeptidase A1                                             |
| CT                     | Computed tomography                                             |
| CTRC                   | Chymotrypsin C                                                  |
| DF                     | Duodenal filling                                                |
| DPPHR                  | Duodenum-preserving pancreatic head resection                   |
| DXA                    | Dual energy X-ray absorptiometry                                |
| EMA                    | European Medicines Agency                                       |
| ENSP                   | European Network for Smoking and Tobacco Prevention             |
| EORTC                  | European Organization for the Research and Treatment of Cancer  |
| EPC                    | European Pancreas Club                                          |
| ERCP                   | Endoscopic retrograde cholangiopancreatography                  |
| ESGE                   | European Society of Gastrointestinal Endoscopy                  |
| ESPEN                  | European Society of Clinical Nutrition and Metabolism           |
| ESWL                   | Extracorporeal shock wave lithotripsy                           |
| ERP                    | Endoscopic retrograde pancreatography                           |
| ET                     | Endoscopic therapy                                              |
| EUS                    | Endoscopic ultrasound                                           |
| FC-SEMS                | Fully-covered self-expandable metallic stent                    |
| FDA                    | Food and Drug Administration                                    |
| FFMI                   | Fat-free mass index                                             |
| FE-1                   | Fecal elastase-1                                                |
| FPG                    | Fasting plasma glucose                                          |
| FIP                    | Fédération Internationale Pharmaceutique                        |
| GEL                    | granulocytic epithelial lesions                                 |
| GQLI                   | Gastrointestinal Quality of Life Index                          |
| GRADE                  | Grading of Recommendations Assessment, Development & Evaluation |
| HaPanEU                | Harmonizing Pancreatitis across Europe                          |

|           |                                                     |
|-----------|-----------------------------------------------------|
| IAP       | International Association of Pancreatology          |
| IDCP      | Idiopathic duct centric pancreatitis                |
| IDDM      | Insulin-dependent diabetes mellitus                 |
| IM        | Intramuscular                                       |
| IPMN      | Intraductal papillary mucinous neoplasm             |
| IV        | Intravenous                                         |
| LPSP      | Lymphoplasmocytic sclerosing pancreatitis           |
| MCN       | Mucinous cystic neoplasm                            |
| MCS       | Mental component score                              |
| MCT       | Medium chain triglyceride                           |
| MDCT      | Multidetector-row computed tomography               |
| MPD       | Main pancreatic duct                                |
| MRCP      | Magnetic resonance cholangiopancreatography         |
| MRI       | Magnetic resonance imaging                          |
| MUST      | Malnutrition universal screening tool               |
| NAPS2     | North American Pancreatitis Study 2                 |
| NCCT      | Non-contrast enhanced computed tomography           |
| NIDDM     | Non-IDDM                                            |
| NRS-2002  | Nutritional risk screening 2002                     |
| NSAID     | Non-steroidal anti-inflammatory drug                |
| OGTT      | Oral glucose tolerance test                         |
| OR        | Odds ratio                                          |
| PD        | Pancreatoduodenectomy                               |
| PEI       | Pancreatic exocrine insufficiency                   |
| PERT      | Pancreatic enzyme replacement therapy               |
| PFT       | Pancreatic function test                            |
| PhEur     | European Pharmacopoeia                              |
| PHPT      | Primary hyperparathyroidism                         |
| PPI       | Proton pump inhibitor                               |
| PRSS1 & 2 | Cationic trypsinogen genes 1 & 2                    |
| QUADAS    | Quality Assessment of Diagnostic Accuracy Studies   |
| QoL       | Quality of Life                                     |
| RCT       | Randomized controlled trial                         |
| SEMS      | Self-expandable metallic stent                      |
| SGLT-2    | Sodium glucose co-transporter-2                     |
| s-MRCP    | Secretin-stimulated MRCP                            |
| SNP       | Single nucleotide polymorphism                      |
| SPINK1    | Serine protease inhibitor Kazal type 1              |
| SR        | Systematic review                                   |
| T3cDM     | Type 3 diabetes mellitus                            |
| TED       | Test and Evaluation Directorate                     |
| TM        | Transmural                                          |
| TP        | Transpapillary                                      |
| TPIAT     | Total pancreatectomy with islet autotransplantation |
| UEG       | United European Gastroenterology                    |
| USP       | United States Pharmacopeia                          |
| VAS       | Visual analog scale                                 |
| WOPN      | Walled-off pancreatic necrosis                      |
| WHO       | World Health Organization                           |

## **GRADE system**

<http://www.uptodate.com/home/about/tutorial/index.html> (30 min tutorial)

<http://www.uptodate.com/home/about/policies/grade.html>

### **GRADE system: Step 1, grade the evidence**

A= high quality evidence

B= moderate quality evidence

C= poor quality evidence

If RCTs, start by assuming high quality (grade A), but then grade down for:

- Serious methodologic limitations
- Indirectness in population, intervention, or outcome
- Inconsistent results
- Imprecision in estimates
- High likelihood of publication bias

If no RCTs, start by assuming low quality (grade C), but then grade up for:

- Large, or very large treatment effects
- All plausible biases that would diminish the effect of the intervention
- Dose-response gradient

### **GRADE system: Step 2, grade the recommendation**

1= strong recommendation

2= weak recommendation

**Table S1:** Narratives detailing the evidence and grade of recommendations

| <b>Grade of Recommendation</b>                                     | <b>Clarity of risk/benefit</b>                                                                                         | <b>Quality of supporting evidence</b>                                                                                                                                                                                                                                                                                             | <b>Implications</b>                                                                                         |
|--------------------------------------------------------------------|------------------------------------------------------------------------------------------------------------------------|-----------------------------------------------------------------------------------------------------------------------------------------------------------------------------------------------------------------------------------------------------------------------------------------------------------------------------------|-------------------------------------------------------------------------------------------------------------|
| <b>1A.</b><br>Strong recommendation.<br>High quality evidence.     | Benefits clearly outweigh risk and burdens, or vice versa.                                                             | Consistent evidence from well-performed RCTs or overwhelming evidence in some other form. Further research is unlikely to change our confidence in estimating benefit and risk.                                                                                                                                                   | Strong recommendation, can apply to most patients in most circumstances without reservation.                |
| <b>1B.</b><br>Strong recommendation.<br>Moderate quality evidence. | Benefits clearly outweigh risk and burdens, or vice versa.                                                             | Evidence from RCTs with important limitations (inconsistent results, methodological flaws, indirect or imprecise), or very strong evidence in some other form. Further research (if performed) is likely to have an impact on our confidence in estimating benefit and risk and may change the estimate.                          | Strong recommendation, likely to apply to most patients.                                                    |
| <b>1C.</b><br>Strong recommendation.<br>Low quality evidence.      | Benefits appear to outweigh risk and burdens, or vice versa.                                                           | Evidence from observational studies, unsystematic clinical experience, or from RCTs with serious flaws. Any estimate of effect is uncertain.                                                                                                                                                                                      | Relatively strong recommendation; might change when higher quality evidence becomes available.              |
| <b>2A.</b><br>Weak recommendation.<br>High quality evidence.       | Benefits closely balanced with risks and burdens                                                                       | Consistent evidence from well performed RCTs or overwhelming evidence in some other form. Further research is unlikely to change our confidence in the estimate of benefit and risk.                                                                                                                                              | Weak recommendation, best action may differ depending on circumstances or patients or social values.        |
| <b>2B.</b><br>Weak recommendation.<br>Moderate quality evidence.   | Benefits closely balanced with risks and burdens, some uncertainly in the estimates of benefits, risks and burdens     | Evidence from randomized, controlled trials with important limitations (inconsistent results, methodological flaws, indirect or imprecise), or very strong evidence in some other form. Further research (if performed) is likely to have an impact on our confidence in estimating benefit and risk and may change the estimate. | Weak recommendation, alternative approaches likely to be better for some patients under some circumstances. |
| <b>2C.</b><br>Weak recommendation.<br>Low quality evidence.        | Uncertainty in the estimates of benefits, risks, and burdens; benefits may be closely balanced with risks and burdens. | Evidence from observational studies, unsystematic clinical experience, or from RCTs with serious flaws. Any estimate of effect is uncertain.                                                                                                                                                                                      | Very weak recommendation; other alternatives may be equally reasonable.                                     |

Note: the abovementioned guideline for grading evidence is specifically directed at therapeutic studies. For studies on diagnostic accuracy, the GRADE system suggests different criteria. Valid diagnostic accuracy studies – cross-sectional or cohort studies in patients with diagnostic uncertainty and direct comparison of test results with an appropriate reference standard – provide high quality evidence. However, they often are downgraded to lower quality evidence based on an assessment of limitations, particularly indirectness of outcomes, i.e. uncertainty about the link between the test accuracy and outcomes that are important to patients, inconsistency, imprecision and publication bias. For background and specific instructions on the GRADE system in evaluating diagnostic questions, see Schünemann, et al. (1).

**Table S2\*:** Estimated overall sensitivity, specificity, and heterogeneity per imaging modality

| <b>Modality</b> | <b>No. of studies</b> | <b>No. of patients</b> | <b>Sensitivity (95%CI)</b> | <b>Specificity (95%CI)</b> | <b>Heterogeneity (I<sup>2</sup>)</b> |
|-----------------|-----------------------|------------------------|----------------------------|----------------------------|--------------------------------------|
| <b>EUS</b>      | 15                    | 1181                   | 82% (71%-90%)              | 91% (83%-95%)              | 82% / 75%                            |
| <b>MRCP</b>     | 14                    | 933                    | 78% (69%-85%)              | 96% (90%-98%)              | 59% / 65%                            |
| <b>ERCP</b>     | 11                    | 742                    | 82% (76%-87%)              | 94% (87%-98%)              | 39% / 67%                            |
| <b>CT</b>       | 10                    | 700                    | 75% (66%-83%)              | 91% (81%-96%)              | 50% / 71%                            |
| <b>US</b>       | 10                    | 1005                   | 67% (53%-78%)              | 98% (89%-100%)             | 40% / 93%                            |

Random effects model. \*from (2)

**Table S3\*:** Head-to-head comparison of imaging modalities

| Comparison              | No. of studies | No. of patients | Modality     | Sensitivity (95% CI) | Specificity (95% CI) |
|-------------------------|----------------|-----------------|--------------|----------------------|----------------------|
| <b>US vs ERCP**</b>     | 6              | 423             | <b>US</b>    | 57% (49%–65%)        | 94% (74%–99%)        |
|                         |                |                 | <b>ERCP</b>  | 78% (71%–85%)        | 98% (89%–100%)       |
| <b>US vs CT***</b>      | 5              | 297             | <b>US</b>    | 58% (49%–66%)        | 77% (71%–83%)        |
|                         |                |                 | <b>CT</b>    | 77% (68%–83%)        | 82% (74%–88%)        |
| <b>CT vs ERCP***</b>    | 5              | 354             | <b>CT</b>    | 75% (67%–82%)        | 86% (81%–90%)        |
|                         |                |                 | <b>ERCP</b>  | 84% (77%–89%)        | 90% (85%–93%)        |
| <b>EUS vs ERCP***</b>   | 3              | 214             | <b>EUS</b>   | 88% (80%–93%)        | 85% (76%–91%)        |
|                         |                |                 | <b>ERCP</b>  | 86% (78%–91%)        | 92% (85%–96%)        |
| <b>MRCP vs sMRCP***</b> | 3              | 226             | <b>MRCP</b>  | 62% (49%–73%)        | 94% (89%–97%)        |
|                         |                |                 | <b>sMRCP</b> | 68% (56%–79%)        | 91% (85%–94%)        |
| <b>EUS vs US***</b>     | 2              | 95              | <b>EUS</b>   | 90% (82%–98%)        | 100%                 |
|                         |                |                 | <b>US</b>    | 63% (49%–76%)        | 91% (82%–99%)        |

\*from (2); \*\*Random effects model; \*\*\*Fixed effects model

**Sensitivity:** US vs ERCP ( $p < 0.001$ ), US vs CT ( $p = 0.002$ ), EUS vs US ( $p = 0.001$ )

**Specificity:** US vs ERCP ( $p = 0.003$ ), EUS vs US ( $p = 0.04$ )

**Table S4:** Characteristics of studies and results of Roux-en-Y pancreaticojejunostomy

| Author (ref)                 | Year | Study design | No. of patients | WJ only<br>WJ+Frey<br>Frey only | Perioperative Mortality (%) | Mean Follow-up (months) | Pain relief (complete or partial) |
|------------------------------|------|--------------|-----------------|---------------------------------|-----------------------------|-------------------------|-----------------------------------|
| Delcore et al. (3)           | 1994 | retro        | 28              | WJ                              | 0%                          | 42                      | 86%                               |
| Adams et al.                 | 1994 | retro        | 85              | WJ                              | 0%                          | 76                      | 68%                               |
| Hakaim et al. (22)           | 1994 | retro        | 23              | WJ                              | 0%                          | 62                      | 60%                               |
| Frey et al. (6)              | 1994 | retro        | 50              | Frey                            | 0%                          | 37                      | 87%                               |
| Sielezneff et al. (23)       | 2000 | retro        | 57              | WJ                              | 0%                          | 65                      | 84%                               |
| Sakorafas et al. (24)        | 2000 | retro        | 120             | WJ                              | 0%                          | 96                      | 81%                               |
| Paye et al. (25)             | 2001 | retro        | 37              | WJ+Frey                         | 2.7%                        | 52                      | 70%                               |
| Boerma et al. (26)           | 2002 | retro        | 50              | WJ                              | 0%                          | 27                      | 88%                               |
| Nealon et al. (17)           | 2003 | retro        | 103             | WJ                              | 0%                          | 73                      | 87%                               |
| Falconi et al. (27)          | 2006 | prosp        | 40              | Frey                            | 0%                          | 60                      | 90%                               |
| Pessaux et al. (28)          | 2006 | retro        | 34              | Frey                            | 0%                          | 15                      | 88%                               |
| Terrace et al. (9)           | 2007 | retro        | 50              | WJ+Frey                         | 4%                          | 36                      | 71%                               |
| Cahen et al. (4)             | 2007 | RCT          | 20              | AWJ                             | 0%                          | 24                      | 75%                               |
| Sakata et al. (15)           | 2009 | retro        | 57              | Frey                            | 0%                          | 61                      | 77%                               |
| Roch et al. (29)             | 2012 | prosp        | 44              | Frey                            | 0%                          | 76                      | 68%                               |
| Van der Gaag et al. (30)     | 2012 | prosp        | 146             | AWJ                             | 0.7%                        | 63                      | 87%                               |
| Cooper et al. (31)           | 2013 | prosp        | 35              | Frey                            | 3%                          | 22                      | 79%                               |
| Pothula Rajendra et al. (14) | 2014 | prosp        | 25              | Frey                            | 0%                          | 12                      | 92%                               |

Retro = retrospective; prosp = prospective; RCT = randomized controlled trial; WJ = wirsungojejunostomy; Frey = Frey's procedure



**Table S5: Surgical procedures in Groove pancreatitis**

| <i>Author (ref)</i> | <i>Type of study</i>              | <i>Year</i> | <i>Surgery (No of cases)</i> | <i>Type of surgery</i>                                   | <i>Pain Resoluti on/ Relief</i> | <i>Body weight gain</i>            | <i>Pain recurrence</i> | <i>Grade of recommend ation</i> |
|---------------------|-----------------------------------|-------------|------------------------------|----------------------------------------------------------|---------------------------------|------------------------------------|------------------------|---------------------------------|
| Casetti (4)         | Observatio<br>nal cohort<br>study | 200<br>9    | 58                           | PD                                                       | 58/58<br>(100%)                 | Increased<br>post-op<br>median BMI | 11/58<br>(24%)         | 1C                              |
| Vullierme<br>(5)    | Retrospect<br>ive                 | 200<br>0    | 20                           | PD                                                       | nr                              | nr                                 | nr                     | 2C                              |
| Rebours<br>(6)      | Observatio<br>nal cohort<br>study | 200<br>7    | 29                           | PD<br>Double bypass                                      | 27/29<br>(93%)                  | nr                                 | 2/29<br>(7%)           | 1C                              |
| Jouannaud<br>(7)    | Observatio<br>nal cohort<br>study | 200<br>6    | 14                           | PD<br>Double bypass<br>Drainage<br>Gastroenterostom<br>y | 14/14<br>(100%)                 | nr                                 | nr                     | 1C                              |
| Egorov (8)          | Observatio<br>nal cohort<br>study | 201<br>4    | 52                           | PD<br>DPHR<br>PPDR<br>Drainage                           | 36/52<br>(69%)                  | 100%                               | nr                     | 1C                              |

nr: not reported; PD: pancreaticoduodenectomy; DPHR: duodenum-preserving pancreatic head resection; PPDR: pancreas-preserving duodenal resection; BMI: body mass index.

**Table S6: Studies in PERT with gastric acid suppression**

| Ref.                               | Intervention                                                                                                                                                                              | Study design                                                   | No. of patients (total)                         | Main outcome, follow-up time                                                                                                         | Main results                                                                                                                                                                                                                                                        | Grade    |
|------------------------------------|-------------------------------------------------------------------------------------------------------------------------------------------------------------------------------------------|----------------------------------------------------------------|-------------------------------------------------|--------------------------------------------------------------------------------------------------------------------------------------|---------------------------------------------------------------------------------------------------------------------------------------------------------------------------------------------------------------------------------------------------------------------|----------|
| Author (year)<br>Bruno 1994<br>(9) | Comparative effects of adjuvant cimetidine and omeprazole during PERT.                                                                                                                    | Double-blind, randomized, crossover                            | 10                                              | Fecal fat excretion, PERT+cimetidine vs. PERT+omeprazole                                                                             | Both therapies significantly lowered fat excretion compared to single PERT; omeprazole showed a trend towards a greater decrease, but not significant                                                                                                               | Moderate |
| Carroccio 1992<br>(10)             | Use of famotidine in severe EPI with persistent maldigestion on PERT, a long-term study in CF.                                                                                            | Prospective, double-blind, crossover                           | 10                                              | Famotidine vs. Placebo, 2x6-month periods                                                                                            | Significant reduction in fecal wet weight, improvement of CFA and steatocrit test.                                                                                                                                                                                  | Moderate |
| Dominguez-Munoz, 2006<br>(11)      | Optimizing the therapy of EPI by the association of a PPI with enteric-coated pancreatic extracts                                                                                         | Prospective monocenter cohort study, unblinded                 | 21                                              | 13C-MTG-BT at diagnosis, Creon (3x40000) after 3 months and + 40 mg esomeprazole after 2 extra weeks.                                | Significant increase in 13C-exhalation with Creon, no further increase with added PPI for total group, but no effect in patients who normalized fat digestion with Creon only (n=12); further improvement in others (n=9).                                          | Moderate |
| Durie, 1980<br>(12)                | Effect of cimetidine and sodium bicarbonate on PRT in CF.                                                                                                                                 | Monocenter, randomized crossover study                         | 15                                              | Pancrelipase vs. pancrelipase + sodium bicarbonate vs. pancrelipase + cimetidine vs. pancrelipase + sodium bicarbonate + cimetidine. | Significant reduction of fat and nitrogen excretion with additional drugs compared to pancrelipase alone and no significant differences between additional therapies; different intakes.                                                                            | Moderate |
| Lankisch, 1986<br>(13)             | Therapy of pancreatogenic steatorrhea: does acid protection of pancreatic enzymes offer any advantage?                                                                                    | Randomized controlled cross-over study                         | 8                                               | Pankreon vs. pankreon + cimetidine vs. creon                                                                                         | Significantly higher effect with pankreon+cimetidine and with creon than with conventional enzyme therapy alone.                                                                                                                                                    | Moderate |
| Regan, 1977<br>(14)                | Comparative effects of antacids, cimetidine and enteric coating on the therapeutic response to oral enzymes in severe pancreatic insufficiency                                            | Case-control study (with and without treatment)                | 6                                               | Steatorrhea; duodenal enzyme outputs (intubation technique)                                                                          | Steatorrhea abolished in 4 patients, reduced in all; significantly higher postprandial recoveries and concentrations of trypsin and lipase with pancreatin + cimetidine; EC-preparation and EC-preparation + antacids are not more effective than pancreatin alone. | Moderate |
| Sander-Struckmeier 2013<br>(15)    | Retrospective analysis to investigate the effect of concomitant use of gastric acid suppressing drugs on the efficacy and safety of pancrelipase/pancreatin (CREON) in patients with EPI. | Systematic review (retrospective analysis) of Abbott data base | 337 patients with acid suppression, 619 without | CFA                                                                                                                                  | CFA similar in patients with and without concomitant use of PPIs/H2RAs                                                                                                                                                                                              | Moderate |

**Table S7: Selected retrospective studies assessing long-term results of ESWL combined with endotherapy**

| First author, Year (Ref.) | No. | *Pain relief | Pain relapse | Surgery | Follow up (months) |
|---------------------------|-----|--------------|--------------|---------|--------------------|
| Delhayé, 2004 (16)        | 56  | 85%          | NR           | 22%     | 172                |
| Tadenuma, 2005 (17)       | 70  | 70%          | 37 %         | 1.4%    | 77                 |
| Clarke, 2012 (18)         | 55  | 51%          | NR           | 31%     | 58                 |
| Seven, 2012               | 120 | 85%          | 29%          | 12%     | 52                 |
| Tandan, 2013 (19)         | 272 | 96%          | 40 %         | 9%      | >60                |

NR, not reported

\*Partial or complete pain relief at the end of follow-up

**Table S8: Pancreatic stenting for strictures of the main pancreatic duct**

| <b><i>Selected retrospective studies (follow-up ≥24 months) assessing results of single plastic stenting for symptomatic dominant MPD stricture related to chronic pancreatitis</i></b> |                        |                                        |                                             |                           |
|-----------------------------------------------------------------------------------------------------------------------------------------------------------------------------------------|------------------------|----------------------------------------|---------------------------------------------|---------------------------|
| <b>Author, year (Ref)</b>                                                                                                                                                               | <b>No. of patients</b> | <b>Type of stent</b>                   | <b>Pain improvement after stent removal</b> | <b>Follow-up (months)</b> |
| Binmoeller, 1995 (20)                                                                                                                                                                   | 93                     | Single (5–7–10 Fr)                     | 65%                                         | 58                        |
| Smits, 1995 (21)                                                                                                                                                                        | 49                     | Single (10 Fr)                         | 82%                                         | 34                        |
| Vitale, 2004 (22)                                                                                                                                                                       | 89                     | Single (5–7–10 Fr)                     | 68%                                         | 43                        |
| Eleftheriadis, 2005 (23)                                                                                                                                                                | 100                    | Single (8.5–10 Fr)                     | 62%                                         | 69                        |
| Weber, 2007 (24)                                                                                                                                                                        | 17                     | Single (7–8.5–10–11.5 Fr)              | 83%                                         | 24                        |
| <b><i>Prospective study assessing results of multiple plastic stenting for symptomatic refractory dominant MPD stricture related to chronic pancreatitis</i></b>                        |                        |                                        |                                             |                           |
| Costamagna, 2006 (25)                                                                                                                                                                   | 19                     | Multiple (10–11,5 Fr)                  | 84%                                         | 38                        |
| <b><i>Prospective studies assessing results of FC-SEMS for symptomatic refractory dominant MPD stricture related to chronic pancreatitis</i></b>                                        |                        |                                        |                                             |                           |
| Park, 2008 (26)                                                                                                                                                                         | 13                     | FC-SEMS (Niti D-type)                  | NR                                          | 5                         |
| Sauer, 2008 (27)                                                                                                                                                                        | 6                      | FC-SEMS (Viabil)                       | 67%                                         | NR                        |
| Moon, 2010 (28)                                                                                                                                                                         | 32                     | FC-SEMS (Niti-S, bumpy type)           | 84%                                         | 5                         |
| Giacino, 2012 (29)                                                                                                                                                                      | 10                     | FC-SEMS (1 biliary WST, 9 biliary WFX) | 90%                                         | 19.8                      |

NR: Not reported

**Table S9: Mid-term results of endoscopic treatment in pediatric patients with CP**

| <b>Author, year<br/>(Ref)</b> | <b>No. of<br/>patients</b> | <b>Complete<br/>pain relief</b> | <b>Partial<br/>pain relief</b> | <b>Surgery</b> | <b>Follow-up<br/>(months)</b> |
|-------------------------------|----------------------------|---------------------------------|--------------------------------|----------------|-------------------------------|
| Agarwal, 2014<br>(30)         | 126                        | 63.6%                           | 21.6%                          | 2%             | 13                            |
| Li, 2010<br>(31)              | 42                         | 57%                             | 14%                            | 12%            | 61                            |
| Oracz, 2014<br>(32)           | 72                         | NR**                            | NR**                           | 14%            | 54                            |

NR, not reported

\*All patients had pancreatic stenting

\*\* The number of pancreatitis episodes per year decreased significantly decreased, from 1.75 to 0.23, after pancreatic stent placement

**Table S10: Studies on pain in chronic pancreatitis**

| Author (Ref)  | Year | Design                             | Timing groups                                                                              | No. of patients | Follow-up         | End-points                                                          | Quality assessment                                                                                                                                                        |
|---------------|------|------------------------------------|--------------------------------------------------------------------------------------------|-----------------|-------------------|---------------------------------------------------------------------|---------------------------------------------------------------------------------------------------------------------------------------------------------------------------|
| Ahmed Ali (1) | 2012 | Cross-sectional survey             | - ≤3 vs. 3 years<br>- Preoperative use of opioids<br>- <5 endoscopic interventions vs more | 266             | Median 62 months  | - Pain relief (VAS<4)<br>- Pancreatic function<br>- Quality of life | + Large N<br>+ Adequate follow-up duration<br>+ Patient's questionnaire<br>- Partly retrospective cohort<br>- Excluded patients with no follow-up                         |
| Yang2Yang (2) | 2015 | Retrospective cohort               | - ≤26.5 vs. > 26.5 months                                                                  | 66              | All 3 years       | - Pain free status<br>- Opioid use<br>- Pancreatic insufficiency    | - Small N<br>+ Adequate follow-up duration<br>- Only chart review (no questionnaires)<br>- Retrospective design<br>- Excluded patients with no follow-up                  |
| Riediger (3)  | 2007 | Cross-sectional survey             | - ≤3 vs. > 3 years                                                                         | 224             | Median 56 months  | - Pain (Y/N, >weekly)                                               | + Large N<br>+ Adequate follow-up duration<br>+ Patient's questionnaire<br>+ Prospective cohort<br>- Excluded patients with no follow-up<br>- Not focused on timing issue |
| Nealon (4)    | 1993 | RCT                                | - Surgical drainage vs. conservative                                                       | 37              | Median 124 months | - Pain relief (partial, complete)<br>- Pancreatic function          | - Unclear randomization technique<br>+ Follow-up complete<br>- No sample size (pilot study)<br>- No interventions in the control arm                                      |
| (5)           | 2014 | IPD MA (of Dite 2003 & Cahen 2007) | - Early vs. late surgery (not clearly defined)                                             | 406             | Unclear           | - Pain relief (partial or complete)                                 | + Meta-analysis of raw data<br>+ Large N<br>+ Prospective data<br>- Unclear cut-off point<br>- Unclear definition of end-point                                            |

**Outcomes:**

| Study                               | No.                        | Factor                                | Summary statistic                      | Results                                 |
|-------------------------------------|----------------------------|---------------------------------------|----------------------------------------|-----------------------------------------|
| <b>Pain relief</b>                  |                            |                                       |                                        |                                         |
| Ahmed Ali 2012 (1)                  | 259                        | ≤3 vs. >3 years                       | OR (multivariate)                      | <b>1.81 (1.02-3.37), P=0.03</b>         |
|                                     | No preoperative opioid use | OR (multivariate)                     | <b>2.14 (1.23-3.96), P=0.006</b>       |                                         |
|                                     | Endoscopic treatment (<5)  | OR (multivariate)                     | <b>2.46 (1.10-6.27), P=0.04</b>        |                                         |
| Yang 2015 (2)                       | 66                         | ≤26.5 vs. >26.5 months                | % Pain free                            | <b>58% vs. 23%, P&lt;0.001</b>          |
|                                     | ≤26.5 vs. >26.5 months     | % Postoperative opioid use            | <b>36% vs. 57%, P=0.05</b>             |                                         |
| Riediger 2007 (3)                   | 224                        | ≤3 vs. >3 years                       | % Pain (any frequency)                 | 37% vs. 43%, P=0.41                     |
|                                     | ≤3 vs. >3 years            | % Weekly or daily pain                | 13% vs. 15%, P=0.66                    |                                         |
| Nealon 1993 (4)                     | 37                         | Surgery vs. no surgery (conservative) | % Pain relief (any)                    | <b>16 (94%) vs. 2 (13%), P&lt;0.001</b> |
|                                     |                            | % Complete pain relief                | <b>14 (82%) vs. 0 (0%), P&lt;0.001</b> |                                         |
|                                     |                            | % Partial pain relief                 | 2 (12%) vs. 2 (13%), NS                |                                         |
| Yang 2014 (5)                       | 406                        | Early vs. late surgery                | RR (IPD MA)                            | <b>1.67 (1.09–2.56), P=0.02</b>         |
| <b>Exocrine pancreatic function</b> |                            |                                       |                                        |                                         |
| Yang 2015 (2)                       | 66                         | ≤26.5 vs. >26.5 months                | % exocrine pancreatic function         | 42% vs. 60%, P=0.22                     |
| Riediger 2007                       | 224                        | ≤3 vs. >3 years                       | % exocrine                             | <b>54% vs. 75%, P=0.001</b>             |

|                      |     |                                             |                                          |                                        |
|----------------------|-----|---------------------------------------------|------------------------------------------|----------------------------------------|
| (3)                  |     |                                             | pancreatic<br>function                   |                                        |
| Riediger 2007<br>(3) | 224 | ≤3 vs. >3 years                             | OR<br>(multivariate)                     | <b>2.47 (1.38-4.41), P=0.002</b>       |
| Nealon 1993<br>(4)   | 29  | Surgery vs. no<br>surgery<br>(conservative) | % new onset<br>exocrine<br>insufficiency | <b>1 (7%) vs. 11 (79%), P&lt;0.001</b> |

### Endocrine pancreatic function

|                       |     |                                             |                                           |                                      |
|-----------------------|-----|---------------------------------------------|-------------------------------------------|--------------------------------------|
| Ahmed Ali 2012<br>(1) | 258 | ≤3 vs. >3 years                             | OR                                        | <b>0.57 (0.33-0.96), P=.04</b>       |
| Yang 2015 (2)         | 66  | ≤26.5 vs. >26.5<br>months                   | % endocrine<br>pancreatic<br>function     | 48% vs. 49%, P=0.99                  |
| Riediger 2007<br>(3)  | 224 | ≤3 vs. >3 years                             | % endocrine<br>pancreatic<br>function     | 49% vs. 58%, P=0.15                  |
| Nealon 1993<br>(4)    | 25  | Surgery vs. no<br>surgery<br>(conservative) | % new onset<br>endocrine<br>insufficiency | <b>2 (15%) vs. 10 (83%), P=0.001</b> |

### Quality of life

|                       |  |                            |                                               |                                                       |
|-----------------------|--|----------------------------|-----------------------------------------------|-------------------------------------------------------|
| Ahmed Ali 2012<br>(1) |  | Preoperative opioid<br>use | WMD, SF-<br>36, physical<br>composed<br>score | <b>-4.81 (-7.36 to -2.28),<br/>P&lt;0.001</b>         |
|                       |  | Preoperative opioid<br>use | WMD, SF-<br>36, mental<br>composed<br>score   | <b>-5.34<br/>(-8.01 to<br/>-2.70),<br/>P&lt;0.001</b> |



## References for the Supplement

1. Schunemann HJ, Oxman AD, Brozek J, Glasziou P, Jaeschke R, Vist GE, et al. Grading quality of evidence and strength of recommendations for diagnostic tests and strategies. *BMJ*. 2008;336(7653):1106-10.
2. Issa Y, Kempeneers MA, van Santvoort HC, Bollen TL, Bipat S, Boermeester MA. Diagnostic performance of imaging modalities in chronic pancreatitis: a systematic review and meta-analysis. *Pancreatology*. 2016;16:in press.
3. Delcore R, Rodriguez FJ, Thomas JH, Forster J, Hermreck AS. The role of pancreatojejunostomy in patients without dilated pancreatic ducts. *Am J Surg*. 1994;168(6):598-601; discussion -2.
4. Casetti L, Bassi C, Salvia R, Butturini G, Graziani R, Falconi M, et al. "Paraduodenal" pancreatitis: results of surgery on 58 consecutive patients from a single institution. *World J Surg*. 2009;33(12):2664-9.
5. Vullierme MP, Vilgrain V, Flejou JF, Zins M, O'Toole D, Ruzsiewicz P, et al. Cystic dystrophy of the duodenal wall in the heterotopic pancreas: radiopathological correlations. *J Comput Assist Tomogr*. 2000;24(4):635-43.
6. Rebours V, Levy P, Vullierme MP, Couvelard A, O'Toole D, Aubert A, et al. Clinical and morphological features of duodenal cystic dystrophy in heterotopic pancreas. *Am J Gastroenterol*. 2007;102(4):871-9.
7. Jouannaud V, Coutarel P, Tossou H, Butel J, Vitte RL, Skinazi F, et al. Cystic dystrophy of the duodenal wall associated with chronic alcoholic pancreatitis. Clinical features, diagnostic procedures and therapeutic management in a retrospective multicenter series of 23 patients. *Gastroenterol Clin Biol*. 2006;30(4):580-6.
8. Egorov VI, Vankovich AN, Petrov RV, Starostina NS, Butkevich A, Sazhin AV, et al. Pancreas-preserving approach to "paraduodenal pancreatitis" treatment: why, when, and how? Experience of treatment of 62 patients with duodenal dystrophy. *Biomed Res Int*. 2014;2014:185265.
9. Bruno MJ, Rauws EA, Hoek FJ, Tytgat GN. Comparative effects of adjuvant cimetidine and omeprazole during pancreatic enzyme replacement therapy. *Dig Dis Sci*. 1994;39:988-92.
10. Carroccio A, Pardo F, Montalto G, Iapichino L, Soresi M, Aversa MR, et al. Use of famotidine in severe exocrine pancreatic insufficiency with persistent maldigestion on enzymatic replacement therapy. A long-term study in cystic fibrosis. *Dig Dis Sci*. 1992;37(9):1441-6.
11. Dominguez-Munoz JE, Iglesias-Garcia J, Iglesias-Rey M, Vilarino-Insua M. Optimising the therapy of exocrine pancreatic insufficiency by the association of a proton pump inhibitor to enteric coated pancreatic extracts. *Gut*. 2006;55(7):1056-7.
12. Durie PR, Bell L, Linton W, Corey ML, Forstner GG. Effect of cimetidine and sodium bicarbonate on pancreatic replacement therapy in cystic fibrosis. *Gut*. 1980;21(9):778-86.
13. Lankisch PG, Lembcke B, Goke B, Creutzfeldt W. Therapy of pancreatogenic steatorrhea: does acid protection of pancreatic enzymes offer any advantage? *Z Gastroenterol*. 1986;24(12):753-7.
14. Regan PT, Malagelada JR, DiMaggio EP, Glanzman SL, Go VL. Comparative effects of antacids, cimetidine and enteric coating on the therapeutic response to oral enzymes in severe pancreatic insufficiency. *N Engl J Med*. 1977;297(16):854-8.
15. Sander-Struckmeier S, Beckmann K, Janssen-van Solingen G, Pollack P. Retrospective analysis to investigate the effect of concomitant use of gastric acid-suppressing drugs on the efficacy and safety of pancrelipase/pancreatin (CREON(R)) in patients with pancreatic exocrine insufficiency. *Pancreas*. 2013;42(6):983-9.
16. Delhaye M, Arvanitakis M, Verset G, Cremer M, Devière J. Long-term clinical

- outcome after endoscopic pancreatic ductal drainage for patients with painful chronic pancreatitis. *Clin Gastroenterol Hepatol*. 2004;2(12):1096-106.
17. Tadenuma H, Ishihara T, Yamaguchi T, Tsuchiya S, Kobayashi A, Nakamura K, et al. Long-term results of extracorporeal shockwave lithotripsy and endoscopic therapy for pancreatic stones. *Clin Gastroenterol Hepatol*. 2005;3(11):1128-35.
  18. Clarke B, Slivka A, Tomizawa Y, Sanders M, Papachristou GI, Whitcomb DC, et al. Endoscopic therapy is effective for patients with chronic pancreatitis. *Clin Gastroenterol Hepatol*. 2012;10(7):795-802.
  19. Tandan M, Reddy DN, Talukdar R, Vinod K, Santosh D, Lakhtakia S, et al. Long-term clinical outcomes of extracorporeal shockwave lithotripsy in painful chronic calcific pancreatitis. *Gastrointestinal Endoscopy*. 2013;78(5):726-33.
  20. Binmoeller KF, Jue P, Seifert H, Nam WC, Izbicki JR, Soehendra N. Endoscopic pancreatic stent drainage in chronic pancreatitis and a dominant stricture: long-term results. *Endoscopy*. 1995;27:638-44.
  21. Smits ME, Badiga SM, Rauws EA, Tytgat GN, Huibregtse K. Long-term results of pancreatic stents in chronic pancreatitis. *Gastrointestinal endoscopy*. 1995;42(5):461-7.
  22. Vitale GC, Cothron K, Vitale EA, Rangnekar N, Zavaleta CM, Larson GM, et al. Role of pancreatic duct stenting in the treatment of chronic pancreatitis. *Surgical endoscopy*. 2004;18(10):1431-4.
  23. Eleftherladis N, Dinu F, Delhaye M, Le Moine O, Baize M, Vandermeeren A, et al. Long-term outcome after pancreatic stenting in severe chronic pancreatitis. *Endoscopy*. 2005;37(3):223-30.
  24. Weber A, Schneider J, Neu B, Meining A, Born P, Schmid RM, et al. Endoscopic stent therapy for patients with chronic pancreatitis: results from a prospective follow-up study. *Pancreas*. 2007;34(3):287-94.
  25. Costamagna G, Bulajic M, Tringali A, Pandolfi M, Gabbrielli A, Spada C, et al. Multiple stenting of refractory pancreatic duct strictures in severe chronic pancreatitis: long-term results. *Endoscopy*. 2006;38(3):254-9.
  26. Park DH, Kim MH, Moon SH, Lee SS, Seo DW, Lee SK. Feasibility and safety of placement of a newly designed, fully covered self-expandable metal stent for refractory benign pancreatic ductal strictures: a pilot study (with video). *Gastrointest Endosc*. 2008;68(6):1182-9.
  27. Sauer B, Talreja J, Ellen K, Ku J, Shami VM, Kahaleh M. Temporary placement of a fully covered self-expandable metal stent in the pancreatic duct for management of symptomatic refractory chronic pancreatitis: preliminary data (with videos). *Gastrointestinal endoscopy*. 2008;68(6):1173-8.
  28. Moon SH, Kim MH, Park DH, Song TJ, Eum J, Lee SS, et al. Modified fully covered self-expandable metal stents with antimigration features for benign pancreatic-duct strictures in advanced chronic pancreatitis, with a focus on the safety profile and reducing migration. *Gastrointestinal Endoscopy*. 2010;72(1):86-91.
  29. Giacino C, Grandval P, Laugier R. Fully covered self-expanding metal stents for refractory pancreatic duct strictures in chronic pancreatitis. *Endoscopy*. 2012;44(9):874-7.
  30. Agarwal J, Nageshwar Reddy D, Talukdar R, Lakhtakia S, Ramchandani M, Tandan M, et al. ERCP in the management of pancreatic diseases in children. *Gastrointestinal Endoscopy*. 2014;79(2):271-8.
  31. Li Z-S, Wang W, Liao Z, Zou D-W, Jin Z-D, Chen J, et al. A long-term follow-up study on endoscopic management of children and adolescents with chronic pancreatitis. *The American journal of gastroenterology*. 2010;105(8):1884-92.
  32. Oracz G, Pertkiewicz J, Kierkus J, Dadalski M, Socha J, Ryzko J. Efficiency of pancreatic duct stenting therapy in children with chronic pancreatitis. *Gastrointestinal Endoscopy*. 2014;80(6):1022-9.

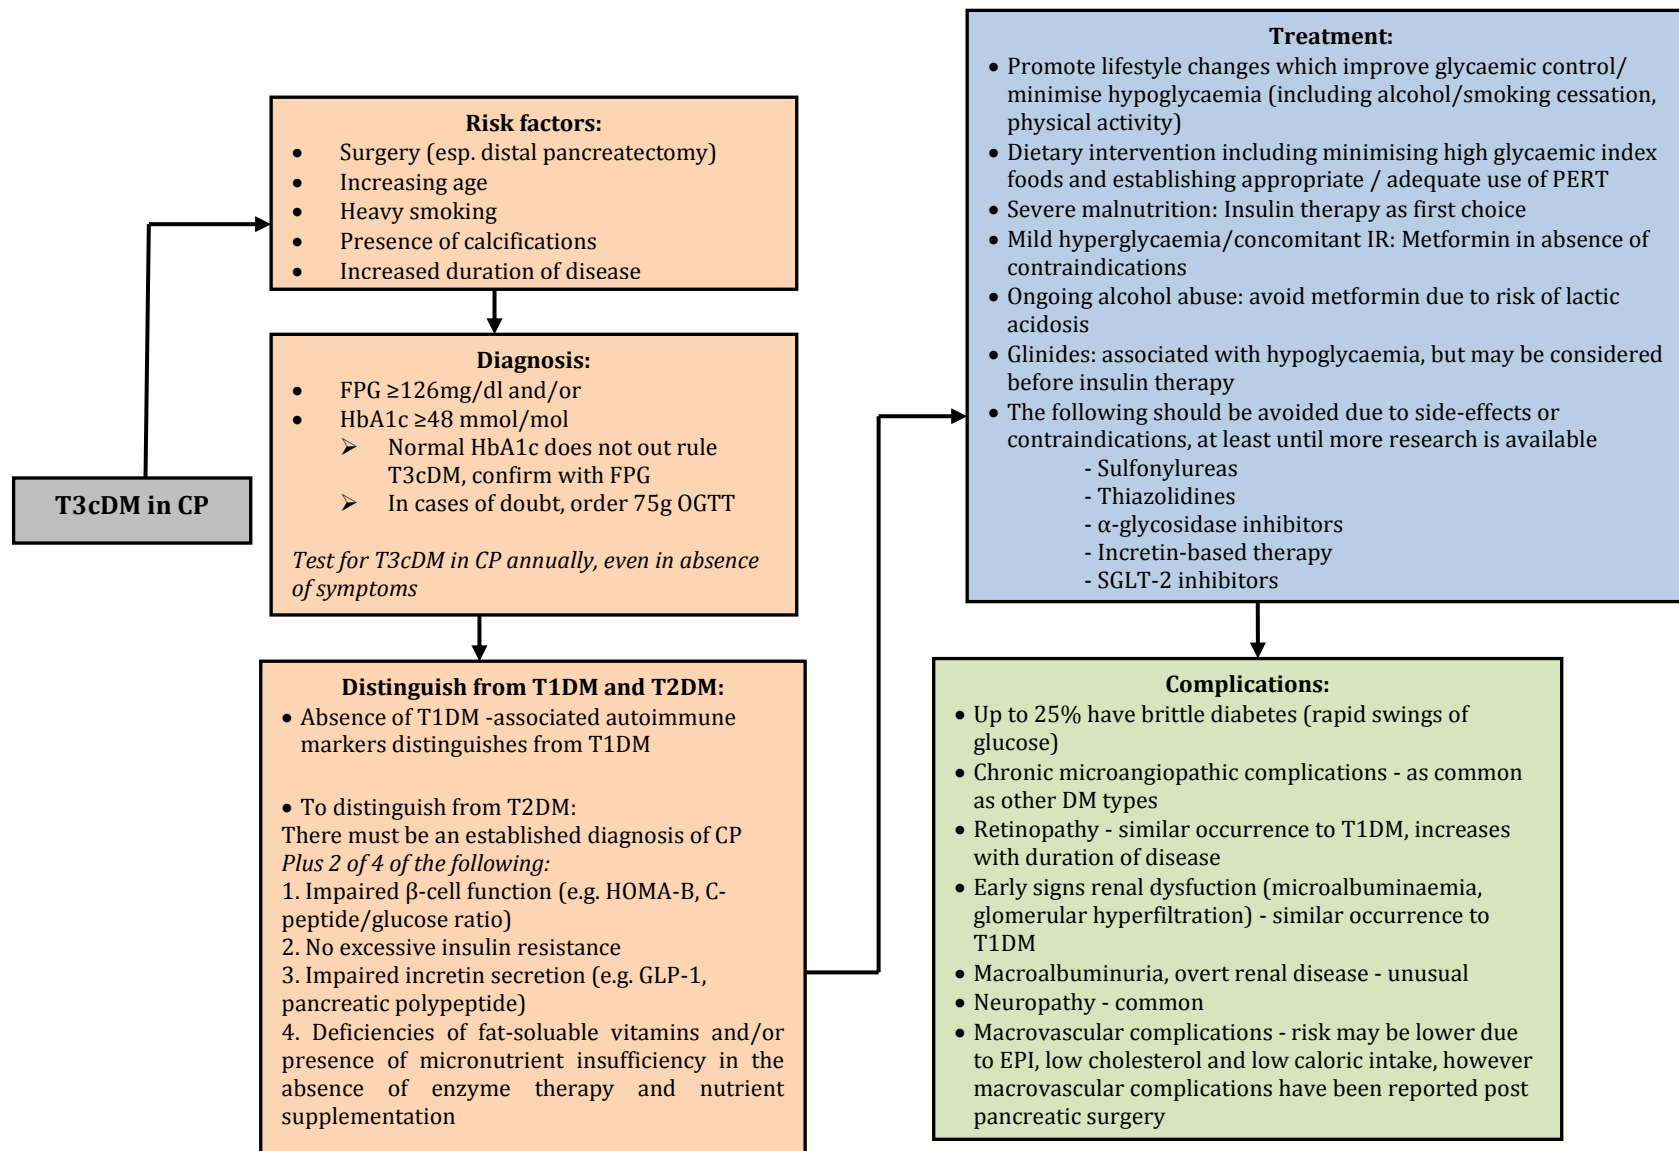

# Appendix

## Ad 4.1 Surgery

In-depth comparison of studies comparing surgery and endoscopic therapy in chronic pancreatitis

### Characteristics of included studies

#### Cahen 2007

|                            |                                                                                                                                                                                                                                                                                                                                                                                                                                                                                                                                                                                                                                                                                                                                                                                                                                                                                                                                                                                                                                                                                                                |
|----------------------------|----------------------------------------------------------------------------------------------------------------------------------------------------------------------------------------------------------------------------------------------------------------------------------------------------------------------------------------------------------------------------------------------------------------------------------------------------------------------------------------------------------------------------------------------------------------------------------------------------------------------------------------------------------------------------------------------------------------------------------------------------------------------------------------------------------------------------------------------------------------------------------------------------------------------------------------------------------------------------------------------------------------------------------------------------------------------------------------------------------------|
| <p><b>Methods</b></p>      | <p><i>Study design:</i> RCT</p> <p><i>Setting of study:</i> single center, AMC Amsterdam, the Netherlands.</p> <p><i>Follow-up period:</i> 24 months, <u>with a second long-term publication after minimal follow-up of 5 years.</u></p> <p><i>Loss to follow-up (2 years follow-up):</i> 1 patient in the surgical group.</p> <p><u><i>Loss to follow-up (5 years follow-up): 3 patient in the endoscopy group, and 5 patients in the surgery group.</i></u></p> <p><i>Type of analysis:</i> intention-to-treat analysis.</p> <p><i>Sample size calculations:</i> yes, a sample size of 50 patients was calculated.</p>                                                                                                                                                                                                                                                                                                                                                                                                                                                                                       |
| <p><b>Participants</b></p> | <p><i>Number of participants:</i> 39 (19 in the endoscopy group, 20 in the surgical group).</p> <p><i>Gender:</i> endoscopy group: 11 males, 8 females; surgery group: 15 males, 5 females.</p> <p><i>Age [mean (SD)]:</i> endoscopy group: 52 years (9); surgery group: 46 years (12).</p> <p><i>BMI [mean (SD)]:</i> endoscopy group: 21 kg (4.1); surgery group: 21 kg (3.7)</p> <p><i>Type of pain:</i></p> <p><i>endoscopy group:</i> 7 patients with intermittent pain (type A), 12 patients with continuous pain (type B).</p> <p><i>surgery group:</i> 9 patients with intermittent pain (type A), 11 patients with continuous pain (type B).</p> <p><i>Inclusion criteria:</i></p> <p>Established CP</p> <p>Obstruction of pancreatic duct (&gt;5 mm)</p> <p>No pancreatic head enlargement</p> <p>Severe recurrent pancreatic pain intractable to non-narcotic analgesics</p> <p><i>Exclusion criteria:</i></p> <p>Age &lt;18 or &gt;80 years</p> <p>Enlargement of pancreatic head &gt;4 cm</p> <p>Contra-indications to surgery or endoscopic interventions</p> <p>Previous pancreatic surgery</p> |

|                      |                                                                                                                                                                                                                                                                                                                                                                                                                                                                                                                                                                                                                                                                                                                                                                                                                                                                                        |
|----------------------|----------------------------------------------------------------------------------------------------------------------------------------------------------------------------------------------------------------------------------------------------------------------------------------------------------------------------------------------------------------------------------------------------------------------------------------------------------------------------------------------------------------------------------------------------------------------------------------------------------------------------------------------------------------------------------------------------------------------------------------------------------------------------------------------------------------------------------------------------------------------------------------|
|                      | <p>Suspected pancreatic malignancy, or life expectancy &lt;2 years</p> <p>Pregnancy</p> <p>Duration of symptoms: endoscopy group: 16 months (SD 14); surgery group 21 months (SD 19)</p> <p>Ongoing alcohol abuse at randomization: endoscopy group: 0 patients; surgical group: 5 patients.</p> <p>Ongoing smoking at randomization: endoscopy group: 15 patients; surgical group: 17 patients.</p>                                                                                                                                                                                                                                                                                                                                                                                                                                                                                   |
| <b>Interventions</b> | <p>Endoscopic drainage versus surgical drainage:</p> <p><i>Endoscopic drainage:</i> endoscopic drainage of the pancreatic duct by ERCP with (repeated) dilatation and stent placement if required. Patients with large stones in the pancreatic duct (&gt;7 mm) underwent ESWL before drainage.</p> <p><i>Surgical drainage:</i> surgical drainage of the pancreatic duct by means of a longitudinal pancreaticojejunostomy as intended treatment. In 1 patient, a Whipple procedure was performed because of peripancreatic inflammation. In another patient, stone extraction required a Frey procedure.</p> <p><i>Endoscopic experience:</i> study interventions were performed by experienced endoscopists (performed &gt;1000 ERCPs).</p> <p><i>Surgical experience:</i> surgical procedures were performed by experienced pancreatic surgeons (no specific criteria stated).</p> |
| <b>Outcomes</b>      | <p><i>Primary outcome (prespecified in method section):</i></p> <p>Pain score (Izbicki questionnaire)</p> <p><i>Secondary outcomes (prespecified in method section):</i></p> <p>Pain relief (defined by Izbicki score)</p> <p>Physical and mental health (SF-36 questionnaires)</p> <p>Post-interventional complications</p> <p>Length of hospital stay</p> <p>Number of performed procedures</p> <p>Change in pancreatic function</p> <p>Mortality</p> <p><i>Other outcomes (results reported, but not specified in method section):</i></p> <p>Conversion to surgery</p> <p>Technical success of intervention</p> <p>Hospital re-admittance</p> <p>Time points of outcomes: 6 weeks and 3, 6, 12, 18 and 24 months.</p> <p><u>Long-term follow-up: minimum of 5 years (mean follow-up was 85 months in the endoscopy and 92 months in the surgery group).</u></p>                    |
| <b>Notes</b>         | <p>Study was terminated prematurely by the safety committee on the basis of a significant difference in outcome favoring the surgical group with <math>P &lt; 0.001</math> regarding the primary outcome (pain on the Izbicki pain score).</p> <p>Author provided us with additional methodological information and data.</p>                                                                                                                                                                                                                                                                                                                                                                                                                                                                                                                                                          |

| Bias                                           | Authors' judgement | Support for judgement                                                                                                           |
|------------------------------------------------|--------------------|---------------------------------------------------------------------------------------------------------------------------------|
| Random sequence generation (selection bias)    | Low risk           | Automated assignment system.                                                                                                    |
| Allocation concealment (selection bias)        | Low risk           | Specifically stated.                                                                                                            |
| Blinding (performance bias and detection bias) | High risk          |                                                                                                                                 |
| Incomplete outcome data (attrition bias)       | Low risk           | Proportion of loss to follow-up did not exceed 20%.                                                                             |
| Selective reporting (reporting bias)           | Low risk           | All relevant and pre-specified outcomes reported.                                                                               |
| Other bias                                     | Low risk           | Study terminated prematurely, but authors performed adequate adjustment for treatment effect and P value for early termination. |

## Dite 2003

|                     |                                                                                                                                                                                                                                                                                                                                                                                                                                                                                                                                                                                                                                                                                                                                                                                                                                                                                                                                                                                                                                                                                                                                                                   |
|---------------------|-------------------------------------------------------------------------------------------------------------------------------------------------------------------------------------------------------------------------------------------------------------------------------------------------------------------------------------------------------------------------------------------------------------------------------------------------------------------------------------------------------------------------------------------------------------------------------------------------------------------------------------------------------------------------------------------------------------------------------------------------------------------------------------------------------------------------------------------------------------------------------------------------------------------------------------------------------------------------------------------------------------------------------------------------------------------------------------------------------------------------------------------------------------------|
| <b>Methods</b>      | <p><i>Study design:</i> pseudo-RCT (alternating allocation)</p> <p><i>Setting of study:</i> single center, University Hospital Brno, Czech Republic</p> <p><i>Follow-up period:</i> 5 years</p> <p><i>Loss to follow-up:</i> patients not compliant to follow-up were excluded</p> <p><i>Type of analysis:</i> per protocol analysis</p> <p><i>Sample size calculation:</i> yes, a sample size of 140 patients was calculated.</p>                                                                                                                                                                                                                                                                                                                                                                                                                                                                                                                                                                                                                                                                                                                                |
| <b>Participants</b> | <p><i>Number of randomized participants:</i> 72 (36 in the endoscopy group, 36 in the surgical group). The population of the RCT is part of a larger prospective cohort reported in the same publication. The total sample of the cohort is 140.</p> <p><i>Gender:</i> not specified for the randomized group (only for the complete cohort, with 119 males and 21 females).</p> <p><i>Age:</i> not specified for the randomized group (only for the complete cohort with a mean age of 41.7 years ranging between 26–53).</p> <p><i>BMI:</i> not specified</p> <p><i>Type of pain (continuous vs recurrent flair ups):</i> not specified.</p> <p><i>Inclusion criteria:</i></p> <ul style="list-style-type: none"> <li>Established CP</li> <li>Obstruction of pancreatic duct (dilated pancreatic duct)</li> <li>Painful CP (pain score &gt;3 on the Melzack's pain score).</li> <li>Failure of conservative management in the previous 3 years.</li> <li>Duration of clinical CP &gt;5 years</li> <li>Consensus of surgeon and gastroenterologist regarding suitability of patient for both endoscopy and surgery.</li> </ul> <p><i>Exclusion criteria:</i></p> |

|                      |                                                                                                                                                                                                                                                                                                                                                                                                                                                                                                                                                                                                                                                                                                                                                                                                                                                                                                                                                                                                                                                                                                                                                                                               |
|----------------------|-----------------------------------------------------------------------------------------------------------------------------------------------------------------------------------------------------------------------------------------------------------------------------------------------------------------------------------------------------------------------------------------------------------------------------------------------------------------------------------------------------------------------------------------------------------------------------------------------------------------------------------------------------------------------------------------------------------------------------------------------------------------------------------------------------------------------------------------------------------------------------------------------------------------------------------------------------------------------------------------------------------------------------------------------------------------------------------------------------------------------------------------------------------------------------------------------|
|                      | <p>Age &lt;18 or &gt;70 years</p> <p>Previous interventional therapy for CP (surgery, endoscopy or nerve block).</p> <p>Suspected pancreatic malignancy.</p> <p>Non-compliance to follow-up examinations.</p> <p>Pregnancy.</p> <p>Duration of symptoms: &gt;5 years (inclusion criteria).</p> <p>Ongoing alcohol abuse and/or smoking at randomization: not reported.</p>                                                                                                                                                                                                                                                                                                                                                                                                                                                                                                                                                                                                                                                                                                                                                                                                                    |
| <b>Interventions</b> | <p><i>Endoscopic drainage versus surgical intervention (drainage and resection):</i></p> <p><i>Endoscopic drainage:</i> endoscopic drainage of the pancreatic duct by ERCP with pancreatic sphincterotomy, stone extraction, dilation of strictures and stenting, as appropriate. ESWL was not applied as part of the endoscopic intervention.</p> <p><i>Surgical intervention:</i> choice of operation was dependent on the morphology of the pancreas on pre-operative imaging. Pancreaticojejunostomy was performed in patients with absence of focal pancreatic enlargement. In patients in whom disease was limited predominantly to the pancreatic head, either duodenum-preserving pancreatic head resection or pancreatoduodenectomy (Whipple resection) were performed. CP predominantly affecting the pancreatic tail was treated by left pancreatic resection.</p> <p><i>Endoscopic experience:</i> study interventions were performed by 2 experienced endoscopists (performed &gt;200 drainage procedures).</p> <p><i>Surgical experience:</i> surgical procedures were performed by 1 abdominal surgeon (performed 90 pancreatic operations before the start of the study).</p> |
| <b>Outcomes</b>      | <p><i>Primary outcome (prespecified in method section):</i></p> <p>Pain relief (defined by Melzack score)</p> <p>Necessity for further interventions</p> <p><i>Secondary outcomes (prespecified in method section):</i></p> <p>Change in body weight</p> <p>Presence of diabetes</p> <p><i>Other outcomes (results reported, but not specified in method section):</i></p> <p>Complications</p> <p>Mortality</p> <p>Time points of outcomes: 6 months and 1, 3 and 5 years.</p>                                                                                                                                                                                                                                                                                                                                                                                                                                                                                                                                                                                                                                                                                                               |
| <b>Notes</b>         | <p>The population of the RCT is part of a larger prospective cohort reported in the same publication.</p> <p>Author provided us with additional information regarding methodology of the study, but not with additional data regarding missing baseline characteristics and outcomes.</p>                                                                                                                                                                                                                                                                                                                                                                                                                                                                                                                                                                                                                                                                                                                                                                                                                                                                                                     |

**Risk of bias table****Bias****Authors'****Support for judgement**

| <b>judgement</b>                               |              |                                                                                                                                                                                                                                                                                                                                                                                                              |
|------------------------------------------------|--------------|--------------------------------------------------------------------------------------------------------------------------------------------------------------------------------------------------------------------------------------------------------------------------------------------------------------------------------------------------------------------------------------------------------------|
| Random sequence generation (selection bias)    | High risk    | Allocation by alternation.                                                                                                                                                                                                                                                                                                                                                                                   |
| Allocation concealment (selection bias)        | High risk    |                                                                                                                                                                                                                                                                                                                                                                                                              |
| Blinding (performance bias and detection bias) | High risk    |                                                                                                                                                                                                                                                                                                                                                                                                              |
| Incomplete outcome data (attrition bias)       | High risk    | Patients not compliant to follow-up were excluded.                                                                                                                                                                                                                                                                                                                                                           |
| Selective reporting (reporting bias)           | Low risk     | All pre-specified outcomes reported.                                                                                                                                                                                                                                                                                                                                                                         |
| Other bias                                     | Unclear risk | <p>The study did not present a baseline table with relevant patient characteristics and potential confounders (e.g. smoking, alcohol use, pre-operative pain, etc).</p> <p>Study allowed for inclusion of patients with enlarged pancreatic head. These patients potentially benefit more from surgery than endoscopy, since surgery allows for resection of the inflamed mass while endoscopy does not.</p> |

**Nealon 1993**

|                     |                                                                                                                                                                                                                                                                                                                                                                                                                                                             |
|---------------------|-------------------------------------------------------------------------------------------------------------------------------------------------------------------------------------------------------------------------------------------------------------------------------------------------------------------------------------------------------------------------------------------------------------------------------------------------------------|
| <b>Methods</b>      | <p><i>Study design:</i> RCT</p> <p><i>Setting of study:</i> single center, The University of Texas Medical Branch, Galveston, Texas.</p> <p><i>Follow-up period:</i> median 124 months</p> <p><i>Loss to follow-up:</i> no</p> <p><i>Type of analysis:</i> intention-to-treat analysis.</p> <p><i>Sample size calculations:</i> no (pilot study)</p>                                                                                                        |
| <b>Participants</b> | <p><i>Number of participants:</i> 32 patients (17 in the surgical group, 15 in the conservative group)</p> <p><i>Gender:</i> not specified</p> <p><i>Age [mean]:</i> 41.7 years in the surgical group, 44.6 in the conservative group</p> <p><i>Inclusion criteria:</i></p> <p>Established CP</p> <p>Dilation of pancreatic duct</p> <p>Mild, non-debilitating pain</p> <p>Mild to moderate grade of CP: using a self developed grading system (1 point</p> |



|                      |                                                                                                                                                                                                                                                                                                                                                                                                                                                                                                 |
|----------------------|-------------------------------------------------------------------------------------------------------------------------------------------------------------------------------------------------------------------------------------------------------------------------------------------------------------------------------------------------------------------------------------------------------------------------------------------------------------------------------------------------|
|                      | <p>for morphology on ERCP, 2 points for exocrine function, 2 points for endocrine function). Patients were categorized as mild/moderate (3 points or less) or severe CP (&gt;3 points).</p> <p><i>Exclusion criteria:</i> not specified</p> <p><i>Duration of symptoms:</i> not specified</p> <p><i>Ongoing alcohol abuse at randomization:</i> not specified for patients within the RCT.</p> <p><i>Ongoing smoking at randomization:</i> not specified</p>                                    |
| <b>Interventions</b> | <p><i>Surgical drainage versus conservative treatment</i></p> <p><i>Surgical drainage:</i> surgical drainage of the pancreatic duct by means of a longitudinal pancreaticojejunostomy, with choledochenterostomy and pseudocyst drainage when deemed necessary. In patients with duodenal obstruction, a gastrojejunostomy was performed as well.</p> <p><i>Conservative treatment:</i> not specified.</p> <p><i>Surgical experience:</i> not specified</p>                                     |
| <b>Outcomes</b>      | <p><i>Primary and secondary outcomes (prespecified in method section): not specified as such.</i></p> <p><i>Outcomes (specified in method section):</i></p> <p>Presence of abdominal pain</p> <p>Grade of CP (using the self-developed grading system described above).</p> <p><i>Other outcomes (results reported, but not specified in method section):</i></p> <p>Exocrine and endocrine pancreatic function</p> <p>Time points of outcomes: standardized follow-up each 14 to 16 months</p> |
| <b>Notes</b>         | <p>The population of the RCT is part of a larger prospective cohort reported in the same publication.</p> <p>The author only published the results of the first 17 patients. Other data were provided by the author for the purpose of this review.</p>                                                                                                                                                                                                                                         |

### Risk of bias table

| <b>Bias</b>                                    | <b>Authors' judgement</b> | <b>Support for judgement</b>                                                                                                                 |
|------------------------------------------------|---------------------------|----------------------------------------------------------------------------------------------------------------------------------------------|
| Random sequence generation (selection bias)    | Unclear risk              | Last digit of the MRI number was used (odd versus even digits). It is unclear if the numbers generated by such a mechanism are truly random. |
| Allocation concealment (selection bias)        | High risk                 |                                                                                                                                              |
| Blinding (performance bias and detection bias) | High risk                 |                                                                                                                                              |
| Incomplete outcome data (attrition bias)       | Low risk                  | Proportion of losses to follow-up did not exceed 20%.                                                                                        |

|                                         |              |                                                                                                             |
|-----------------------------------------|--------------|-------------------------------------------------------------------------------------------------------------|
| Selective reporting<br>(reporting bias) | Low risk     | All specified data were reported.                                                                           |
| Other bias                              | Unclear risk | The study did not present a baseline table with relevant patient characteristics and potential confounders. |
