# Supplementary material
Source: PubMed Central journal article supplement (PMC5349368)
Supplement: UEG684695_supplementary_material2.pdf [file UEG684695_supplementary_material2.pdf]

**Comments.** In the setting of clinical studies, the QLQ-C30 and SF-36 are the most widely used questionnaires studying QOL in patients with CP. No studies have been performed to compare the validity and reliability of both tests in patients with CP in order to determine whether one test is superior to the other.

Even in a busy outpatient clinic, CP patients can use the waiting time before consultation to fill out the SF-12 questionnaire. The less time-consuming questionnaire may even increase the motivation and participation of patients in clinical studies to complete QoL questionnaires. The SF-12 showed excellent correlation with the longer SF-36 questionnaire ( $r = 0.960$ ,  $p < 0.001$ ).<sup>515</sup> In one study, SF-12 was compared to QLQ-C30 in 163 patients with CP and the SF-12 was found to be more reliable and easier to use in routine clinical practice.<sup>686</sup>

## Conclusions

The HaPanEU/UEG guidelines on the management of CP are the result of an international, multidisciplinary, evidence-based approach. These guidelines provide recommendations for key aspects of the medical and surgical management of CP combined with comments based on the available literature and the opinions of leading pancreatologists from Europe.

The focus should now shift towards the optimal dissemination and implementation of these guidelines, which is not a given likelihood.<sup>687</sup> Several studies have indicated that guideline implementation is frequently suboptimal, at least in acute pancreatitis,<sup>688,689</sup> and hence a structured, ongoing effort is required, especially since guidelines in gastroenterology tend to fall short of other disciplines.<sup>690</sup> To overcome these shortcomings, guideline dissemination will be facilitated by free online access. There will also be a Smartphone application (HaPanEU) available to allow easy access and facilitate guideline use in daily practice as such apps are becoming increasingly popular.<sup>691–693</sup>

Although there is no optimal strategy for ensuring good implementation of any set of guidelines,<sup>694</sup> there is clearly a role for pancreatologists in this process. By informing specialist and non-specialist colleagues and encouraging them to use these guidelines, by presenting the guidelines at local or national meetings, and by writing about and referring to these guidelines in national and international journals, pancreatologists can optimise their implementation. Some evidence also suggests that instituting a process of audit feedback could increase awareness and improve guideline implementation,<sup>695</sup> These guidelines will also be useful when designing future studies as they reflect the current 'benchmark' for diagnosing and treating CP. This holds particularly true for imaging techniques. The existence of evidence-based guidelines obviously does not relieve clinicians

from their professional obligation to keep up-to-date with new developments in CP. In particular, the results of ongoing RCTs ([www.clinicaltrials.gov](http://www.clinicaltrials.gov)) should be taken into account. How then to decide when to update these guidelines? Some have argued that clinical guidelines should be updated continuously. Although appealing, this is clearly impractical and the HaPanEU working group will use a published framework on how to decide when to initiate an update.<sup>15</sup>

The HaPanEU/UEG evidence-based guidelines on the management of CP should result in reduced variation in practice and an improvement in patient outcome across Europe. The challenge now is to ensure high compliance in clinical practice and future trial design.<sup>453</sup>

## Acknowledgements

The authors wish to thank the UEG and the National Societies for their generous support through the LINK award. They thank the EPC for support and for hosting the HaPanEU home-page.

### Authors of the HaPanEU working group:

Matthias Löhr, Karolinska Institutet and Center for Digestive Diseases, Karolinska University Hospital, Sweden (PI); Enrique Domínguez-Munoz, Dept of Gastroenterology and Foundation for Research in Digestive Diseases, University Hospital of Santiago de Compostela, Santiago de Compostela, Spain; Marc Besselink, AMC Amsterdam, The Netherlands; Julia Mayerle, Dept of Gastroenterology, University of Greifswald, Germany; Jonas Rosendahl, Dept of Gastroenterology, University of Leipzig, Germany; Markus M Lerch, University of Greifswald, Germany; Fatih Akisik, St Vincents Hospital and Medical Center, New York, USA; Nikolaos Kartalis, Department of Radiology, Karolinska University Hospital and Division of Medical Imaging and Technology, CLINTEC, Karolinska Institutet, Stockholm, Sweden; Riccardo Manfredi, Department of Radiology, University of Verona, Italy; Julio Iglesias-Garcia, University Hospital of Santiago d Compostela, Spain; Stephan L Haas, Center for Digestive Diseases, Karolinska University Hospital, Sweden; Jutta Keller, Israelitic Hospital Hamburg, University of Hamburg, Germany; Marja A Boermeester, AMC Amsterdam, The Netherlands; Jens Werner, Ludwig Maximilians University Munich, Munich, Germany; Jean-Marc Dumonceau, University of Geneve, Switzerland; Paul Fockens, AMC Amsterdam, The Netherlands; Julia Mayerle, Dept of Gastroenterology, University of Greifswald, Germany; Asbjørn Drewes, Dept of Gastroenterology, Aarhus University, Denmark; Gürlap Ceyhan, Klinikum rechts der Isar Technical University Munich, Germany; Björn Lindkvist, Göteborgs Universitet, Sweden; Joost P Drenth, Dept of Gastroenterology and Hepatology, Radboudumc, Nijmegen, The Netherlands; Nils Ewald, Justus-Liebig-Universität Giessen, Germany; Philip Hardt, Justus-Liebig-Universität Giessen, Germany; Enrique de Madaria, Hospital General Universitario, Alicante, Spain; Christian Gheorghe, Universitatea Crestina Dimitrie Cantemir, Bukarest, Romania; Fredrik Lindgren, Dept of Pediatrics, Karolinska

University Hospital, Sweden; Alexander Schneider, University Hospital Mannheim, Germany; Heiko Witt, Technical University Munich, Germany; Thomas Bollen, St Antonius Ziekenhuis Nieuwegein, The Netherlands; Piero Boraschi, Azienda Ospedaliero-Division of Diagnostic and Interventional Radiology - Department of Translational Research and New Technologies in Medicine, University of Pisa, Italy; Frøkjær J Brøndum, Aalborg University, Denmark; Sasa Rudolf, Univerzitetni Klinični Center, Maribor, Slovenia; Marco Bruno, Dept of Gastroenterology and Hepatology, Erasmus Medical Centre, Rotterdam, The Netherlands; Georg Dimcevski, Haukeland University Hospital, Bergen, Norway; Marc Giovannini, University of Marseille, France; Aldis Pukitis, Paula Stradina Clinical University Hospital, Latvia; Mariachiara Petrone, Vita-Salute San Raffaele University, Scientific Institute San Raffaele, Milan, Italy; Kofi Oppong, Newcastle upon Tyne Hospital, UK; Basil Ammori, Spire Manchester Hospital, UK; Helmut Friess, Technical Universität München, Germany; Jakob R Izbiki, Hamburg-Eppendorf University Medical Centre, Germany; Paula Ganesh, Department of Molecular and Clinical Cancer Medicine, University of Liverpool, UK; Roberto Salvia, Unit of General and Pancreatic Surgery, G.B. Rossi Hospital, Verona, Italy; Alain Sauvanet, Chirurgie Digestive et Visceral Hôpital Beaujon, Clichy, France; Sorin Barbu, Medicale Spitalul Universitar C.F. Cluj-Napoca, Romania; Vladimir Lyadov, Surgery Department, Medical and Rehabilitation Center, Moscow, Russia; Pierre Deprez, Cliniques Universitaires Saint-Luc, Belgium; Natalja Gubergrits, Donetsk State Medical University, Ukraine; Alexey V Okhlobystiy, Sechenov First Moscow Medical University, Moscow, Russia; Marianna Arvanitakis, Erasme University Hospital ULB, Brussels, Belgium; Guido Costamagna, Università Cattolica del Sacro Cuore, Rome, Italy; Akos Pap, Semmelweis Universität, Budapest, Hungary; Roland Andersson, Clinical Sciences, Lund University Hospital, Lund, Sweden; Truls Hauge, Ullevål University Hospital, Norway; Colin McKay, West of Scotland Pancreatic Unit, Glasgow Royal Infirmary, UK; Aldos Pukitis, Paula Stradina Clinical University Hospital, Latvia; Sara Regnér, Lunds Universitet, Sweden; Peter Dítě, Brno, Czech Republic; Søren S Olesen, Dept of Gastroenterology and Hepatology, Aalborg University Hospital, Denmark; Sinead Duggan, Dept of Clinical Medicine, Trinity College Dublin, Ireland; Andrew Hopper, University of Leicester, UK; Mary Phillips, Cave Run Surgical Specialists, Morehead, Kentucky, USA; Oleg Shvets, Military University, Kiev, Ukraine; Miroslav Vujasinovic, Dept of Internal Medicine, General Hospital Slovenj Gradec, Gosposvetska, Slovenia; Laszlo Czako, First Dept of Medicine, University of Szeged, Hungary; Lorenzo Piemonti, Ospedale San Raffaele, Milano, Italy; Hemant Kocher, Queen Mary, University of London, UK; Vinciane Rebours, Universitaire Hôpital Beaujon, France; Davor Stimac, University of Rijeka, Croatia; Peter Hegyi, Dept of Medicine, University of Szeged, Hungary.

#### Authors that are acknowledged

Lars Aabakken, University of Oslo, Norway; Hana Alguel, Klinikum rechts der Isar, Technische Universität München,

Germany; Åke Andrén-Sandberg, Division of Surgery, Karolinska Institutet, Sweden; Urban Arnelo, Division of Surgery, Karolinska Institutet, Sweden; Claudio Bassi, University of Verona, Italy; Christoph Beglinger, University of Basel, Switzerland; Maximilian Bockhorn, University Medical Center, Hamburg, Germany; Markus W Büchler, University of Heidelberg, Germany; Gabriele Capurso, Gastroenterologia Ospedale Sant'Andrea Roma, Italy; Richard Charnley, Newcastle Hospital, UK; Marco Del Chiaro, Division of Surgery, Karolinska Institutet, Sweden; Gianfranco Delle Favre, Università 'La Sapienza', Roma, Italy; Jacques Deviere, Dept of Gastroenterology at the Erasme University Hospital, Brussel, Belgium,

Mircea Diculescu, Institut Fundeni, Clajs, Romania; Massimo Falconi, University of Verona, Italy; Antonio Farre, Univ Autonoma Hospital San Paulo, Spain; David Fine, University of Southampton, UK; Caj Haglund, University of Helsinki, Finland; Heinz Hammer, Medizinische Universität Graz, Austria; Ulrich T Hopt, Universitätsklinikum Freiburg, Germany; Colin D. Johnson, University of Southampton, UK; Ernst Klar, Rostock University Hospital, Germany; Joachim Mössner, University of Leipzig, Germany; Peter Layer, Israelitisches Krankenhaus, Germany; Johanna Laukkanainen, University of Tampere, Finland; Felix Lluís, Hospital General Universitario de Alicante, Spain; Celso Matos, Université Libre de Bruxelles, Belgium; Peter Naredi, Umeå Universitet, Sweden; John Neoptolemos, University Liverpool, UK; Isto Nordback, Tampere University Hospital, Finland; Bettina Rau, Universität Rostock, Germany; Michael Rünzi, Kliniken Essen Sud, Germany; David Saunders, University of Sheffield, UK; Roland M Schmid, Klinikum rechts der Isar, Technische Universität München, Germany; Ralf Segersvärd, Division of Surgery, Karolinska Institutet, Sweden; Robert Sutton, Biomed Research unit, Liverpool, UK; Generoso Uomo, Azienda Ospedaliera, Napoli, Italy; Ellen Viktil, University of Oslo, Norway.

**Collaborators:** The HaPanEU/UEG working group, comprising the authors of this guideline, consist of a Steering Committee, an Executive Committee, representatives from the supporting National Societies of UEG and the EPC, and expert readers.

**Steering Committee:** Matthias Lühr, Karolinska Institutet and Gastrocentrum, Karolinska University Hospital, Stockholm, Sweden; Enrique Domínguez-Munoz, Dept of Gastroenterology and Foundation for Research in Digestive Diseases, University Hospital of Santiago de Compostela, Santiago de Compostela, Spain; Marc Besselink, AMC Amsterdam, The Netherlands; Julia Mayerle, Dept of Gastroenterology, University of Greifswald, Germany.

#### Executive Committee

WP1 – Aetiology: Jonas Rosendahl, University of Leipzig, Germany; Markus M Lerch, University Greifswald, Germany; Fredrik Lindgren, Division of Pediatrics, Karolinska Institutet, Sweden; Alexander Schneider, Universität Heidelberg, Germany; Heiko Witt, München, Germany.

WP2 – Imaging (CT, MRI/MRCP): Fatih Akisik, St Vincents Hospital and Medical Center New York, USA;

Nikolaos Kartalis, Department of Radiology, Karolinska University Hospital and Division of Medical Imaging and Technology, CLINTEC, Karolinska Institutet, Stockholm, Sweden; Thomas Bollen, St Antonius Ziekenhuis Nieuwegein, The Netherlands; Piero Boraschi, Division of Diagnostic and Interventional Radiology - Department of Translational Research and New Technologies in Medicine, University of Pisa, Italy; Frøkjær Jens Brøndum, Aalborg University, Denmark; Riccardo Manfredi, Department of Radiology, University of Verona, Italy; Sasa Rudolf, Univerzitetni Klinični Center, Maribor, Slovenia.

WP3 – Imaging (US/EUS): Julio Iglesias-Garcia, University Hospital of Santiago de Compostela, Spain; Stephan L. Haas, Center for Digestive Diseases, Karolinska University Hospital, Sweden; Marco Bruno, Dept of Gastroenterology and Hepatology, Erasmus Medical Centre, Rotterdam, The Netherlands; Georg Dimcevski, Haukeland University Hospital, Bergen, Norway; Marc Giovannini, University of Marseille, France; Aldis Pukitis, Paula Stradina Clinical University Hospital, Latvia; Mariachiara Petrone, Vita-Salute San Raffaele University, Scientific Institute San Raffaele, Milan, Italy; Kofi Oppong, Newcastle upon Tyne Hospital, UK.

WP4 – Pancreatic function tests: Jutta Keller, University Heidelberg, Germany; Enrique Dominguez-Munoz, Department of Gastroenterology and Foundation for Research in Digestive Diseases, University Hospital of Santiago de Compostela, Santiago de Compostela, Spain; J.-Matthias Löhr, Karolinska Institutet and Gastrocentrum, Karolinska University Hospital, Stockholm, Sweden; Philip Hardt, University Giessen, Germany.

WP5 – Surgery: Marja A Boermeester, University of Amsterdam, The Netherlands; Jens Werner, Basil Ammori, Spire Manchester Hospital, UK; Marc Besselink, Academic Medical Center, Amsterdam, The Netherlands; Helmut Friess, TUM Universität München, Germany; Jakob R Izbiki, Hamburg-Eppendorf University Medical Centre, Germany; Paula Ganeh, Department of Molecular and Clinical Cancer Medicine University of Liverpool, UK; Roberto Salvia, Unit of General and Pancreatic Surgery G.B. Rossi Hospital, Verona, Italy; Alain Sauvanet, Chirurgie digestive et viscérale Hôpital Beaujon, Clichy, France; Sorin Barbu, Medice Spitalul Universitar C.F. Cluj-Napoca, Romania; Vladimir Lyadov, Surgery Dept, Medical and Rehabilitation Center, Moscow, Russia.

WP6 – Medical therapy (incl. PERT): Enrique Dominguez-Munoz, Dept of Gastroenterology and Foundation for Research in Digestive Diseases, University Hospital of Santiago de Compostela, Santiago de Compostela, Spain; Jutta Keller, Israelitisches Krankenhaus in Hamburg, Hamburg, Germany; Pierre Deprez, Cliniques Universitaires Saint-Luc, Belgium; Natalja Gubergrits, Donetsk State Medical University, Ukraine; J.-Matthias Löhr, Karolinska Institutet and Gastrocentrum, Karolinska University Hospital, Stockholm, Sweden; Alexey V Okhlobystiy, Oregon Health and Science University, USA.

WP7 – Endoscopy (incl. ESWL): Jean-Marc Dumonceau, University of Geneva, Switzerland; Paul Fockens, Gastrointestinal Endoscopy, Faculty of Medicine,

Universiteit van Amsterdam, The Netherlands; Marianna Arvanitakis, Erasme University Hospital ULB. Brussels, Belgium; Guido Costamagna, Università Cattolica del Sacro Cuore, Rome, Italy; Pierre Deprez, Cliniques Universitaires Saint-Luc, Belgium; Marc Giovanni, University of Marseille, France; Akos Pap, Semmelweis Universität, Germany.

WP8 – Pseudocysts and complications: Julia Mayerle, Dept of Gastroenterology, University of Greifswald, Germany; Julio Iglesias Garcia, University Hospital of Santiago de Compostela, Spain; Roland Andersson, Clinical Sciences, Lund University Hospital, Lund, Sweden; Truls Hauge, Ullevål University Hospital, Norway; Colin McKay, West of Scotland Pancreatic Unit, Glasgow Royal Infirmary, UK; Aldos Pukitis, Paula Stradina Clinical University Hospital, Latvia; Sara Regnér, Lunds Universitet, Sweden.

WP9 – Pain: Asbjørn Drewes, Aarhus university, Denmark; Güralp O Cheyan, Klinikum recht der Isar Technische universität München, Germany; Marja A Boermeester, Universiteit van Amsterdam, The Netherlands; Peter Dité, Brno, Czech Republic; Colin McKay, West of Scotland Pancreatic Unit, Glasgow Royal Infirmary, UK; Søren S Olesen, Dept of Gastroenterology and Hepatology, Aalborg University Hospital, Denmark.

WP10 – Nutrition: Björn Lindkvist, Göteborgs Universitet, Sweden; Joost P Drenth, Dept of Gastroenterology and Hepatology of the Radboudumc, Nijmegen, The Netherlands; Sinead Duggan, Dept of Clinical Medicine, Trinity College Dublin, Ireland; Andrew Hopper, University of Leicester, UK; Mary Phillips, Cave Run Surgical Specialists, Morehead, Kentucky, USA; Oleg Shvets, Ukraine; Miroslav Vujasinovic, Dept of Internal Medicine, General Hospital, Slovenj Gradec, Slovenia.

WP11 – Diabetes mellitus: Nils Ewald, Justus-Liebig-Universität Giessen, Germany; Philip Hardt, University Giessen, Germany; Laszlo Czako, University of Szeged, Hungary; Sinead Duggan, Dept of Clinical Medicine, Trinity College Dublin, Ireland; Lorenzo Piemonti, Ospedale San Raffaele, Milano, Italy.

WP12 – Assessment and Quality of Life: Stephan L Haas, Center for Digestive Diseases, Karolinska University Hospital, Sweden; Enrique de Madaria, Hospital General Universitario, Alicante, Spain; Christian Gheorghe, Universitatea Crestina Dimitrie Cantemir, Bukarest, Romania; Hemant Kocher, Queen Mary, University of London, UK; Vinciane Rebours, Universitaire Hôpital Beaujon, France; Davor Stimac, University of Rijeka, Prague, Czech Republic.

#### Representatives of the National Societies in UEG

Hans Törnblom, Swedish Gastroenterology Society (SGF); Markus M Lerch, German Society for Gastroenterological Diseases (DGVS); Peter Hegyi, European Pancreas Club (EPC); Joost P Drenth (UEG/NS).

#### Expert readers

Lars Aabakken, University of Oslo, Norway; Hana Alguel, Klinikum Rechts der Isar Technische Universität München, Germany; Åke Andrén-Sandberg, Division of Surgery, Karolinska Institutet, Sweden; Urban Arnelo, Division of Surgery, Karolinska Institutet, Sweden; Claudio Bassi,

University of Verona, Italy; Christoph Beglinger, University of Basel, Switzerland; Maximilian Bockhorn, University Medical Center, Hamburg, Germany; Markus Büchler, University of Heidelberg, Germany; Gabriele Capurso, Gastroenterologia Ospedale Sant' Andrea Roma, Italy; Richard Charnley, Newcastle Hospital, UK; Marco Del Chiaro, Division of Surgery, Karolinska Institutet, Sweden; Gianfranco Dellefave, Università 'La Sapienza', Roma, Italy; Jacques Deviere, Dept of Gastroenterology, Erasme University Hospital, Brussel, Belgium; Mircea Diclescu, Institut Fundeni, Romania; Massimo Falconi, University of Verona, Italy; Antonio Farre, University Autonoma Hospital San Paulo, Spain; David Fine, Allina Hospital, Minneapolis, USA; Caj Haglund, University of Helsinki, Finland; Heinz Hammer, Medizinische Universität Graz, Austria; Ulrich T Hopt, Universitätsklinikum Freiburg, Germany; Colin Johnson, University of Southampton, UK; Ernst Klar, Rostock University Hospital, Germany; Joachim Mössner, University of Leipzig, Germany; Peter Layer, Israelitisches Krankenhaus, Germany; Johanna Laukkarainen, University of Tampere, Finland; Felix Lluís, Hospital General Universitario de Alicante, Spain; Celso Matos, Université Libre de Bruxelles, Belgium; Peter Naredi, Umeå Universitet, Sweden; John Neoptolemos, University of Liverpool, UK; Isto Nordback, Tampere University Hospital, Finland; Bettina Rau, Universität Rostock, Germany; Sasa Rudolf, University Maribor, Slovenia; Michael Rünzi, Kliniken Essen Süd, Germany; David Sanders, Roland M Schmid, TU München, Germany; Alexander Schneider, Universität Heidelberg, Germany; Ralf Segersvärd, Division of Surgery, Karolinska Institutet, Sweden; Robert Sutton, Biomed Research Unit, Liverpool, UK; Generoso Uomo, Azienda Ospedaliera, Napoli, Italy; Carmen Villalba, Santiago di Chile; Ellen Viktil, Oslo, Norway.

### Declaration of conflicting interests

None declared.

### Funding

HaPanEU was funded by a LINK award from the UEG to the HaPanEU consortium. No further external funding was provided.

### References

- Levy P, Dominguez-Munoz E, Imrie C, et al. Epidemiology of chronic pancreatitis: Burden of the disease and consequences. *United European Gastroenterol J* 2014; 2: 345–354.
- Working Party of the Australasian Pancreatic Club, Smith RC, Smith SF, Wilson J, et al. Summary and recommendations from the Australasian guidelines for the management of pancreatic exocrine insufficiency. *Pancreatology* 2016; 16: 164–180.
- Delhaye M, Van Steenberghe W, Cשמלי E, et al. Belgian consensus on chronic pancreatitis in adults and children: Statements on diagnosis and nutritional, medical, and surgical treatment. *Acta Gastroenterol Belg* 2014; 77: 47–65.
- Hoffmeister A, Mayerle J, Beglinger C, et al. English language version of the S3-consensus guidelines on chronic pancreatitis: Definition, aetiology, diagnostic examinations, medical, endoscopic and surgical management of chronic pancreatitis. *Z Gastroenterol* 2015; 53: 1447–1495.
- Takacs T, Czako L, Dubravcsik Z, et al. [Chronic pancreatitis. Evidence based management guidelines of the Hungarian Pancreatic Study Group]. *Orv Hetil* 2015; 156: 262–288.
- Frulloni L, Falconi M, Gabbriellini A, et al. Italian consensus guidelines for chronic pancreatitis. *Dig Liver Dis* 2010; 42: S381–S406.
- Gheorghie C, Seicean A, Saftoiu A, et al. Romanian guidelines on the diagnosis and treatment of exocrine pancreatic insufficiency. *J Gastrointestin Liver Dis* 2015; 24: 117–123.
- De-Madaria E, Abad-Gonzalez A, Aparicio JR, et al. The Spanish Pancreatic Club's recommendations for the diagnosis and treatment of chronic pancreatitis: Part 2 (treatment). *Pancreatology* 2013; 13: 18–28.
- Martinez J, Abad-Gonzalez A, Aparicio JR, et al. The Spanish Pancreatic Club recommendations for the diagnosis and treatment of chronic pancreatitis: Part 1 (diagnosis). *Pancreatology* 2013; 13: 8–17.
- Shafiq N, Rana S, Bhasin D, et al. Pancreatic enzymes for chronic pancreatitis. *Cochrane Database Syst Rev* 2009; 4: CD006302.
- Löhr JM. UEG LINK Award from the National Societies to HaPanEU: Harmonising the diagnosis and treatment of pancreatitis across Europe. *United European Gastroenterol J* 2015; 3: 483.
- Guyatt GH, Oxman AD, Vist GE, et al. GRADE: An emerging consensus on rating quality of evidence and strength of recommendations. *Br Med J* 2008; 336: 924–926.
- Schunemann HJ, Oxman AD, Brozek J, et al. Grading quality of evidence and strength of recommendations for diagnostic tests and strategies. *Br Med J* 2008; 336: 1106–1110.
- Working Group. IAP/APA evidence-based guidelines for the management of acute pancreatitis. *Pancreatology* 2013; 13: e1–e15.
- Shekelle P, Eccles MP, Grimshaw JM, et al. When should clinical guidelines be updated? *Br Med J* 2001; 323: 155–157.
- Klöppel G and Maillet B. Pathology of acute and chronic pancreatitis. *Pancreas* 1993; 8: 659–670.
- Ahmed Ali U, Issa Y, Hagensars JC, et al. Risk of recurrent pancreatitis and progression to chronic pancreatitis after a first episode of acute pancreatitis. *Clin Gastroenterol Hepatol* 2016; 14: 738–746.
- Witt H, Apte MV, Keim V, et al. Chronic pancreatitis: Challenges and advances in pathogenesis, genetics, diagnosis, and therapy. *Gastroenterology* 2007; 132: 1557–1573.
- Lowenfels AB, Maisonneuve P, Cavallini G, et al. Pancreatitis and the risk of pancreatic cancer. International Pancreatitis Study Group. *N Engl J Med* 1993; 328: 1433–1437.

20. Dufour MC and Adamson MD. The epidemiology of alcohol-induced pancreatitis. *Pancreas* 2003; 27: 286–290.
21. Durbec JP and Sarles H. Multicenter survey of the etiology of pancreatic diseases. Relationship between the relative risk of developing chronic pancreatitis and alcohol, protein and lipid consumption. *Digestion* 1978; 18: 337–350.
22. Johnson CD and Hosking S. National statistics for diet, alcohol consumption, and chronic pancreatitis in England and Wales, 1960–88. *Gut* 1991; 32: 1401–1405.
23. Lin Y, Tamakoshi A, Hayakawa T and Ohno Y.; Research Committee on Intractable Pancreatic Disease. Associations of alcohol drinking and nutrient intake with chronic pancreatitis: Findings from a case-control study in Japan. *Am J Gastroenterol* 2001; 96: 2622–2627.
24. Maruyama K and Otsuki M. Incidence of alcoholic pancreatitis in Japanese alcoholics: Survey of male sobriety association members in Japan. *Pancreas* 2007; 34: 63–65.
25. Sarles H, Cros RC and Bidart JM. A multicenter inquiry into the etiology of pancreatic diseases. *Digestion* 1979; 19: 110–125.
26. Stigendal L and Olsson R. Alcohol consumption pattern and serum lipids in alcoholic cirrhosis and pancreatitis. A comparative study. *Scand J Gastroenterol* 1984; 19: 582–587.
27. Talamini G, Bassi C, Falconi M, et al. Alcohol and smoking as risk factors in chronic pancreatitis and pancreatic cancer. *Dig Dis Sci* 1999; 44: 1303–1311.
28. Maisonneuve P, Lowenfels AB, Mullhaupt B, et al. Cigarette smoking accelerates progression of alcoholic chronic pancreatitis. *Gut* 2005; 54: 510–514.
29. Whitcomb DC, Gorry MC, Preston RA, et al. Hereditary pancreatitis is caused by a mutation in the cationic trypsinogen gene. *Nat Genet* 1996; 14: 141–145.
30. Witt H, Luck W, Hennies HC, et al. Mutations in the gene encoding the serine protease inhibitor, Kazal type 1 are associated with chronic pancreatitis. *Nat Genet* 2000; 25: 213–216.
31. Sharer N, Schwarz M, Malone G, et al. Mutations of the cystic fibrosis gene in patients with chronic pancreatitis. *N Eng J Med* 1998; 339: 645–652.
32. Rosendahl J, Witt H, Szmola R, et al. Chymotrypsin C (CTRC) variants that diminish activity or secretion are associated with chronic pancreatitis. *Nat Genet* 2008; 40: 78–82.
33. Witt H, Beer S, Rosendahl J, et al. Variants in CPA1 are strongly associated with early onset chronic pancreatitis. *Nat Genet* 2013; 45: 1216–1220.
34. Fjeld K, Weiss FU, Lasher D, et al. A recombined allele of the lipase gene CEL and its pseudogene CELP confers susceptibility to chronic pancreatitis. *Nat Genet* 2015; 47: 518–522.
35. Shimosegawa T, Chari ST, Frulloni L, et al. International consensus diagnostic criteria for autoimmune pancreatitis: Guidelines of the International Association of Pancreatology. *Pancreas* 2011; 40: 352–358.
36. Pant C and Sferra TJ. Emergency department visits and hospitalizations in children with chronic pancreatitis in the United States. *J Pediatr Gastroenterol Nutr* 2015; 61: 568–570.
37. Parniczky A, Czako L, Dubravcsik Z, et al. [Pediatric pancreatitis. Evidence based management guidelines of the Hungarian Pancreatic Study Group]. *Orv Hetil* 2015; 156: 308–325.
38. Jupp J, Fine D and Johnson CD. The epidemiology and socioeconomic impact of chronic pancreatitis. *Best Pract Res Clin Gastroenterol* 2010; 24: 219–231.
39. Witt H, Sahin-Tóth M, Landt O, et al. A degradation-sensitive anionic trypsinogen (PRSS2) variant protects against chronic pancreatitis. *Nat Genet* 2006; 38: 668–673.
40. Shwachman H, Leberthal E and Khaw KT. Recurrent acute pancreatitis in patients with cystic fibrosis with normal pancreatic enzymes. *Pediatrics* 1975; 55: 86–95.
41. Durno C, Corey M, Zielenski J, et al. Genotype and phenotype correlations in patients with cystic fibrosis and pancreatitis. *Gastroenterology* 2002; 123: 1857–1864.
42. Lowenfels AB, Maisonneuve P and Sullivan T. The changing character of acute pancreatitis: Epidemiology, etiology, and prognosis. *Curr Gastroenterol Rep* 2009; 11: 97–103.
43. Delatycki MB, Burke J, Christie L, et al. Human Genetics Society of Australasia position statement: Population-based carrier screening for cystic fibrosis. *Twin Res Hum Genet* 2014; 17: 578–583.
44. Rosendahl J, Landt O, Bernadova J, et al. CFTR, SPINK1, CTRC and PRSS1 variants in chronic pancreatitis: Is the role of mutated CFTR overestimated? *Gut* 2013; 62: 582–592.
45. Weiss FU, Simon P, Bogdanova N, et al. Complete cystic fibrosis transmembrane conductance regulator gene sequencing in patients with idiopathic chronic pancreatitis and controls. *Gut* 2005; 54: 1456–1460.
46. Kamisawa T, Chari ST, Giday SA, et al. Clinical profile of autoimmune pancreatitis and its histological subtypes: An international multicentre survey. *Pancreas* 2011; 40: 809–814.
47. Hart PA, Kamisawa T, Brugge WR, et al. Long-term outcomes of autoimmune pancreatitis: A multicentre, international analysis. *Gut* 2013; 62: 1771–1776.
48. Chari ST, Kloppel G, Zhang L, et al. Histopathologic and clinical subtypes of autoimmune pancreatitis: The Honolulu consensus document. *Pancreas* 2010; 39: 549–554.
49. Kamisawa T, Egawa N and Nakajima H. Autoimmune pancreatitis is a systemic autoimmune disease. *Am J Gastroenterol* 2003; 98: 2811–2812.
50. Sah RP, Chari ST, Pannala R, et al. Differences in clinical profile and relapse rate of type 1 versus type 2 autoimmune pancreatitis. *Gastroenterology* 2010; 139: 140–148; quiz e12–e13.
51. Detlefsen S, Löhr JM, Drewes AM, et al. Current concepts in the diagnosis and treatment of type 1 and type 2 autoimmune pancreatitis. *Rec Pat Inflamm Allergy Drug Disc* 2011; 5: 136–149.
52. Chari ST, Smyrk TC, Levy MJ, et al. Diagnosis of autoimmune pancreatitis: The Mayo Clinic experience. *Clin Gastroenterol Hepatol* 2006; 4: 1010–1016; quiz 934.
53. Frulloni L, Scattolini C, Falconi M, et al. Autoimmune pancreatitis: Differences between the focal and diffuse

- forms in 87 patients. *Am J Gastroenterol* 2009; 104: 2288–2294.
54. Kamisawa T, Yoshiike M, Egawa N, et al. Treating patients with autoimmune pancreatitis: Results from a long-term follow-up study. *Pancreatology* 2005; 5: 234–238; discussion 238–40.
55. Van Heerde MJ, Buijs J, Rauws EA, et al. A comparative study of diagnostic scoring systems for autoimmune pancreatitis. *Pancreas* 2014; 43: 559–564.
56. Frulloni L, Lunardi C, Simone R, et al. Identification of a novel antibody associated with autoimmune pancreatitis. *N Engl J Med* 2009; 361: 2135–2142.
57. Löhr JM, Faissner R, Koczan D, et al. Autoantibodies against the exocrine pancreas in autoimmune pancreatitis: Gene and protein expression profiling and immunoassays identify pancreatic enzymes as a major target of the inflammatory process. *Am J Gastroenterol* 2010; 105: 2060–2071.
58. Bagul A and Siriwardena AK. Evaluation of the Manchester classification system for chronic pancreatitis. *J Pancreas* 2006; 7: 390–396.
59. Büchler MW, Martignoni ME, Friess H, et al. A proposal for a new clinical classification of chronic pancreatitis. *BMC Gastroenterol* 2009; 9: 93.
60. Ramesh H. Proposal for a new grading system for chronic pancreatitis: The ABC system. *J Clin Gastroenterol* 2002; 35: 67–70.
61. Catalano MF, Sahai A, Levy M, et al. EUS-based criteria for the diagnosis of chronic pancreatitis: The Rosemont classification. *Gastrointest Endosc* 2009; 69: 1251–1261.
62. Schneider A, Löhr JM and Singer MV. The M-ANNHEIM classification of chronic pancreatitis: Introduction of a unifying classification system based on a review of previous classifications of the disease. *J Gastroenterol* 2007; 42: 101–119.
63. He YX, Xu HW, Sun XT, et al. Endoscopic management of early-stage chronic pancreatitis based on M-ANNHEIM classification system: A prospective study. *Pancreas* 2014; 43: 829–833.
64. Diaconu BL, Ciobanu L, Mocan T, et al. Investigation of the SPINK1 N34S mutation in Romanian patients with alcoholic chronic pancreatitis. A clinical analysis based on the criteria of the M-ANNHEIM classification. *J Gastrointest Liver Dis* 2009; 18: 143–150.
65. Lang MB, Segersvärd R, Grundsten M, et al. Management of alcohol use disorders in patients with chronic pancreatitis. *J Pancreas* 2012; 13: 654–659.
66. Braganza JM, Lee SH, McCloy RF, et al. Chronic pancreatitis. *Lancet* 2011; 377: 1184–1197.
67. Etemad B and Whitcomb DC. Chronic pancreatitis: Diagnosis, classification, and new genetic developments. *Gastroenterology* 2001; 120: 682–707.
68. Howes N, Lerch MM, Greenhalf W, et al. Clinical and genetic characteristics of hereditary pancreatitis in Europe. *Clin Gastroenterol Hepatol* 2004; 2: 252–261.
69. Keim V, Bauer N, Teich N, et al. Clinical characterization of patients with hereditary pancreatitis and mutations in the cationic trypsinogen gene. *Am J Med* 2001; 111: 622–626.
70. Schneider A and Pfützer RH. Treatment of alcoholic pancreatitis. *Dig Dis Sci* 2005; 23: 241–246.
71. Talamini G, Bassi C, Falconi M, et al. Pain relapses in the first 10 years of chronic pancreatitis. *Am J Surg* 1996; 171: 565–569.
72. Lowenfels AB, Maisonneuve P, DiMagna EP, et al. Hereditary pancreatitis and the risk of pancreatic cancer. International Hereditary Pancreatitis Study Group. *J Natl Cancer Inst* 1997; 19: 442–446.
73. Raimondi S, Lowenfels AB, Morselli-Labate AM, et al. Pancreatic cancer in chronic pancreatitis: Aetiology, incidence, and early detection. *Best Pract Res Clin Gastroenterol* 2010; 24: 349–358.
74. Bang UC, Benfield T, Hyldstrup L, et al. Mortality, cancer, and comorbidities associated with chronic pancreatitis: A Danish nationwide matched-cohort study. *Gastroenterology* 2014; 146: 989–994.
75. Bertin C, Pelletier AL, Vullierme MP, et al. Pancreas divisum is not a cause of pancreatitis by itself but acts as a partner of genetic mutations. *Am J Gastroenterol* 2012; 107: 311–317.
76. Issa Y, Kempeneers MA, van Santvoort H, et al. Diagnostic performance of imaging modalities in chronic pancreatitis: A systematic review and meta-analysis. *Eur J Radiol* 2017; in press.
77. Ammann RW. The natural history of alcoholic chronic pancreatitis. *Intern Med* 2001; 40: 368–375.
78. Anderson SW and Soto JA. Pancreatic duct evaluation: Accuracy of portal venous phase 64 MDCT. *Abdom Imaging* 2009; 34: 55–63.
79. Takehara Y, Ichijo K, Tooyama N, et al. Breath-hold MR cholangiopancreatography with a long-echo-train fast spin-echo sequence and a surface coil in chronic pancreatitis. *Radiology* 1994; 192: 73–78.
80. Sica GT, Braver J, Cooney MJ, et al. Comparison of endoscopic retrograde cholangiopancreatography with MR cholangiopancreatography in patients with pancreatitis. *Radiology* 1999; 210: 605–610.
81. Hellerhoff KJ, Helmberger H 3rd, Rosch T, et al. Dynamic MR pancreatography after secretin administration: Image quality and diagnostic accuracy. *AJR Am J Roentgenol* 2002; 179: 121–129.
82. Manfredi R, Lucidi V, Gui B, et al. Idiopathic chronic pancreatitis in children: MR cholangiopancreatography after secretin administration. *Radiology* 2002; 224: 675–682.
83. Manfredi R, Costamagna G, Brizi MG, et al. Severe chronic pancreatitis versus suspected pancreatic disease: Dynamic MR cholangiopancreatography after secretin stimulation. *Radiology* 2000; 214: 849–855.
84. Bali MA, Sztantics A, Metens T, et al. Quantification of pancreatic exocrine function with secretin-enhanced magnetic resonance cholangiopancreatography: Normal values and short-term effects of pancreatic duct drainage procedures in chronic pancreatitis. Initial results. *Eur Radiol* 2005; 15: 2110–2121.
85. Balci NC, Smith A, Momtahan AJ, et al. MRI and S-MRCP findings in patients with suspected chronic pancreatitis: Correlation with endoscopic pancreatic function testing (ePFT). *J Magn Reson Imaging* 2010; 31: 601–606.

86. Nicaise N, Pellet O, Metens T, et al. Magnetic resonance cholangiopancreatography: Interest of IV secretin administration in the evaluation of pancreatic ducts. *Eur Radiol* 1998; 8: 16–22.
87. Puryrsko AS, Gandhi NS, Walsh RM, et al. Does secretin stimulation add to magnetic resonance cholangiopancreatography in characterising pancreatic cystic lesions as side-branch intraductal papillary mucinous neoplasm? *Eur Radiol* 2014; 24: 3134–3141.
88. Matos C, Metens T, Deviere J, et al. Pancreatic duct: Morphologic and functional evaluation with dynamic MR pancreatography after secretin stimulation. *Radiology* 1997; 203: 435–441.
89. Cappeliez O, Delhaye M, Deviere J, et al. Chronic pancreatitis: Evaluation of pancreatic exocrine function with MR pancreatography after secretin stimulation. *Radiology* 2000; 215: 358–364.
90. Sarner M and Cotton PB. Classification of pancreatitis. Report of an international symposium at Cambridge. *Gut* 1984; 25: 756–759.
91. Remer EM and Baker ME. Imaging of chronic pancreatitis. *Radiol Clin N Am* 2002; 40: 1229–1242.
92. Martinez-Noguera A and D’Onofrio M. Ultrasonography of the pancreas. 1. Conventional imaging. *Abdom Imaging* 2007; 32: 136–149.
93. Shmulewitz A, Teefey SA and Robinson BS. Factors affecting image quality and diagnostic efficacy in abdominal sonography: A prospective study of 140 patients. *J Clin Ultrasound* 1993; 21: 623–630.
94. Alpern MB, Sandler MA, Kellman GM, et al. Chronic pancreatitis: Ultrasonic features. *Radiology* 1985; 155: 215–219.
95. Homma T, Harada H and Koizumi M. Diagnostic criteria for chronic pancreatitis by the Japan Pancreas Society. *Pancreas* 1997; 15: 14–15.
96. Jones SN, Lees WR and Frost RA. Diagnosis and grading of chronic pancreatitis by morphological criteria derived by ultrasound and pancreatography. *Clin Radiol* 1988; 39: 43–48.
97. Tsao TF, Kang RJ, Tyan YS, et al. Color Doppler twinkling artifact related to chronic pancreatitis with parenchymal calcification. *Acta Radiol* 2006; 47: 547–548.
98. Bertolotto M, D’Onofrio M, Martone E, et al. Ultrasonography of the pancreas. 3. Doppler imaging. *Abdom Imaging* 2007; 32: 161–170.
99. Law R, Bronner M, Vogt D, et al. Autoimmune pancreatitis: A mimic of pancreatic cancer. *Cleveland Clin J Med* 2009; 76: 607–615.
100. Luetmer PH, Stephens DH and Ward EM. Chronic pancreatitis: Reassessment with current CT. *Radiology* 1989; 171: 353–357.
101. Siddiqi AJ and Miller F. Chronic pancreatitis: Ultrasound, computed tomography, and magnetic resonance imaging features. *Semin Ultrasound CT MR* 2007; 28: 384–394.
102. Shawker TH, Linzer M and Hubbard VS. Chronic pancreatitis: The diagnostic significance of pancreatic size and echo amplitude. *J Ultrasound Med* 1984; 3: 267–272.
103. Strobel D, Bernatik T, Blank W, et al. Incidence of bleeding in 8172 percutaneous ultrasound-guided intraabdominal diagnostic and therapeutic interventions – results of the prospective multicenter DEGUM interventional ultrasound study (PIUS study). *Ultraschall Med* 2015; 36: 122–131.
104. Kersting S, Konopke R, Kersting F, et al. Quantitative perfusion analysis of transabdominal contrast-enhanced ultrasonography of pancreatic masses and carcinomas. *Gastroenterology* 2009; 137: 1903–1911.
105. D’Onofrio M, Malago R and Zamboni G. Contrast-enhanced ultrasonography better identifies pancreatic tumor vascularization than helical CT. *Pancreatology* 2005; 5: 98–402.
106. D’Onofrio M, Martone E, Malagò R, et al. Contrast-enhanced ultrasonography of the pancreas. *J Pancreas* 2007; 8: S71–S76.
107. D’Onofrio M, Zamboni G, Tognolini A, et al. Mass-forming pancreatitis: Value of contrast-enhanced ultrasonography. *World J Gastroenterol* 2006; 12: 4181–4184.
108. Beyer-Enke SA, Hocke M, Ignee A, et al. Contrast enhanced transabdominal ultrasound in the characterisation of pancreatic lesions with cystic appearance. *J Pancreas* 2010; 11: 427–433.
109. Dietrich CF, Braden B, Hocke M, et al. Improved characterisation of solitary solid pancreatic tumours using contrast enhanced transabdominal ultrasound. *J Cancer Res Clin Oncol* 2008; 134: 635–643.
110. Faccioli N, Crippa S, Bassi C, et al. Contrast-enhanced ultrasonography of the pancreas. *Pancreatology* 2009; 9: 560–566.
111. Postema M and Gilja OH. Contrast-enhanced and targeted ultrasound. *World J Gastroenterol* 2011; 17: 28–41.
112. Takeda K, Goto H, Hirooka Y, et al. Contrast-enhanced transabdominal ultrasonography in the diagnosis of pancreatic mass lesions. *Acta Radiol* 2003; 44: 103–106.
113. Kersting S, Roth J and Bunk A. Transabdominal contrast-enhanced ultrasonography of pancreatic cancer. *Pancreatology* 2011; 11: S20–S27.
114. Iglesias-Garcia J, Lariño-Noia J, et al. Endoscopic ultrasound in the diagnosis of chronic pancreatitis. *Rev Esp Enferm Dig* 2015; 107: 222–229.
115. Kahl S, Glasbrenner B, Leodolter A, et al. EUS in the diagnosis of early chronic pancreatitis: A prospective follow-up study. *Gastrointest Endosc* 2002; 55: 507–511.
116. Lees WR, Vallon AG, Denyer ME, et al. Prospective study of ultrasonography in chronic pancreatic disease. *Br Med J* 1979; 1: 162–164.
117. Wiersema MJ, Hawes RH, Lehman GA, et al. Prospective evaluation of endoscopic ultrasonography and endoscopic retrograde cholangiopancreatography in patients with chronic abdominal pain of suspected pancreatic origin. *Endoscopy* 1993; 25: 555–564.
118. Stevens T, Dumot JA, Parsi MA, et al. Combined endoscopic ultrasound and secretin endoscopic pancreatic function test in patients evaluated for chronic pancreatitis. *Dig Dis Sci* 2010; 55: 2681–2687.
119. Chong AK, Hawes RH, Hoffman BJ, et al. Diagnostic performance of EUS for chronic pancreatitis: A

- comparison with histopathology. *Gastrointest Endosc* 2007; 65: 808–814.
120. Albashir S, Bronner MP, Parsi MA, et al. Endoscopic ultrasound, secretin endoscopic pancreatic function test, and histology: Correlation in chronic pancreatitis. *Am J Gastroenterol* 2010; 105: 2498–2503.
  121. Varadarajulu S, Eltoum I, Tamhane A, et al. Histopathologic correlates of noncalcific chronic pancreatitis by EUS: A prospective tissue characterization study. *Gastrointest Endosc* 2007; 66: 501–509.
  122. Iglesias-Garcia J, Lindkvist B, Larino-Noia J, et al. The role of EUS in relation to other imaging modalities in the differential diagnosis between mass forming chronic pancreatitis, autoimmune pancreatitis and ductal pancreatic adenocarcinoma. *Rev Esp Enferm Dig* 2012; 104: 315–321.
  123. Brand RE, Lerch MM, Rubinstein WS, et al. Advances in counselling and surveillance of patients at risk for pancreatic cancer. *Gut* 2007; 56: 1460–1469.
  124. Canto MI, Harinck F, Hruban RH, et al. International Cancer of the Pancreas Screening (CAPS) Consortium summit on the management of patients with increased risk for familial pancreatic cancer. *Gut* 2013; 62: 339–347.
  125. Canto MI, Goggins M, Hruban RH, et al. Screening for early pancreatic neoplasia in high-risk individuals: A prospective controlled study. *Clin Gastroenterol Hepatol* 2006; 4: 766–781; quiz 665.
  126. Kinney TP and Freeman ML. Recent advances and novel methods in pancreatic imaging. *Minerva Gastroenterol Dietol* 2008; 54: 85–95.
  127. Akisik MF, Aisen AM, Sandrasegaran K, et al. Assessment of chronic pancreatitis: Utility of diffusion-weighted MR imaging with secretin enhancement. *Radiology* 2009; 250: 103–109.
  128. Raut CP, Grau AM, Staerckel GA, et al. Diagnostic accuracy of endoscopic ultrasound-guided fine-needle aspiration in patients with presumed pancreatic cancer. *J Gastrointest Surg* 2003; 7: 118–126; discussion 27–28.
  129. Eloubeidi MA, Chen VK, Eltoum IA, et al. Endoscopic ultrasound-guided fine needle aspiration biopsy of patients with suspected pancreatic cancer: Diagnostic accuracy and acute and 30-day complications. *Am J Gastroenterol* 2003; 98: 2663–2668.
  130. Ardengh JC, Lopes CV, de Lima LFP, et al. Diagnosis of pancreatic tumors by endoscopic ultrasound-guided fine-needle aspiration. *World J Gastroenterol* 2007; 13: 3112–3116.
  131. Iglesias-Garcia J, Dominguez-Munoz E, Lozano-Leon A, et al. Impact of endoscopic ultrasound-guided fine needle biopsy for diagnosis of pancreatic masses. *World J Gastroenterol* 2007; 13: 289–293.
  132. Iglesias-Garcia J, Dominguez-Munoz JE, Abdulkader I, et al. Influence of on-site cytopathology evaluation on the diagnostic accuracy of endoscopic ultrasound-guided fine needle aspiration (EUS-FNA) of solid pancreatic masses. *Am J Gastroenterol* 2011; 106: 1705–1710.
  133. Turner BG, Cizginer S, Agarwal DP, et al. Diagnosis of pancreatic neoplasia with EUS and FNA: A report of accuracy. *Gastrointest Endosc* 2010; 71: 91–98.
  134. Varadarajulu S, Tamhane A and Eloubeidi MA. Yield of EUS-guided FNA of pancreatic masses in the presence or the absence of chronic pancreatitis. *Gastrointest Endosc* 2005; 62: 728–736; quiz 51.
  135. Will U, Mueller A, Topalidis T, et al. Value of endoscopic ultrasonography-guided fine needle aspiration (FNA) in the diagnosis of neoplastic tumor (-like) pancreatic lesions in daily clinical practice. *Ultraschall Med* 2010; 31: 169–174.
  136. Fritscher-Ravens A, Brand L, Knöfel WT, et al. Comparison of endoscopic ultrasound-guided fine needle aspiration for focal pancreatic lesions in patients with normal parenchyma and chronic pancreatitis. *Am J Gastroenterol* 2002; 97: 2768–2775.
  137. Krishna NB, Mehra M, Reddy AV, et al. EUS/EUS-FNA for suspected pancreatic cancer: Influence of chronic pancreatitis and clinical presentation with or without obstructive jaundice on performance characteristics. *Gastrointest Endosc* 2009; 70: 70–79.
  138. Takahashi K, Yamao K, Okubo K, et al. Differential diagnosis of pancreatic cancer and focal pancreatitis by using EUS-guided FNA. *Gastrointest Endosc* 2005; 61: 76–79.
  139. Choi SY, Kim SH, Kang TW, et al. Differentiating mass-forming autoimmune pancreatitis from pancreatic ductal adenocarcinoma on the basis of contrast-enhanced MRI and DWI findings. *AJR Am J Roentgenol* 2016; 206: 291–300.
  140. Kanno A, Masamune A, Fujishima F, et al. Diagnosis of autoimmune pancreatitis by EUS-guided FNA using a 22-gauge needle: A prospective multicenter study. *Gastrointest Endosc* 2016; 84: 797–804.
  141. Detlefsen S, Mohr Drewes A, Vyberg M, et al. Diagnosis of autoimmune pancreatitis by core needle biopsy: Application of six microscopic criteria. *Virchows Arch* 2009; 454: 531–539.
  142. Kim JK, Altun E, Elias J, et al. Focal pancreatic mass: Distinction of pancreatic cancer from chronic pancreatitis using gadolinium-enhanced 3D-gradient-echo MRI. *J Magn Reson Imaging* 2007; 26: 313–322.
  143. Iglesias-Garcia J and Domínguez-Muñoz JE. Endoscopic ultrasound image enhancement elastography. *Gastrointest Endosc Clin N Am* 2012; 22: 333–348.
  144. Giovannini M, Hookey LC, Bories E, et al. Endoscopic ultrasound elastography: The first step towards virtual biopsy? Preliminary results in 49 patients. *Endoscopy* 2006; 38: 344–348.
  145. Giovannini M, Botelberge T, Bories E, et al. Endoscopic ultrasound elastography for evaluation of lymph nodes and pancreatic masses: A multicenter study. *World J Gastroenterol* 2009; 15: 1587–1593.
  146. Iglesias-Garcia J, Larino-Noia J, Abdulkader I, et al. EUS elastography for the characterization of solid pancreatic masses. *Gastrointest Endosc* 2009; 70: 1101–1108.
  147. Hirche TO, Ignee A, Barreiros AP, et al. Indications and limitations of endoscopic ultrasound elastography for



- evaluation of focal pancreatic lesions. *Endoscopy* 2008; 40: 910–917.
148. Saftoiu A, Vilmann P, Gorunescu F, et al. Neural network analysis of dynamic sequences of EUS elastography used for differential diagnosis of chronic pancreatitis and pancreatic cancer. *Gastrointest Endosc* 2008; 68: 1086–1094.
149. Iglesias-Garcia J, Larino-Noia J, Abdulkader I, et al. Quantitative endoscopic ultrasound elastography: An accurate method for the differentiation of solid pancreatic masses. *Gastroenterology* 2010; 139: 1172–1180.
150. Saftoiu A, Vilmann P, Gorunescu F, et al. Accuracy of endoscopic ultrasound elastography used for differential diagnosis of focal pancreatic masses: A multicenter study. *Endoscopy* 2011; 43: 596–603.
151. Saftoiu A, Vilmann P, Gorunescu F, et al. Efficacy of an artificial neural network-based approach to endoscopic ultrasound elastography in diagnosis of focal pancreatic masses. *Clin Gastroenterol Hepatol* 2012; 10: 84–90.
152. Opacic D, Rustemovic N, Kalauz M, et al. Endoscopic ultrasound elastography strain histograms in the evaluation of patients with pancreatic masses. *World J Gastroenterol* 2015; 21: 4014–4019.
153. Kongkam P, Lakananurak N, Navicharern P, et al. Combination of EUS-FNA and elastography (strain ratio) to exclude malignant solid pancreatic lesions: A prospective single-blinded study. *J Gastroenterol Hepatol* 2015; 30: 1683–1689.
154. Li X, Xu W, Shi J, et al. Endoscopic ultrasound elastography for differentiating between pancreatic adenocarcinoma and inflammatory masses: A meta-analysis. *World J Gastroenterol* 2013; 19: 6284–6291.
155. Ying L, Lin X, Xie ZL, et al. Clinical utility of endoscopic ultrasound elastography for identification of malignant pancreatic masses: A meta-analysis. *J Gastroenterol Hepatol* 2013; 28: 1434–1443.
156. Hu DM, Gong TT and Zhu Q. Endoscopic ultrasound elastography for differential diagnosis of pancreatic masses: A meta-analysis. *Dig Dis Sci* 2013; 58: 1125–1131.
157. Mei M, Ni J, Liu DL, et al. EUS elastography for diagnosis of solid pancreatic masses: A meta-analysis. *Gastrointest Endosc* 2013; 77: 578–589.
158. Alvarez-Sánchez MV and Napoléon B. Contrast-enhanced harmonic endoscopic ultrasound imaging basic principles present situation and future perspectives. *World J Gastroenterol* 2014; 20: 15549–15563.
159. Fusaroli P, Spada A, Mancino MG, et al. Contrast harmonic echo-endoscopic ultrasound improves accuracy in diagnosis of solid pancreatic masses. *Clin Gastroenterol Hepatol* 2010; 8: 629–634.
160. Napoleon B, Alvarez-Sanchez MV, Gincoul R, et al. Contrast-enhanced harmonic endoscopic ultrasound in solid lesions of the pancreas: Results of a pilot study. *Endoscopy* 2010; 42: 564–570.
161. Seicean A, Badea R, Stan-Iuga R, et al. Quantitative contrast-enhanced harmonic endoscopic ultrasonography for the discrimination of solid pancreatic masses. *Ultraschall Med* 2010; 31: 571–576.
162. Săftoiu A, Vilmann P, Dietrich CF, et al. Quantitative contrast-enhanced harmonic EUS in differential diagnosis of focal pancreatic masses (with videos). *Gastrointest Endosc* 2015; 82: 59–69.
163. Sugimoto M, Takagi T, Hikichi T, et al. Conventional versus contrast-enhanced harmonic endoscopic ultrasonography-guided fine-needle aspiration for diagnosis of solid pancreatic lesions: A prospective randomized trial. *Pancreatol* 2015; 15: 538–541.
164. Hou X, Jin Z, Xu C, et al. Contrast-enhanced harmonic endoscopic ultrasound-guided fine-needle aspiration in the diagnosis of solid pancreatic lesions: A retrospective study. *PLoS One* 2015; 10: e0121236.
165. Wallace MB, Hawes RH, Durkalski V, et al. The reliability of EUS for the diagnosis of chronic pancreatitis: Interobserver agreement among experienced endosonographers. *Gastrointest Endosc* 2001; 53: 294–299.
166. Lankisch PG, Schmidt I, König H, et al. Faecal elastase 1: Not helpful in diagnosing chronic pancreatitis associated with mild to moderate exocrine pancreatic insufficiency. *Gut* 1998; 42: 551–554.
167. DiMagno EP, Go VL and Summerskill WH. Relations between pancreatic enzyme outputs and malabsorption in severe pancreatic insufficiency. *N Eng J Med* 1973; 288: 813–815.
168. Benini L, Amodio A, Campagnola P, et al. Fecal elastase-1 is useful in the detection of steatorrhea in patients with pancreatic diseases but not after pancreatic resection. *Pancreatol* 2013; 13: 38–42.
169. Pezzilli R, Andriulli A, Bassi C, et al. Exocrine pancreatic insufficiency in adults: A shared position statement of the Italian association for the study of the pancreas. *World J Gastroenterol* 2013; 19: 7930–7946.
170. Haaber AB, Rosenfalck AM, Hansen B, et al. Bone mineral metabolism, bone mineral density, and body composition in patients with chronic pancreatitis and pancreatic exocrine insufficiency. *Int J Pancreatol* 2000; 27: 21–27.
171. Kalvaria I, Labadarios D, Shephard GS, et al. Biochemical vitamin E deficiency in chronic pancreatitis. *Int J Pancreatol* 1986; 1: 119–128.
172. Mann ST, Stracke H, Lange U, et al. Alterations of bone mineral density and bone metabolism in patients with various grades of chronic pancreatitis. *Metabolism* 2003; 52: 579–585.
173. Haas SL, Krins S, Knauerhase A, et al. Altered bone metabolism and bone density in patients with chronic pancreatitis and pancreatic exocrine insufficiency. *J Pancreas* 2015; 16: 58–62.
174. Mann ST, Mann V, Stracke H, et al. Fecal elastase 1 and vitamin D3 in patients with osteoporotic bone fractures. *Eur J Med Res* 2008; 13: 68–72.
175. Löhr JM, Oliver MR and Frulloni L. Synopsis of recent guidelines on pancreatic exocrine insufficiency. *United European Gastroenterol J* 2013; 1: 79–83.
176. Seiler CM, Izbicki J, Varga-Szabó L, et al. Randomised clinical trial: A 1-week, double-blind, placebo-controlled study of pancreatin 25 000 Ph. Eur. minimicrospheres (Creon 25000 MMS) for pancreatic exocrine

- insufficiency after pancreatic surgery, with a 1-year open-label extension. *Aliment Pharmacol Ther* 2013; 37: 691–702.
177. Keller J and Layer P. Human pancreatic exocrine response to nutrients in health and disease. *Gut* 2005; 54: vi1–vi28.
  178. Löhr JM. *Pancreatic exocrine insufficiency*, 2nd ed. Bremen: Unimed, 2010.
  179. Gibson-Corley KN, Meyerholz DK and Engelhardt JF. Pancreatic pathophysiology in cystic fibrosis. *J Pathol* 2015; 238: 311–320.
  180. Boreham B and Ammori BJ. A prospective evaluation of pancreatic exocrine function in patients with acute pancreatitis: Correlation with extent of necrosis and pancreatic endocrine insufficiency. *Pancreatol* 2003; 3: 303–308.
  181. Pezzilli R. Chronic pancreatitis: Maldigestion, intestinal ecology and intestinal inflammation. *World J Gastroenterol* 2009; 15: 1673–1676.
  182. Frulloni L, Scattolini C, Katsotourchi AM, et al. Exocrine and endocrine pancreatic function in 21 patients suffering from autoimmune pancreatitis before and after steroid treatment. *Pancreatol* 2010; 10: 129–133.
  183. El Newihi H, Dooley CP, Saad C, et al. Impaired exocrine pancreatic function in diabetics with diarrhea and peripheral neuropathy. *Dig Dis Sci* 1988; 33: 705–710.
  184. Frier BM, Saunders JH, Wormsley KG, et al. Exocrine pancreatic function in juvenile-onset diabetes mellitus. *Gut* 1976; 17: 685–691.
  185. Gröger G and Layer P. Exocrine pancreatic function in diabetes mellitus. *Eur J Gastroenterol Hepatol* 1995; 7: 740–746.
  186. Harano Y, Kim CI, Kang M, et al. External pancreatic dysfunction associated with diabetes mellitus. *J Lab Clin Med* 1978; 91: 780–790.
  187. Lankisch PG, Manthey G, Otto J, et al. Exocrine pancreatic function in insulin-dependent diabetes mellitus. *Digestion* 1982; 25: 211–216.
  188. Vacca JB, Henke WJ and Knight WA. The exocrine pancreas in diabetes mellitus. *Ann Intern Med* 1964; 61: 242–247.
  189. Löhr M and Klöppel G. The pancreas in chronic type 1 diabetes: Beta cell content, exocrine atrophy and angiopathy. *Verh Dtsch Ges Pathol* 1987; 71: 114–119.
  190. Icks A, Haastert B, Giani G, et al. Low fecal elastase-1 in type I diabetes mellitus. *Z Gastroenterol* 2001; 39: 823–830.
  191. Rathmann W, Haastert B, Icks A, et al. Low faecal elastase 1 concentrations in type 2 diabetes mellitus. *Scand J Gastroenterol* 2001; 36: 1056–1061.
  192. Hardt PD, Hauenschild A, Nalop J, et al. High prevalence of exocrine pancreatic insufficiency in diabetes mellitus. A multicenter study screening fecal elastase 1 concentrations in 1,021 diabetic patients. *Pancreatol* 2003; 3: 395–402.
  193. Saito A, Noguchi Y, Yoshikawa T, et al. Gastrectomized patients are in a state of chronic protein malnutrition analyses of 23 amino acids. *Hepatogastroenterology* 2001; 48: 585–589.
  194. Dominguez-Munoz JE. Pancreatic enzyme replacement therapy: Exocrine pancreatic insufficiency after gastrointestinal surgery. *HPB (Oxford)* 2009; 11: S3–S6.
  195. Friess H, Bohm J, Muller MW, et al. Maldigestion after total gastrectomy is associated with pancreatic insufficiency. *Am J Gastroenterol* 1996; 91: 341–347.
  196. Gullo L, Costa PL, Ventrucci M, et al. Exocrine pancreatic function after total gastrectomy. *Scand J Gastroenterol* 1979; 14: 401–407.
  197. Keller J, Franke A, Storr M, et al. [Clinically relevant breath tests in gastroenterological diagnostics—recommendations of the German Society for Neurogastroenterology and Motility as well as the German Society for Digestive and Metabolic Diseases]. *Z Gastroenterol* 2005; 43: 1071–1090.
  198. Keller J, Aghdassi AA, Lerch MM, et al. Tests of pancreatic exocrine function – clinical significance in pancreatic and non-pancreatic disorders. *Best Pract Res Clin Gastroenterol* 2009; 23: 425–439.
  199. Price DA, Schmid ML, Ong EL, et al. Pancreatic exocrine insufficiency in HIV-positive patients. *HIV Med* 2005; 6: 33–36.
  200. Leeds JS, Hopper AD, Sidhu R, et al. Some patients with irritable bowel syndrome may have exocrine pancreatic insufficiency. *Clin Gastroenterol Hepatol* 2010; 8: 433–438.
  201. Brelian D and Tenner S. Diarrhoea due to pancreatic diseases. *Best Pract Res Clin Gastroenterol* 2012; 26: 623–631.
  202. Gullo L, Pezzilli R, Ancona D, et al. Effect of octreotide, a long-acting somatostatin analogue, on plasma amino acid uptake by the pancreas. *Pancreas* 1991; 6: 668–672.
  203. Creutzfeldt W, Lembcke B, Fölsch UR, et al. Effect of somatostatin analogue (SMS 201-995, Sandostatin) on pancreatic secretion in humans. *Am J Med* 1987; 82: 49–54.
  204. Saif MW, Larson H, Kaley K, et al. Chronic octreotide therapy can induce pancreatic insufficiency: A common but under-recognized adverse effect. *Expert Opin Drug Saf* 2010; 9: 867–873.
  205. Layer P, Yamamoto H, Kalthoff L, et al. The different courses of early- and late-onset idiopathic and alcoholic chronic pancreatitis. *Gastroenterology* 1994; 107: 1481–1487.
  206. Lankisch PG, Seidensticker F, Otto J, et al. Secretin-pancreozymin test (SPT) and endoscopic retrograde cholangiopancreatography (ERCP): Both are necessary for diagnosing or excluding chronic pancreatitis. *Pancreas* 1996; 12: 149–152.
  207. Chowdhury R, Bhutani MS, Mishra G, et al. Comparative analysis of direct pancreatic function testing versus morphological assessment by endoscopic ultrasonography for the evaluation of chronic unexplained abdominal pain of presumed pancreatic origin. *Pancreas* 2005; 31: 63–68.
  208. Stevens T, Dumot JA, Zuccaro G, et al. Evaluation of duct-cell and acinar-cell function and endosonographic abnormalities in patients with suspected chronic pancreatitis. *Clin Gastroenterol Hepatol* 2009; 7: 114–119.

209. Conwell DL, Zuccaro G, Purich E, et al. Comparison of endoscopic ultrasound chronic pancreatitis criteria to the endoscopic secretin-stimulated pancreatic function test. *Dig Dis Sci* 2007; 52: 1206–1210.
210. Albashir S, Bronner MP, Parsi MA, et al. Endoscopic ultrasound, secretin endoscopic pancreatic function test, and histology: Correlation in chronic pancreatitis. *Am J Gastroenterol* 2010; 105: 2498–2503.
211. Madzak A, Olesen SS, Wathle GK, et al. Secretin stimulated MRI assessment of the benign pancreatic disorders systematic review and proposal for a standardized protocol. *Pancreas* 2016; 45: 1092–1103.
212. Gillams A, Pereira S, Webster G, et al. Correlation of MRCP quantification (MRCPQ) with conventional non-invasive pancreatic exocrine function tests. *Abdom Imaging* 2008; 33: 469–473.
213. Manfredi R, Perandini S, Mantovani W, et al. Quantitative MRCP assessment of pancreatic exocrine reserve and its correlation with faecal elastase-1 in patients with chronic pancreatitis. *Radiol Med* 2012; 117: 282–292.
214. Bilgin M, Balci NC, Momtahan AJ, et al. MRI and MRCP findings of the pancreas in patients with diabetes mellitus: Compared analysis with pancreatic exocrine function determined by fecal elastase 1. *J Clin Gastroenterol* 2009; 43: 165–170.
215. Czako L, Endes J, Takacs T, et al. Evaluation of pancreatic exocrine function by secretin-enhanced magnetic resonance cholangiopancreatography. *Pancreas* 2001; 23: 323–328.
216. Calculli L, Pezzilli R, Fiscaletti M, et al. Exocrine pancreatic function assessed by secretin cholangio-Wirsung magnetic resonance imaging. *HBP Dis Int* 2008; 7: 192–195.
217. Heijerman HG, Tjon a Tham RT, Bakker W, et al. Quantitative assessment of pancreatic function by magnetic resonance in cystic fibrosis. *Neth J Med* 1993; 43: 59–63.
218. Dominguez Munoz JE, Hieronymus C, Sauerbruch T, et al. Faecal elastase test: Evaluation of a new noninvasive pancreatic function test. *Am J Gastroenterol* 1995; 90: 1834–1837.
219. Löser C, Möllgaard A and Fölsch UR. Faecal elastase 1: A novel, highly sensitive, and specific tubeless pancreatic function test. *Gut* 1996; 39: 580–586.
220. Symersky T, van der Zon A, Biemond I, et al. Faecal elastase-I: Helpful in analysing steatorrhoea? *Neth J Med* 2004; 62: 286–289.
221. Fischer B, Hoh S, Wehler M, et al. Faecal elastase-1: Lyophilization of stool samples prevents false low results in diarrhoea. *Scand J Gastroenterol* 2001; 36: 771–774.
222. Hardt PD, Hauenschild A, Nalop J, et al. The commercially available ELISA for pancreatic elastase 1 based on polyclonal antibodies does measure an as yet unknown antigen different from purified elastase 1. Binding studies and clinical use in patients with exocrine pancreatic insufficiency. *Z Gastroenterol* 2003; 41: 903–906.
223. Dominguez-Munoz JE, Iglesias-Garcia J, Vilarino-Insua M, et al. 13C-Mixed triglyceride breath test to assess oral enzyme substitution therapy in patients with chronic pancreatitis. *Clin Gastroenterol Hepatol* 2007; 5: 484–488.
224. Keller J, Layer P, Brückel S, et al. 13C-Mixed triglyceride breath test for evaluation of pancreatic exocrine function in diabetes mellitus. *Pancreas* 2014; 43: 842–848.
225. Domínguez-Muñoz JE, Nieto L, Vilariño M, et al. Development and diagnostic accuracy of a breath test for pancreatic exocrine insufficiency in chronic pancreatitis. *Pancreas* 2016; 45: 241–247.
226. Brückel S, Keller J, Jahr C, et al. A modified 13C-mixed triglyceride breath test detects moderate pancreatic exocrine insufficiency. *Pancreas* 2013; 40: 1201–1205.
227. Keller J, Meier V, Wolfram KU, et al. Sensitivity and specificity of an abbreviated (13)C-mixed triglyceride breath test for measurement of pancreatic exocrine function. *United European Gastroenterol J* 2014; 2: 288–294.
228. Schneider AR, Hammerstingl R, Heller M, et al. Does secretin-stimulated MRCP predict exocrine pancreatic insufficiency? A comparison with noninvasive exocrine pancreatic function tests. *J Clin Gastroenterol* 2006; 40: 851–855.
229. Bilgin M, Bilgin S, Balci NC, et al. Magnetic resonance imaging and magnetic resonance cholangiopancreatography findings compared with fecal elastase 1 measurement for the diagnosis of chronic pancreatitis. *Pancreas* 2008; 36: e33–e39.
230. Siegmund E, Löhr JM and Schuff-Werner P. [The diagnostic validity of non-invasive pancreatic function tests—a meta-analysis]. *Z Gastroenterol* 2004; 42: 1117–1128.
231. Catalano MF, Lahoti S, Geenen JE, et al. Prospective evaluation of endoscopic ultrasonography, endoscopic retrograde pancreatography, and secretin test in the diagnosis of chronic pancreatitis. *Gastrointest Endosc* 1998; 48: 11–17.
232. Sarles H, Adler G, Dani R, et al. The pancreatitis classification of Marseilles-Rome 1988. *Scand J Gastroenterol* 1989; 24: 641–642.
233. Stevens T, Lopez R, Adler DG, et al. Multicenter comparison of the interobserver agreement of standard EUS scoring and Rosemont classification scoring for diagnosis of chronic pancreatitis. *Gastrointest Endosc* 2010; 71: 519–526.
234. Ammann RW. A clinically based classification system for alcoholic chronic pancreatitis: Summary of an international workshop on chronic pancreatitis. *Pancreas* 1997; 14: 215–221.
235. Conwell DL, Lee LS, Yadav D, et al. American Pancreatic Association Practice Guidelines in Chronic Pancreatitis: Evidence-based report on diagnostic guidelines. *Pancreas* 2014; 43: 1143–1162.
236. Bozkurt T, Braun U, Leferink S, et al. Comparison of pancreatic morphology and exocrine functional impairment in patients with chronic pancreatitis. *Gut* 1994; 35: 1132–1116.
237. Malfrather P, Büchler M, Stanescu A, et al. Exocrine pancreatic function in correlation to ductal and

- parenchymal morphology in chronic pancreatitis. *Hepatogastroenterology* 1986; 33: 110–114.
238. Lankisch PG, Droge M, Hofses S, et al. Steatorrhea: You cannot trust your eyes when it comes to diagnosis. *Lancet* 1996; 347: 1620–1621.
239. Dumasy V, Delhaye M, Cotton F, et al. Fat malabsorption screening in chronic pancreatitis. *Am J Gastroenterol* 2004; 99: 1350–1354.
240. Lankisch PG, Schmidt I, Konig H, et al. Faecal elastase 1: Not helpful in diagnosing chronic pancreatitis associated with mild to moderate exocrine pancreatic insufficiency. *Gut* 1998; 42: 551–554.
241. Naruse S, Ishiguro H, Ko SBH, et al. Fecal pancreatic elastase: A reproducible marker for severe exocrine pancreatic insufficiency. *J Gastroenterol* 2006; 41: 901–908.
242. Mann ST, Stracke H, Lange U, et al. Vitamin D3 in patients with various grades of chronic pancreatitis, according to morphological and functional criteria of the pancreas. *Dig Dis Sci* 2003; 48: 533–538.
243. Lindkvist B, Phillips ME and Dominguez-Munoz JE. Clinical, anthropometric and laboratory nutritional markers of pancreatic exocrine insufficiency: Prevalence and diagnostic use. *Pancreatology* 2015; 15: 589–397.
244. Lindkvist B, Dominguez-Munoz JE, Luaces-Regueira M, et al. Serum nutritional markers for prediction of pancreatic exocrine insufficiency in chronic pancreatitis. *Pancreatology* 2012; 12: 305–310.
245. Kolodziejczyk E, Wejnarska K, Dadalski M, et al. The nutritional status and factors contributing to malnutrition in children with chronic pancreatitis. *Pancreatology* 2014; 14: 275–279.
246. Cahen DL, van Berkel AM, Oskam D, et al. Long-term results of endoscopic drainage of common bile duct strictures in chronic pancreatitis. *Eur J Gastroenterol Hepatol* 2005; 17: 103–108.
247. Cahen DL, Gouma DJ, Nio Y, et al. Endoscopic versus surgical drainage of the pancreatic duct in chronic pancreatitis. *N Eng J Med* 2007; 356: 676–684.
248. Cahen DL, Gouma DJ, Laramée P, et al. Long-term outcomes of endoscopic vs surgical drainage of the pancreatic duct in patients with chronic pancreatitis. *Gastroenterology* 2011; 141: 1690–1695.
249. Dite P, Ruzicka M, Zboril V, et al. A prospective, randomized trial comparing endoscopic and surgical therapy for chronic pancreatitis. *Endoscopy* 2003; 35: 553–558.
250. Nealon WH and Thompson JC. Progressive loss of pancreatic function in chronic pancreatitis is delayed by main pancreatic duct decompression. A longitudinal prospective analysis of the modified puestow procedure. *Ann Surg* 1993; 217: 458–466; discussion 466–468.
251. Ahmed Ali U, Nieuwenhuijs VB, van Eijck CH, et al. Clinical outcome in relation to timing of surgery in chronic pancreatitis: A nomogram to predict pain relief. *Arch Surg* 2012; 147: 925–932.
252. Yang CJ, Bliss LA, Schapira EF, et al. Systematic review of early surgery for chronic pancreatitis: Impact on pain, pancreatic function, and re-intervention. *J Gastrointest Surg* 2014; 18: 1863–1869.
253. Riediger H, Adam U, Fischer E, et al. Long-term outcome after resection for chronic pancreatitis in 224 patients. *J Gastrointest Surg* 2007; 11: 949–959; discussion 959–960.
254. Diener MK, Rahbari NN, Fischer L, et al. Duodenum-preserving pancreatic head resection versus pancreatoduodenectomy for surgical treatment of chronic pancreatitis: A systematic review and meta-analysis. *Ann Surg* 2008; 247: 950–961.
255. Farkas G, Leindler L, Daroczi M, et al. Prospective randomised comparison of organ-preserving pancreatic head resection with pylorus-preserving pancreaticoduodenectomy. *Langenbecks Arch Surg* 2006; 391: 338–342.
256. Izbicki JR, Bloechle C, Broering DC, et al. Extended drainage versus resection in surgery for chronic pancreatitis: A prospective randomized trial comparing the longitudinal pancreaticojejunostomy combined with local pancreatic head excision with the pylorus-preserving pancreatoduodenectomy. *Ann Surg* 1998; 228: 771–779.
257. Büchler MW, Friess H, Müller MW, et al. Randomized trial of duodenum-preserving pancreatic head resection versus pylorus-preserving Whipple in chronic pancreatitis. *Am J Surg* 1995; 169: 65–69; discussion 69–70.
258. Klempa I, Spatny M, Menzel J, et al. [Pancreatic function and quality of life after resection of the head of the pancreas in chronic pancreatitis. A prospective, randomized comparative study after duodenum preserving resection of the head of the pancreas versus Whipple's operation]. *Chirurg* 1995; 66: 350–359.
259. Müller MW, Friess H, Martin DJ, et al. Long-term follow-up of a randomized clinical trial comparing Beger with pylorus-preserving Whipple procedure for chronic pancreatitis. *Br J Surg* 2008; 95: 350–356.
260. Strate T, Bachmann K, Busch P, et al. Resection vs drainage in treatment of chronic pancreatitis: Long-term results of a randomized trial. *Gastroenterology* 2008; 134: 1406–1411.
261. Bloechle C, Izbicki JR, Knoefel WT, et al. Quality of life in chronic pancreatitis—results after duodenum-preserving resection of the head of the pancreas. *Pancreas* 1995; 11: 77–85.
262. Keck T, Adam U, Makowiec F, et al. Short- and long-term results of duodenum preservation versus resection for the management of chronic pancreatitis: A prospective, randomized study. *Surgery* 2012; 152: S95–S102.
263. Bachmann K, Tomkoetter L, Erbes J, et al. Beger and Frey procedures for treatment of chronic pancreatitis: Comparison of outcomes at 16-year follow-up. *J Am Coll Surg* 2014; 219: 208–216.
264. Koninger J, Seiler CM, Sauerland S, et al. Duodenum-preserving pancreatic head resection—a randomized controlled trial comparing the original Beger procedure with the Berne modification (ISRCTN No. 50638764). *Surgery* 2008; 143: 490–498.
265. Warshaw AL, Popp JW Jr and Schapiro RH. Long-term patency, pancreatic function, and pain relief after lateral pancreaticojejunostomy for chronic pancreatitis. *Gastroenterology* 1980; 79: 289–293.
266. Adam U, Makowiec F, Riediger H, et al. Pancreatic head resection for chronic pancreatitis in patients with

- extrahepatic generalized portal hypertension. *Surgery* 2004; 135: 411–418.
267. Negi S, Singh A and Chaudhary A. Pain relief after Frey's procedure for chronic pancreatitis. *Br J Surg* 2010; 97: 1087–1095.
268. Izbicki JR, Bloechle C, Knoefel WT, et al. Duodenum-preserving resection of the head of the pancreas in chronic pancreatitis. A prospective, randomized trial. *Ann Surg* 1995; 221: 350–358.
269. Bachmann K, Tomkoetter L, Kutup A, et al. Is the Whipple procedure harmful for long-term outcome in treatment of chronic pancreatitis? 15-Years follow-up comparing the outcome after pylorus-preserving pancreatoduodenectomy and Frey procedure in chronic pancreatitis. *Ann Surg* 2013; 258: 815–820; discussion 820–821.
270. Ahmed Ali U, Issa Y, Bruno MJ, et al. Early surgery versus optimal current step-up practice for chronic pancreatitis (ESCAPE): Design and rationale of a randomized trial. *BMC Gastroenterol* 2013; 13: 49.
271. Frey CF and Amikura K. Local resection of the head of the pancreas combined with longitudinal pancreaticojejunostomy in the management of patients with chronic pancreatitis. *Ann Surg* 1994; 220: 492–504; discussion 507.
272. Schlosser W, Schwarz A and Beger HG. Surgical treatment of chronic pancreatitis with pancreatic main duct dilatation: Long term results after head resection and duct drainage. *HPB (Oxford)* 2005; 7: 114–119.
273. Terrace JD, Paterson HM, Garden OJ, et al. Results of decompression surgery for pain in chronic pancreatitis. *HPB (Oxford)* 2007; 9: 308–311.
274. Izbicki JR and Bloechle C. [Drainage operation as therapeutic principle of surgical organ saving treatment of chronic pancreatitis]. *Chirurg* 1997; 68: 865–873.
275. Bellin MD, Freeman ML, Gelrud A, et al. Total pancreatectomy and islet autotransplantation in chronic pancreatitis: Recommendations from PancreasFest. *Pancreatol* 2014; 14: 27–35.
276. Keus E, van Laarhoven CJ, Eddes EH, et al. Size of the pancreatic head as a prognostic factor for the outcome of Beger's procedure for painful chronic pancreatitis. *Br J Surg* 2003; 90: 320–324.
277. Delcore R, Rodriguez FJ, Thomas JH, et al. The role of pancreatojejunostomy in patients without dilated pancreatic ducts. *Am J Surg* 1994; 168: 598–601; discussion 602.
278. Paye F, Nicoluzzi E, Calicis B, et al. [Role of remaining ductal cephalad obstruction on the results of lateral pancreatojejunostomy in chronic pancreatitis]. *Gastroenterol Clin Biol* 2001; 25: 755–760.
279. Nathan H, Cameron JL, Choti MA, et al. The volume-outcomes effect in hepato-pancreato-biliary surgery: Hospital versus surgeon contributions and specificity of the relationship. *J Am Coll Surg* 2009; 208: 528–538.
280. Birkmeyer JD, Stukel TA, Siewers AE, et al. Surgeon volume and operative mortality in the United States. *N Engl J Med* 2003; 349: 2117–2127.
281. Eppsteiner RW, Csikesz NG, McPhee JT, et al. Surgeon volume impacts hospital mortality for pancreatic resection. *Ann Surg* 2009; 249: 635–640.
282. Schmidt CM, Turrini O, Parikh P, et al. Effect of hospital volume, surgeon experience, and surgeon volume on patient outcomes after pancreaticoduodenectomy: A single-institution experience. *Arch Surg* 2010; 145: 634–640.
283. Healy MA, Krell RW, Abdelsattar ZM, et al. Pancreatic resection results in a statewide surgical collaborative. *Ann Surg Oncol* 2015; 22: 2468–2474.
284. Permert J and Löhr M. Organisation of a modern chain-of-care in pancreatology. In: Löhr M and Andren-Sandberg Å (eds) *Pancreatitis – diagnosis and therapy*. Bremen: Uni-Med, 2011, pp. 245–247.
285. Jani B, Rzouq F, Saligram S, et al. Groove pancreatitis: A rare form of chronic pancreatitis. *N Am J Med Sci* 2015; 7: 529–532.
286. DeSouza K and Nodit L. Groove pancreatitis: A brief review of a diagnostic challenge. *Arch Pathol Lab Med* 2015; 139: 417–421.
287. Lekkerkerker SJ, Nio CY, Issa Y, et al. Clinical outcomes and prevalence of cancer in patients with possible groove pancreatitis. *J Gastroenterol Hepatol* 2016; 31: 1895–1900.
288. Dominguez-Munoz JE and Iglesias-Garcia J. Oral pancreatic enzyme substitution therapy in chronic pancreatitis: Is clinical response an appropriate marker for evaluation of therapeutic efficacy? *J Pancreas* 2010; 11: 158–162.
289. Meier R, Ockenga J, Pertkiewicz M, et al. ESPEN guidelines on enteral nutrition: Pancreas. *Clin Nutr* 2006; 25: 275–284.
290. Regan PT, Malagelada JR, DiMagno EP, et al. Comparative effects of antacids, cimetidine and enteric coating on the therapeutic response to oral enzymes in severe pancreatic insufficiency. *N Engl J Med* 1977; 297: 854–858.
291. Layer P, von der Ohe MR, Holst JJ, et al. Altered postprandial motility in chronic pancreatitis: Role of malabsorption. *Gastroenterology* 1997; 112: 1624–1634.
292. Wooldridge JL, Heubi JE, Amaro-Galvez R, et al. EUR-1008 pancreatic enzyme replacement is safe and effective in patients with cystic fibrosis and pancreatic insufficiency. *J Cyst Fibros* 2009; 8: 405–417.
293. Gan KH, Geus WP, Bakker W, et al. In vitro dissolution profiles of enteric-coated microsphere/microtablet pancreatin preparations at different pH values. *Aliment Pharmacol Ther* 1996; 10: 771–775.
294. Löhr JM, Hummel FM, Pirlis KT, et al. Properties of different pancreatin preparations used in pancreatic exocrine insufficiency. *Eur J Gastroenterol Hepatol* 2009; 21: 1024–1031.
295. D'Haese JG, Ceyhan GO, Demir IE, et al. Pancreatic enzyme replacement therapy in patients with exocrine pancreatic insufficiency due to chronic pancreatitis: A 1-year disease management study on symptom control and quality of life. *Pancreas* 2014; 43: 834–841.
296. Ramesh H, Reddy N, Bhatia S, et al. A 51-week, open-label clinical trial in India to assess the efficacy and

- safety of pancreatin 40000 enteric-coated minimicrospheres in patients with pancreatic exocrine insufficiency due to chronic pancreatitis. *Pancreatol* 2013; 13: 133–139.
297. Thorat V, Reddy N, Bhatia S, et al. Randomised clinical trial: The efficacy and safety of pancreatin enteric-coated minimicrospheres (Creon 40000 MMS) in patients with pancreatic exocrine insufficiency due to chronic pancreatitis—a double-blind, placebo-controlled study. *Aliment Pharmacol Ther* 2012; 36: 426–436.
298. Whitcomb DC, Lehman GA, Vasileva G, et al. Pancrelipase delayed-release capsules (CREON) for exocrine pancreatic insufficiency due to chronic pancreatitis or pancreatic surgery: A double-blind randomized trial. *Am J Gastroenterol* 2010; 105: 2276–2286.
299. Dutta SK, Rubin J and Harvey J. Comparative evaluation of the therapeutic efficacy of a pH-sensitive enteric coated pancreatic enzyme preparation with conventional pancreatic enzyme therapy in the treatment of exocrine pancreatic insufficiency. *Gastroenterology* 1983; 84: 476–482.
300. Somaraju UR and Solis-Moya A. Pancreatic enzyme replacement therapy for people with cystic fibrosis. *Cochrane Database Syst Rev* 2014; 10: CD008227.
301. Bruno MJ, Borm JJ, Hoek FJ, et al. Gastric transit and pharmacodynamics of a two-millimeter enteric-coated pancreatin microsphere preparation in patients with chronic pancreatitis. *Dig Dis Sci* 1998; 43: 203–213.
302. DiMagno EP, Malagelada JR, Go VL, et al. Fate of orally ingested enzymes in pancreatic insufficiency. Comparison of two dosage schedules. *N Engl J Med* 1977; 296: 1318–1322.
303. Dominguez-Munoz JE, Iglesias-Garcia J, Iglesias-Rey M, et al. Effect of the administration schedule on the therapeutic efficacy of oral pancreatic enzyme supplements in patients with exocrine pancreatic insufficiency: A randomized, three-way crossover study. *Aliment Pharmacol Ther* 2005; 21: 993–1000.
304. Sweetman S (ed). *Martindale: The complete drug reference*. 30th ed. London: Pharmaceutical Press, 1999.
305. O'Keefe SJ, Cariem AK and Levy M. The exacerbation of pancreatic endocrine dysfunction by potent pancreatic exocrine supplements in patients with chronic pancreatitis. *J Clin Gastroenterol* 2001; 32: 319–323.
306. Safdi M, Bekal PK, Martin S, et al. The effects of oral pancreatic enzymes (Creon 10 capsule) on steatorrhea: A multicenter, placebo-controlled, parallel group trial in subjects with chronic pancreatitis. *Pancreas* 2006; 33: 156–162.
307. Halm U, Loser C, Löhr M, et al. A double-blind, randomized, multicentre, crossover study to prove equivalence of pancreatin minimicrospheres versus microspheres in exocrine pancreatic insufficiency. *Aliment Pharmacol Ther* 1999; 13: 951–957.
308. Opekun AR Jr, Sutton FM Jr and Graham DY. Lack of dose-response with Pancrease MT for the treatment of exocrine pancreatic insufficiency in adults. *Aliment Pharmacol Ther* 1997; 11: 981–986.
309. Vecht J, Symersky T, Lamers CB, et al. Efficacy of lower than standard doses of pancreatic enzyme supplementation therapy during acid inhibition in patients with pancreatic exocrine insufficiency. *J Clin Gastroenterol* 2006; 40: 721–725.
310. Toskes PP, Secci A, Thieroff-Ekerdt R, et al. Efficacy of a novel pancreatic enzyme product, EUR-1008 (Zenpep), in patients with exocrine pancreatic insufficiency due to chronic pancreatitis. *Pancreas* 2011; 40: 376–382.
311. Czako L, Takacs T, Hegyi P, et al. Quality of life assessment after pancreatic enzyme replacement therapy in chronic pancreatitis. *Can J Gastroenterol* 2003; 17: 597–603.
312. Ritz MA, Fraser RJ, Di Matteo AC, et al. Evaluation of the 13C-triolein breath test for fat malabsorption in adult patients with cystic fibrosis. *J Gastroenterol Hepatol* 2004; 19: 448–453.
313. Dominguez-Munoz JE, Iglesias-Garcia J, Iglesias-Rey M, et al. Optimising the therapy of exocrine pancreatic insufficiency by the association of a proton pump inhibitor to enteric coated pancreatic extracts. *Gut* 2006; 55: 1056–1057.
314. Bruno MJ, Rauws EA, Hoek FJ, et al. Comparative effects of adjuvant cimetidine and omeprazole during pancreatic enzyme replacement therapy. *Dig Dis Sci* 1994; 39: 988–992.
315. Casellas F, Guarner L, Vaquero E, et al. Hydrogen breath test with glucose in exocrine pancreatic insufficiency. *Pancreas* 1998; 16: 481–486.
316. Carroccio A, Pardo F, Montalto G, et al. Use of famotidine in severe exocrine pancreatic insufficiency with persistent maldigestion on enzymatic replacement therapy. A long-term study in cystic fibrosis. *Dig Dis Sci* 1992; 37: 1441–1446.
317. Durie PR, Bell L, Linton W, et al. Effect of cimetidine and sodium bicarbonate on pancreatic replacement therapy in cystic fibrosis. *Gut* 1980; 21: 778–786.
318. Lankisch PG, Lembcke B, Goke B, et al. Therapy of pancreatogenic steatorrhea: Does acid protection of pancreatic enzymes offer any advantage? *Z Gastroenterol* 1986; 24: 753–757.
319. Sander-Struckmeier S, Beckmann K, Janssen-van Solingen G, et al. Retrospective analysis to investigate the effect of concomitant use of gastric acid-suppressing drugs on the efficacy and safety of pancrelipase/pancreatin (CREON(R)) in patients with pancreatic exocrine insufficiency. *Pancreas* 2013; 42: 983–989.
320. Delhaye M, Vandermeeren A, Baize M, et al. Extracorporeal shock-wave lithotripsy of pancreatic calculi. *Gastroenterology* 1992; 102: 610–620.
321. Tadenuma H, Ishihara T, Yamaguchi T, et al. Long-term results of extracorporeal shockwave lithotripsy and endoscopic therapy for pancreatic stones. *Clin Gastroenterol Hepatol* 2005; 3: 1128–1135.
322. Tandan M, Reddy DN, Talukdar R, et al. Long-term clinical outcomes of extracorporeal shockwave lithotripsy in painful chronic calcific pancreatitis. *Gastrointest Endosc* 2013; 78: 726–733.
323. Varadarajulu S, Bang JY, Sutton BS, et al. Equal efficacy of endoscopic and surgical cystogastrostomy for

- pancreatic pseudocyst drainage in a randomized trial. *Gastroenterology* 2013; 145: 583–90.
324. Rosso E, Alexakis N, Ghaneh P, et al. Pancreatic pseudocyst in chronic pancreatitis: Endoscopic and surgical treatment. *Dig Surg* 2003; 20: 397–406.
325. Dumonceau J-M, Costamagna G, Tringali A, et al. Treatment for painful calcified chronic pancreatitis: Extracorporeal shock wave lithotripsy versus endoscopic treatment: A randomised controlled trial. *Gut* 2007; 56: 545–552.
326. Dumonceau JM, Delhaye M and Cremer M. Extracorporeal shock-wave lithotripsy for gallstone ileus. *Gastrointest Endosc* 1996; 44: 759.
327. Farnbacher MJ, Schoen C, Rabenstein T, et al. Pancreatic duct stones in chronic pancreatitis: Criteria for treatment intensity and success. *Gastrointest Endosc* 2002; 56: 501–506.
328. Delhaye M, Arvanitakis M, Verset G, et al. Long-term clinical outcome after endoscopic pancreatic ductal drainage for patients with painful chronic pancreatitis. *Clin Gastroenterol Hepatol* 2004; 2: 1096–1106.
329. Guda NM, Partington S and Freeman ML. Extracorporeal shock wave lithotripsy in the management of chronic calcific pancreatitis: A meta-analysis. *J Pancreas* 2005; 6: 6–12.
330. Nguyen-Tang T and Dumonceau J-M. Endoscopic treatment in chronic pancreatitis, timing, duration and type of intervention. *Best Pract Res Clin Gastroenterol* 2010; 24: 281–298.
331. Attwell AR, Brauer BC, Chen YK, et al. Endoscopic retrograde cholangiopancreatography with per oral pancreatoscopy for calcific chronic pancreatitis using endoscope and catheter-based pancreatoscopes: A 10-year single-center experience. *Pancreas* 2014; 43: 268–274.
332. Thomas M, Howell DA, Carr-Locke D, et al. Mechanical lithotripsy of pancreatic and biliary stones: Complications and available treatment options collected from expert centers. *Am J Gastroenterol* 2007; 102: 1896–1902.
333. Adamek HE, Jakobs R, Buttmann A, et al. Long term follow up of patients with chronic pancreatitis and pancreatic stones treated with extracorporeal shock wave lithotripsy. *Gut* 1999; 45: 402–405.
334. Brand B, Kahl M, Sidhu S, et al. Prospective evaluation of morphology, function, and quality of life after extracorporeal shockwave lithotripsy and endoscopic treatment of chronic calcific pancreatitis. *Am J Gastroenterol* 2000; 95: 3428–3438.
335. Inui K, Tazuma S, Yamaguchi T, et al. Treatment of pancreatic stones with extracorporeal shock wave lithotripsy: Results of a multicenter survey. *Pancreas* 2005; 30: 26–30.
336. Kozarek RA, Brandabur JJ, Ball TJ, et al. Clinical outcomes in patients who undergo extracorporeal shock wave lithotripsy for chronic calcific pancreatitis. *Gastrointest Endosc* 2002; 56: 496–500.
337. Tandan M, Reddy DN, Santosh D, et al. Extracorporeal shock wave lithotripsy and endotherapy for pancreatic calculi—a large single center experience. *Indian J Gastroenterol* 2010; 29: 143–148.
338. Ohyama H, Mikata R, Ishihara T, et al. Efficacy of stone density on noncontrast computed tomography in predicting the outcome of extracorporeal shock wave lithotripsy for patients with pancreatic stones. *Pancreas* 2015; 44: 422–428.
339. Choi EK, McHenry L, Watkins JL, et al. Use of intravenous secretin during extracorporeal shock wave lithotripsy to facilitate endoscopic clearance of pancreatic duct stones. *Pancreatol* 2012; 12: 272–275.
340. Merrill JT, Mullady DK, Early DS, et al. Timing of endoscopy after extracorporeal shock wave lithotripsy for chronic pancreatitis. *Pancreas* 2011; 40: 1087–1090.
341. Ohara H, Hoshino M, Hayakawa T, et al. Single application extracorporeal shock wave lithotripsy is the first choice for patients with pancreatic duct stones. *Am J Gastroenterol* 1996; 91: 1388–1394.
342. Li B-R, Liao Z, Du T-T, et al. Risk factors for complications of pancreatic extracorporeal shock wave lithotripsy. *Endoscopy* 2014; 46: 1092–1100.
343. Seven G, Schreiner MA, Ross AS, et al. Long-term outcomes associated with pancreatic extracorporeal shock wave lithotripsy for chronic calcific pancreatitis. *Gastrointest Endosc* 2012; 75: 997–1004.
344. Tringali A, Boskoski I and Costamagna G. The role of endoscopy in the therapy of chronic pancreatitis. *Best Pract Res Clin Gastroenterol* 2008; 22: 145–165.
345. Dumonceau JM, Delhaye M, Tringali A, et al. Endoscopic treatment of chronic pancreatitis: European Society of Gastrointestinal Endoscopy (ESGE) clinical guideline. *Endoscopy* 2012; 44: 784–800.
346. Sarles H, Sarles JC, Camatte R, et al. Observations on 205 confirmed cases of acute pancreatitis, recurring pancreatitis, and chronic pancreatitis. *Gut* 1965; 6: 545–559.
347. Nguyen-Tang T and Dumonceau J-M. Endoscopic treatment in chronic pancreatitis, timing, duration and type of intervention. *Best Pract Res Clin Gastroenterol* 2010; 24: 281–298.
348. Ponchon T, Bory RM, Hedelius F, et al. Endoscopic stenting for pain relief in chronic pancreatitis: Results of a standardized protocol. *Gastrointestinal Endosc* 1995; 42: 452–456.
349. Binmoeller KF, Jue P, Seifert H, et al. Endoscopic pancreatic stent drainage in chronic pancreatitis and a dominant stricture: Long-term results. *Endoscopy* 1995; 27: 638–644.
350. Eleftherladis N, Dinu F, Delhaye M, et al. Long-term outcome after pancreatic stenting in severe chronic pancreatitis. *Endoscopy* 2005; 37: 223–230.
351. Smits ME, Badiga SM, Rauws EA, et al. Long-term results of pancreatic stents in chronic pancreatitis. *Gastrointest Endosc* 1995; 42: 461–467.
352. Vitale GC, Cothron K, Vitale EA, et al. Role of pancreatic duct stenting in the treatment of chronic pancreatitis. *Surg Endosc* 2004; 18: 1431–1434.
353. Costamagna G, Bulajic M, Tringali A, et al. Multiple stenting of refractory pancreatic duct strictures in severe chronic pancreatitis: Long-term results. *Endoscopy* 2006; 38: 254–259.
354. Farnbacher MJ, Radespiel-Tröger M, König MD, et al. Pancreatic endoprotheses in chronic pancreatitis:

- Criteria to predict stent occlusion. *Gastrointest Endosc* 2006; 63: 60–66.
355. Sauer BG, Gurka MJ, Ellen K, et al. Effect of pancreatic duct stent diameter on hospitalization in chronic pancreatitis: Does size matter? *Pancreas* 2009; 38: 728–731.
356. Ishihara T, Yamaguchi T, Seza K, et al. Efficacy of s-type stents for the treatment of the main pancreatic duct stricture in patients with chronic pancreatitis. *Scand J Gastroenterol* 2006; 41: 744–750.
357. Morgan DE, Smith JK, Hawkins K, et al. Endoscopic stent therapy in advanced chronic pancreatitis: Relationships between ductal changes, clinical response, and stent patency. *Am J Gastroenterol* 2003; 98: 821–826.
358. Ponchon T, Bory RM, Hedelius F, et al. Endoscopic stenting for pain relief in chronic pancreatitis: Results of a standardized protocol. *Gastrointest Endosc* 1995; 42: 452–456.
359. Costamagna G, Bulajic M, Tringali A, et al. Multiple stenting of refractory pancreatic duct strictures in severe chronic pancreatitis: Long-term results. *Endoscopy* 2006; 38: 254–259.
360. Binmoeller KF, Jue P, Seifert H, et al. Endoscopic pancreatic stent drainage in chronic pancreatitis and a dominant stricture: Long-term results. *Endoscopy* 1995; 27: 638–644.
361. Eleftheriadis N, Dinu F, Delhay M, et al. Long-term outcome after pancreatic stenting in severe chronic pancreatitis. *Endoscopy* 2005; 37: 223–230.
362. Smits ME, Badiga SM, Rauws EA, et al. Long-term results of pancreatic stents in chronic pancreatitis. *Gastrointestinal Endosc* 1995; 42: 461–467.
363. Giacino C, Grandval P and Laugier R. Fully covered self-expanding metal stents for refractory pancreatic duct strictures in chronic pancreatitis. *Endoscopy* 2012; 44: 874–877.
364. Eisendrath P and Devière J. Expandable metal stents for benign pancreatic duct obstruction. *Gastrointest Endosc Clin N Am* 1999; 9: 547–554.
365. Moon SH, Kim MH, Park DH, et al. Modified fully covered self-expandable metal stents with antimigration features for benign pancreatic-duct strictures in advanced chronic pancreatitis, with a focus on the safety profile and reducing migration. *Gastrointest Endosc* 2010; 72: 86–91.
366. Sauer B, Talreja J, Ellen K, et al. Temporary placement of a fully covered self-expandable metal stent in the pancreatic duct for management of symptomatic refractory chronic pancreatitis: Preliminary data (with videos). *Gastrointest Endosc* 2008; 68: 1173–1178.
367. Shen Y, Liu M, Chen M, et al. Covered metal stent or multiple plastic stents for refractory pancreatic ductal strictures in chronic pancreatitis: A systematic review. *Pancreatol* 2014; 14: 87–90.
368. Johanson JF, Schmalz MJ and Geenen JE. Incidence and risk factors for biliary and pancreatic stent migration. *Gastrointest Endosc* 1992; 38: 341–346.
369. Kawaguchi Y, Lin J-C, Kawashima Y, et al. Risk factors for migration, fracture, and dislocation of pancreatic stents. *Gastroenterol Res Pract* 2015; 2015: 365457.
370. Park DH, Kim MH, Moon SH, et al. Feasibility and safety of placement of a newly designed, fully covered self-expandable metal stent for refractory benign pancreatic ductal strictures: A pilot study (with video). *Gastrointest Endosc* 2008; 68: 1182–1191.
371. Afroudakis A and Kaplowitz N. Liver histopathology in chronic common bile duct stenosis due to chronic alcoholic pancreatitis. *Hepatology* 1981; 1: 65–72.
372. Frey CF, Suzuki M and Isaji S. Treatment of chronic pancreatitis complicated by obstruction of the common bile duct or duodenum. *World J Surg* 1990; 14: 59–69.
373. Warshaw AL, Schapiro RH, Ferrucci JT, et al. Persistent obstructive jaundice, cholangitis, and biliary cirrhosis due to common bile duct stenosis in chronic pancreatitis. *Gastroenterology* 1976; 70: 562–567.
374. Perri V, Boškoski I, Tringali A, et al. Fully covered self-expandable metal stents in biliary strictures caused by chronic pancreatitis not responding to plastic stenting: A prospective study with 2 years of follow-up. *Gastrointest Endosc* 2012; 75: 1271–1277.
375. Mahajan A, Ho H, Sauer B, et al. Temporary placement of fully covered self-expandable metal stents in benign biliary strictures: Midterm evaluation (with video). *Gastrointest Endosc* 2009; 70: 303–309.
376. Behm B, Brock A, Clarke BW, et al. Partially covered self-expandable metallic stents for benign biliary strictures due to chronic pancreatitis. *Endoscopy* 2009; 41: 547–551.
377. Cahen DL, Rauws EA, Gouma DJ, et al. Removable fully covered self-expandable metal stents in the treatment of common bile duct strictures due to chronic pancreatitis: A case series. *Endoscopy* 2008; 40: 697–700.
378. Kahaleh M, Brijbassie A, Sethi A, et al. Multicenter trial evaluating the use of covered self-expanding metal stents in benign biliary strictures: Time to revisit our therapeutic options? *J Clin Gastroenterol* 2013; 47: 695–699.
379. Van Berkel AM, Cahen DL, van Westerlo DJ, et al. Self-expanding metal stents in benign biliary strictures due to chronic pancreatitis. *Endoscopy* 2004; 36: 381–384.
380. Cantù P, Hookey LC, Morales A, et al. The treatment of patients with symptomatic common bile duct stenosis secondary to chronic pancreatitis using partially covered metal stents: A pilot study. *Endoscopy* 2005; 37: 735–739.
381. Haapamäki C, Kylänpää L, Udd M, et al. Randomized multicenter study of multiple plastic stents vs covered selfexpandable metallic stent in the treatment of biliary stricture in chronic pancreatitis. *Endoscopy* 2015; 47: 605–610.
382. Siiki A, Helminen M, Sand J, et al. Covered self-expanding metal stents may be preferable to plastic stents in the treatment of chronic pancreatitis-related biliary strictures: A systematic review comparing 2 methods of stent therapy in benign biliary strictures. *J Clin Gastroenterol* 2014; 48: 635–643.
383. Deviere J, Nageshwar P, Reddy D, et al. Successful management of benign biliary strictures with fully covered self-expanding metal stents. *Gastroenterology* 2014; 147: 385–395.



384. Kiehne K, Fölsch UR and Nitsche R. High complication rate of bile duct stents in patients with chronic alcoholic pancreatitis due to noncompliance. *Endoscopy* 2000; 32: 377–380.
385. Pozsár J, Sahin P, László F, et al. Medium-term results of endoscopic treatment of common bile duct strictures in chronic calcifying pancreatitis with increasing numbers of stents. *J Clin Gastroenterol* 2004; 38: 118–123.
386. Regimbeau J-M, Fuks D, Bartoli E, et al. A comparative study of surgery and endoscopy for the treatment of bile duct stricture in patients with chronic pancreatitis. *Surg Endosc* 2012; 26: 2902–2908.
387. Wang W, Liao Z, Li Z-S, et al. Chronic pancreatitis in Chinese children: Etiology, clinical presentation and imaging diagnosis. *J Gastroenterol Hepatol* 2009; 24: 1862–1868.
388. Varadarajulu S, Wilcox CM, Hawes RH, et al. Technical outcomes and complications of ERCP in children. *Gastrointest Endosc* 2004; 60: 367–371.
389. Agarwal J, Nageshwar Reddy D, Talukdar R, et al. ERCP in the management of pancreatic diseases in children. *Gastrointest Endosc* 2014; 79: 271–278.
390. Li Z-S, Wang W, Liao Z, et al. A long-term follow-up study on endoscopic management of children and adolescents with chronic pancreatitis. *Am J Gastroenterol* 2010; 105: 1884–1892.
391. Oracz G, Pertkiewicz J, Kierkus J, et al. Efficiency of pancreatic duct stenting therapy in children with chronic pancreatitis. *Gastrointest Endosc* 2014; 80: 1022–1029.
392. Iqbal CW, Moir CR and Ishitani MB. Management of chronic pancreatitis in the pediatric patient: Endoscopic retrograde cholangiopancreatography vs operative therapy. *J Pediatr Surg* 2009; 44: 139–143; discussion 143.
393. Kargl S, Kienbauer M, Duba HC, et al. Therapeutic step-up strategy for management of hereditary pancreatitis in children. *J Pediatr Surg* 2015; 50: 511–514.
394. Giefer MJ and Kozarek RA. Technical outcomes and complications of pediatric ERCP. *Surg Endosc* 2015; 29: 3543–3550.
395. Barthet M, Bugallo M, Moreira LS, et al. Management of cysts and pseudocysts complicating chronic pancreatitis. A retrospective study of 143 patients. *Gastroenterol Clin Biol* 1993; 17: 270–276.
396. Lerch MM, Stier A, Wahnschaffe U, et al. Pancreatic pseudocysts: Observation, endoscopic drainage, or resection? *Dt Arztebl Int* 2009; 106: 614–621.
397. Jacobson BC, Baron TH, Adler DG, et al. ASGE guideline: The role of endoscopy in the diagnosis and the management of cystic lesions and inflammatory fluid collections of the pancreas. *Gastrointest Endosc* 2005; 61: 363–370.
398. Yeo CJ, Bastidas JA, Lynch-Nyhan A, et al. The natural history of pancreatic pseudocysts documented by computed tomography. *Surg Gynecol Obstet* 1990; 170: 411–417.
399. Cheruvu CV, Clarke MG, Prentice M, et al. Conservative treatment as an option in the management of pancreatic pseudocyst. *Ann R Coll Surg Engl* 2003; 85: 313–316.
400. Talar-Wojnarowska R, Wozniak B, Pazurek M, et al. Outcome of pseudocysts complicating chronic pancreatitis. *Hepatogastroenterology* 2010; 57: 631–634.
401. Samuelson AL and Shah RJ. Endoscopic management of pancreatic pseudocysts. *Gastroenterol Clin N Am* 2012; 41: 47–62.
402. Barthet M, Lamblin G, Gasmi M, et al. Clinical usefulness of a treatment algorithm for pancreatic pseudocysts. *Gastrointest Endosc* 2008; 67: 245–252.
403. Barkin JS and Hyder SA. Changing concepts in the management of pancreatic pseudocysts. *Gastrointest Endosc* 1989; 35: 62–64.
404. Baron TH, Harewood GC, Morgan DE, et al. Outcome differences after endoscopic drainage of pancreatic necrosis, acute pancreatic pseudocysts, and chronic pancreatic pseudocysts. *Gastrointest Endosc* 2002; 56: 7–17.
405. Binmoeller KF, Seifert H, Walter A, et al. Transpapillary and transmural drainage of pancreatic pseudocysts. *Gastrointest Endosc* 1995; 42: 219–224.
406. Hookey LC, Debroux S, Delhaye M, et al. Endoscopic drainage of pancreatic-fluid collections in 116 patients: A comparison of etiologies, drainage techniques, and outcomes. *Gastrointest Endosc* 2006; 63: 635–643.
407. Park DH, Lee SS, Moon SH, et al. Endoscopic ultrasound-guided versus conventional transmural drainage for pancreatic pseudocysts: A prospective randomized trial. *Endoscopy* 2009; 41: 842–848.
408. Varadarajulu S, Christein JD, Tamhane A, et al. Prospective randomized trial comparing EUS and EGD for transmural drainage of pancreatic pseudocysts (with videos). *Gastrointest Endosc* 2008; 68: 1102–1111.
409. Arvanitakis M, Delhaye M, Bali MA, et al. Pancreatic-fluid collections: A randomized controlled trial regarding stent removal after endoscopic transmural drainage. *Gastrointest Endosc* 2007; 65: 609–619.
410. Bang JY, Hawes R, Bartolucci A, et al. Efficacy of metal and plastic stents for transmural drainage of pancreatic fluid collections: A systematic review. *Digest Endosc* 2015; 27: 486–498.
411. Breslin N and Wallace MB. Diagnosis and fine needle aspiration of pancreatic pseudocysts: The role of endoscopic ultrasound. *Gastrointest Endosc Clin N Am* 2002; 12: 781–790.
412. Sriram PV, Kaffes AJ, Rao GV, et al. Endoscopic ultrasound-guided drainage of pancreatic pseudocysts complicated by portal hypertension or by intervening vessels. *Endoscopy* 2005; 37: 231–235.
413. Gouyon B, Lévy P, Ruzsniwski P, et al. Predictive factors in the outcome of pseudocysts complicating alcoholic chronic pancreatitis. *Gut* 1997; 41: 821–825.
414. Bradley EL, Clements JL Jr and Gonzalez AC. The natural history of pancreatic pseudocysts: A unified concept of management. *Am J Surg* 1979; 137: 135–141.
415. Lankisch PG, Weber-Dany B, Maisonneuve P, et al. Pancreatic pseudocysts: Prognostic factors for their development and their spontaneous resolution in the setting of acute pancreatitis. *Pancreatolgy* 2012; 12: 85–90.

416. Warshaw AL and Rattner DW. Timing of surgical drainage for pancreatic pseudocyst. Clinical and chemical criteria. *Ann Surg* 1985; 202: 720–724.
417. Tanaka M, Fernandez-del Castillo C, Adsay V, et al. International consensus guidelines 2012 for the management of IPMN and MCN of the pancreas. *Pancreatol* 2012; 12: 183–197.
418. Arnelo U, Siiki A, Swahn F, et al. Single-operator pancreatoscopy is helpful in the evaluation of suspected intraductal papillary mucinous neoplasms (IPMN). *Pancreatol* 2014; 14: 510–514.
419. Löhner JM, Lonnebro R, Stigliano S, et al. Outcome of probe-based confocal laser endomicroscopy (pCLE) during endoscopic retrograde cholangiopancreatography: A single-center prospective study in 45 patients. *United European Gastroenterol J* 2015; 3: 551–560.
420. Spinelli KS, Fromwiller TE, Daniel RA, et al. Cystic pancreatic neoplasms: Observe or operate. *Ann Surg* 2004; 239: 651–657; discussion 657.
421. Del Chiaro M, Verbeke C, Salvia R, et al. European experts consensus statement on cystic tumours of the pancreas. *Dig Liver Dis* 2013; 45: 703–711.
422. Pozzi-Mucelli RM, Rinta-Kiikka I, Wunsche K, et al. Pancreatic MRI for the surveillance of cystic neoplasms: Comparison of a short with a comprehensive imaging protocol. *Eur Radiol* 2017; 27: 41–50.
423. Marchegiani G and Fernández-del Castillo C. Is it safe to follow side branch IPMNs? *Adv Surg* 2014; 48: 13–25.
424. Sahara K, Fernández-del Castillo C, Dong F, et al. Not all mixed-type intraductal papillary mucinous neoplasms behave like main-duct lesions: Implications of minimal involvement of the main pancreatic duct. *Surgery* 2014; 156: 611–621.
425. Nealon WH and Walser E. Duct drainage alone is sufficient in the operative management of pancreatic pseudocyst in patients with chronic pancreatitis. *Ann Surg* 2003; 237: 614–620; discussion 620.
426. Deviere J, Bueso H and Baize M. Complete disruption of the main pancreatic duct: Endoscopic management. *Gastrointest Endosc* 1995; 42: 445–451.
427. Pelaez-Luna M, Vege SS, Petersen BT, et al. Disconnected pancreatic duct syndrome in severe acute pancreatitis: Clinical and imaging characteristics and outcomes in a cohort of 31 cases. *Gastrointest Endosc* 2008; 68: 91–97.
428. Trevino JM, Trevino JM, Tamhane A, et al. Successful stenting in ductal disruption favorably impacts treatment outcomes in patients undergoing transmural drainage of peripancreatic fluid collections. *J Gastroenterol Hepatol* 2010; 25: 526–531.
429. Lawrence C, Howell DA, Stefan AM, et al. Disconnected pancreatic tail syndrome: Potential for endoscopic therapy and results of long-term follow-up. *Gastrointest Endosc* 2008; 67: 673–679.
430. Barthet M, Sahel J, Bodiou-Bertei C, et al. Endoscopic transpapillary drainage of pancreatic pseudocysts. *Gastrointest Endosc* 1995; 42: 208–213.
431. Delhaye M, Matos C and Deviere J. Endoscopic technique for the management of pancreatitis and its complications. *Best Pract Res Clin Gastroenterol* 2004; 18: 155–181.
432. Balachandra S and Siriwardena AK. Systematic appraisal of the management of the major vascular complications of pancreatitis. *Am J Surg* 2005; 190: 489–495.
433. Udd M, Leppaniemi AK, Bidel S, et al. Treatment of bleeding pseudoaneurysms in patients with chronic pancreatitis. *World J Surg* 2007; 31: 504–510.
434. Toyoki Y, Hakamada K, Narumi S, et al. Hemosuccus pancreaticus: Problems and pitfalls in diagnosis and treatment. *World J Gastroenterol* 2008; 14: 2776–2779.
435. Bergert H, Dobrowolski F, Caffier S, et al. Prevalence and treatment of bleeding complications in chronic pancreatitis. *Langenbecks Arch Surg* 2004; 389: 504–510.
436. International Association of Pancreatology (IAP) Working Group. IAP/APA evidence-based guidelines for the management of acute pancreatitis. *Pancreatol* 2013; 13: e1–e15.
437. Morgan DE, Baron TH, Smith JK, et al. Pancreatic fluid collections prior to intervention: Evaluation with MR imaging compared with CT and US. *Radiology* 1997; 203: 773–778.
438. Rana SS, Chaudhary V, Sharma R, et al. Comparison of abdominal ultrasound, endoscopic ultrasound and magnetic resonance imaging in detection of necrotic debris in walled-off pancreatic necrosis. *Gastroenterol Rep (Oxf)* 2016; 4: 50–53.
439. Ammann RW, Buehler H, Muench R, et al. Differences in the natural history of idiopathic (nonalcoholic) and alcoholic chronic pancreatitis. A comparative long-term study of 287 patients. *Pancreas* 1987; 2: 368–377.
440. Miyake H, Harada H, Kunichika K, et al. Clinical course and prognosis of chronic pancreatitis. *Pancreas* 1987; 2: 378–385.
441. Wang LW, Li ZS, Li SD, et al. Prevalence and clinical features of chronic pancreatitis in China: A retrospective multicenter analysis over 10 years. *Pancreas* 2009; 38: 248–254.
442. Mullady DK, Yadav D, Amann ST, et al. Type of pain, pain-associated complications, quality of life, disability and resource utilisation in chronic pancreatitis: A prospective cohort study. *Gut* 2011; 60: 77–84.
443. Olesen SS, Bouwense SA, Wilder-Smith OH, et al. Pregabalin reduces pain in patients with chronic pancreatitis in a randomized, controlled trial. *Gastroenterology* 2011; 141: 536–543.
444. Poulsen JL, Olesen SS, Malver LP, et al. Pain and chronic pancreatitis: A complex interplay of multiple mechanisms. *World J Gastroenterol* 2013; 19: 7282–7291.
445. Ebbelohj N, Borly L, Madsen P, et al. Pancreatic tissue pressure and pain in chronic pancreatitis. *Pancreas* 1986; 1: 556–558.
446. Drewes AM, Krarup AL, Detlefsen S, et al. Pain in chronic pancreatitis: The role of neuropathic pain mechanisms. *Gut* 2008; 57: 1616–1627.
447. Demir IE, Friess H and Ceyhan GO. Neural plasticity in pancreatitis and pancreatic cancer. *Nat Rev Gastroenterol Hepatol* 2015; 12: 649–659.

448. Lelic D, Olesen SS, Graversen C, et al. Electrophysiology as a tool to unravel the origin of pancreatic pain. *World J Gastrointest Pathophysiol* 2014; 5: 33–39.
449. Dimcevski G, Sami SA, Funch-Jensen P, et al. Pain in chronic pancreatitis: The role of reorganization in the central nervous system. *Gastroenterology* 2007; 132: 1546–1556.
450. Ammann RW and Muellhaupt B. The natural history of pain in alcoholic chronic pancreatitis. *Gastroenterology* 1999; 116: 1132–1140.
451. Lankisch PG, Löhr-Happe A, Otto J, et al. [Natürlicher Verlauf der chronischen Pankreatitis – Schmerz, exokrine und endokrine Pankreasinsuffizienz und Prognose der Erkrankung]. *Zentralbl Chir* 1995; 120: 278–286.
452. Girdwood AH, Marks IN, Bornman PC, et al. Does progressive pancreatic insufficiency limit pain in calcific pancreatitis with duct stricture or continued alcohol insult? *J Clin Gastroenterol* 1981; 3: 241–245.
453. Olesen SS, Juel J, Nielsen AK, et al. Pain severity reduces life quality in chronic pancreatitis: Implications for design of future outcome trials. *Pancreatol* 2014; 14: 497–502.
454. Lieb JG 2nd and Forsmark CE. Pain and chronic pancreatitis. *Aliment Pharmacol Ther* 2009; 29: 706–719.
455. Frokjaer JB, Olesen SS and Drewes AM. Fibrosis, atrophy, and ductal pathology in chronic pancreatitis are associated with pancreatic function but independent of symptoms. *Pancreas* 2013; 42: 1182–1187.
456. Brock C, Olesen SS, Valeriani M, et al. Brain activity in rectosigmoid pain: Unravelling conditioning pain modulatory pathways. *Clin Neurophysiol* 2012; 123: 829–837.
457. Dworkin RH, Turk DC, Peirce-Sandner S, et al. Research design considerations for confirmatory chronic pain clinical trials: IMMPACT recommendations. *Pain* 2010; 149: 177–193.
458. Fitzsimmons D, Johnson CD, George S, et al. Development of a disease specific quality of life (QoL) questionnaire module to supplement the EORTC core cancer QoL questionnaire, the QLQ-C30 in patients with pancreatic cancer. EORTC Study Group on Quality of Life. *Eur J Cancer* 1999; 35: 939–941.
459. Strum WB. Abstinence in alcoholic chronic pancreatitis. Effect on pain and outcome. *J Clin Gastroenterol* 1995; 20: 37–41.
460. Cote GA, Yadav D, Slivka A, et al. Alcohol and smoking as risk factors in an epidemiology study of patients with chronic pancreatitis. *Clin Gastroenterol Hepatol* 2011; 9: 266–273.
461. Tolstrup JS, Kristiansen L, Becker U, et al. Smoking and risk of acute and chronic pancreatitis among women and men: A population-based cohort study. *Arch Intern Med* 2009; 169: 603–609.
462. Olesen SS, Juel J, Graversen C, et al. Pharmacological pain management in chronic pancreatitis. *World J Gastroenterol* 2013; 19: 7292–7301.
463. Brown A, Hughes M, Tenner S, et al. Does pancreatic enzyme supplementation reduce pain in patients with chronic pancreatitis: A meta-analysis. *Am J Gastroenterol* 1997; 92: 2032–2035.
464. Winstead NS and Wilcox CM. Clinical trials of pancreatic enzyme replacement for painful chronic pancreatitis—a review. *Pancreatol* 2009; 9: 344–350.
465. Bhardwaj P, Garg PK, Maulik SK, et al. A randomized controlled trial of antioxidant supplementation for pain relief in patients with chronic pancreatitis. *Gastroenterology* 2009; 136: 149–159.
466. Siriwardena AK, Mason JM, Sheen AJ, et al. Antioxidant therapy does not reduce pain in patients with chronic pancreatitis: The ANTICIPATE study. *Gastroenterology* 2012; 143: 655–663.
467. Forsmark CE and Liddle RA. The challenging task of treating painful chronic pancreatitis. *Gastroenterology* 2012; 143: 533–535.
468. Ahmed Ali U, Jens S, Busch OR, et al. Antioxidants for pain in chronic pancreatitis. *Cochrane Database Syst Rev* 2014; 8: CD008945.
469. Jadad AR and Browman GP. The WHO analgesic ladder for cancer pain management. Stepping up the quality of its evaluation. *JAMA* 1995; 274: 1870–1873.
470. Thiagarajan P and Jankowski JA. Aspirin and NSAIDs; benefits and harms for the gut. *Best Pract Res Clin Gastroenterol* 2012; 26: 197–206.
471. Wilder-Smith CH, Hill L, Osler W, et al. Effect of tramadol and morphine on pain and gastrointestinal motor function in patients with chronic pancreatitis. *Dig Dis Sci* 1999; 44: 1107–1116.
472. Drewes AM, Jensen RD, Nielsen LM, et al. Differences between opioids: Pharmacological, experimental, clinical and economical perspectives. *Br J Clin Pharmacol* 2013; 75: 60–78.
473. Staal E, Nienhuijs SW, Keemers-Gels ME, et al. The impact of pain on daily activities following open mesh inguinal hernia repair. *Hernia* 2008; 12: 153–157.
474. Eisenach JC, Carpenter R and Curry R. Analgesia from a peripherally active kappa-opioid receptor agonist in patients with chronic pancreatitis. *Pain* 2003; 101: 89–95.
475. Sengupta JN, Su X and Gebhart GF. Kappa, but not mu or delta, opioids attenuate responses to distention of afferent fibers innervating the rat colon. *Gastroenterology* 1996; 111: 968–980.
476. Niemann T, Madsen LG, Larsen S, et al. Opioid treatment of painful chronic pancreatitis. *Int J Pancreatol* 2000; 27: 235–240.
477. Brock C, Olesen SS, Olesen AE, et al. Opioid-induced bowel dysfunction: Pathophysiology and management. *Drugs* 2012; 72: 1847–1865.
478. Drossman D and Szigethy E. The narcotic bowel syndrome: A recent update. *Am J Gastroenterol* 2014; 2: 22–30.
479. Clarke BR, Slivka A, Tomizawa Y, et al. Endoscopic therapy is effective for patients with chronic pancreatitis. *Clin Gastroenterol Hepatol* 2012; 10: 795–802.
480. Weber A, Schneider J, Neu B, et al. Endoscopic stent therapy in patients with chronic pancreatitis: A 5-year follow-up study. *World J Gastroenterol* 2013; 19: 715–720.
481. Rutter K, Ferlitsch A, Sautner T, et al. Hospitalization, frequency of interventions, and quality of life after

- endoscopic, surgical, or conservative treatment in patients with chronic pancreatitis. *World J Surg* 2010; 34: 2642–2647.
482. Karasawa Y, Kawa S, Aoki Y, et al. Extracorporeal shock wave lithotripsy of pancreatic duct stones and patient factors related to stone disintegration. *J Gastroenterol* 2002; 37: 369–375.
483. Noble M and Gress FG. Techniques and results of neurolysis for chronic pancreatitis and pancreatic cancer pain. *Curr Gastroenterol Rep* 2006; 8: 99–103.
484. Santosh D, Lakhtakia S, Gupta R, et al. Clinical trial: A randomized trial comparing fluoroscopy guided percutaneous technique vs. endoscopic ultrasound guided technique of coeliac plexus block for treatment of pain in chronic pancreatitis. *Aliment Pharmacol Ther* 2009; 29: 979–984.
485. Michaels AJ and Draganov PV. Endoscopic ultrasonography guided celiac plexus neurolysis and celiac plexus block in the management of pain due to pancreatic cancer and chronic pancreatitis. *World J Gastroenterol* 2007; 13: 3575–3580.
486. Garcea G, Thomasset S, Berry DP, et al. Percutaneous splanchnic nerve radiofrequency ablation for chronic abdominal pain. *ANZ J Surg* 2005; 75: 640–644.
487. Issa Y, Ahmed Ali U, Bouwense SA, et al. Preoperative opioid use and the outcome of thoracoscopic splanchnicectomy in chronic pancreatitis: A systematic review. *Surg Endosc* 2014; 28: 405–412.
488. Capurso G, Cocomello L, Benedetto U, et al. Meta-analysis: The placebo rate of abdominal pain remission in clinical trials of chronic pancreatitis. *Pancreas* 2012; 41: 1125–1131.
489. Kongkam P, Wagner DL, Sherman S, et al. Intrathecal narcotic infusion pumps for intractable pain of chronic pancreatitis: A pilot series. *Am J Gastroenterol* 2009; 104: 1249–1255.
490. Werner G and Wetterfors J. Treatment of pain in chronic pancreatitis by irradiation. *Acta Radiol Ther Phys Biol* 1973; 12: 9–16.
491. Guarner L, Navalpotro B, Molero X, et al. Management of painful chronic pancreatitis with single-dose radiotherapy. *Am J Gastroenterol* 2009; 104: 349–355.
492. Kapural L, Cywinski JB and Sparks DA. Spinal cord stimulation for visceral pain from chronic pancreatitis. *Neuromodulation* 2011; 14: 423–426; discussion 426–427.
493. Fregni F, Potvin K, Dasilva D, et al. Clinical effects and brain metabolic correlates in non-invasive cortical neuromodulation for visceral pain. *Eur J Pain* 2011; 15: 53–60.
494. Ballegaard S, Christophersen SJ, Dawids SG, et al. Acupuncture and transcutaneous electric nerve stimulation in the treatment of pain associated with chronic pancreatitis. A randomized study. *Scand J Gastroenterol* 1985; 20: 1249–1254.
495. Ng SS, Leung WW, Hon SS, et al. Electroacupuncture for ileus after laparoscopic colorectal surgery: A randomized sham-controlled study. *Hong Kong Med J* 2013; 19: S33–S35.
496. Pasricha PJ. Unraveling the mystery of pain in chronic pancreatitis. *Nat Rev Gastroenterol Hepatol* 2012; 9: 140–151.
497. Wilcox CM, Yadav D, Ye T, et al. Chronic pancreatitis pain pattern and severity are independent of abdominal imaging findings. *Clin Gastroenterol Hepatol* 2015; 13: 552–560; quiz e28–e29.
498. Poulsen JL, Brock C, Olesen AE, et al. Evolving paradigms in the treatment of opioid-induced bowel dysfunction. *Therap Adv Gastroenterol* 2015; 8: 360–372.
499. Izbicke JR, Bloechle C, Knoefel WT, et al. [Drainage versus resection in surgical therapy of chronic pancreatitis of the head of the pancreas: A randomized study]. *Chirurg* 1997; 68: 369–377.
500. Rios GA, Adams DB, Yeoh KG, et al. Outcome of lateral pancreaticojejunostomy in the management of chronic pancreatitis with nondilated pancreatic ducts. *J Gastrointest Surg* 1998; 2: 223–229.
501. Isaji S. Has the Partington procedure for chronic pancreatitis become a thing of the past? A review of the evidence. *J Hepatobiliary Pancreat Sci* 2010; 17: 763–769.
502. Sakorafas GH, Farnell MB, Farley DR, et al. Long-term results after surgery for chronic pancreatitis. *Int J Pancreatol* 2000; 27: 131–142.
503. Sakorafas GH, Sarr MG, Rowland CM, et al. Postobstructive chronic pancreatitis: Results with distal resection. *Arch Surg* 2001; 136: 643–648.
504. Gall FP, Muhe E and Gebhardt C. Results of partial and total pancreaticoduodenectomy in 117 patients with chronic pancreatitis. *World J Surg* 1981; 5: 269–275.
505. Frey CF and Smith GJ. Description and rationale of a new operation for chronic pancreatitis. *Pancreas* 1987; 2: 701–707.
506. Bramis K, Gordon-Weeks AN, Friend PJ, et al. Systematic review of total pancreatectomy and islet autotransplantation for chronic pancreatitis. *Br J Surg* 2012; 99: 761–766.
507. Issa Y, van Santvoort HC, van Goor H, et al. Surgical and endoscopic treatment of pain in chronic pancreatitis: A multidisciplinary update. *Digest Surg* 2013; 30: 35–50.
508. Cederholm T, Bosaeus I, Barazzoni R, et al. Diagnostic criteria for malnutrition – An ESPEN consensus statement. *Clin Nutr* 2015; 34: 335–340.
509. Sobotka L and Allison SP (eds). *European Society of Clinical Nutrition and Metabolism. Basics in clinical nutrition*. Prague: Galen, 2004; ■■: ■■.
510. Duggan SN, Smyth ND, Murphy A, et al. High prevalence of osteoporosis in patients with chronic pancreatitis: A systematic review and meta-analysis. *Clin Gastroenterol Hepatol* 2014; 12: 219–228.
511. Gubergrits N, Malecka-Panas E, Lehman GA, et al. A 6-month, open-label clinical trial of pancrelipase delayed-release capsules (Creon) in patients with exocrine pancreatic insufficiency due to chronic pancreatitis or pancreatic surgery. *Aliment Pharmacol Ther* 2011; 33: 1152–1161.
512. Regunath H, Shivakumar BM, Kurien A, et al. Anthropometric measurements of nutritional status in

- chronic pancreatitis in India: Comparison of tropical and alcoholic pancreatitis. *Indian J Gastroenterol* 2011; 30: 78–83.
513. Tinju J, Reshmi S, Rajesh G, et al. Anthropometric, biochemical, clinical and dietary assessment for malnutrition in south Indian patients with chronic pancreatitis. *Trop Gastroenterol* 2010; 31: 285–290.
  514. Wehler M, Nichterlein R, Fischer B, et al. Factors associated with health-related quality of life in chronic pancreatitis. *Am J Gastroenterol* 2004; 99: 138–146.
  515. Pezzilli R, Morselli-Labate AM, Frulloni L, et al. The quality of life in patients with chronic pancreatitis evaluated using the SF-12 questionnaire: A comparative study with the SF-36 questionnaire. *Dig Liver Dis* 2006; 38: 109–115.
  516. Sikkens EC, Cahen DL, van Eijck C, et al. Patients with exocrine insufficiency due to chronic pancreatitis are undertreated: A Dutch national survey. *Pancreatol* 2012; 12: 71–73.
  517. Marotta F, Labadarios D, Frazer L, et al. Fat-soluble vitamin concentration in chronic alcohol-induced pancreatitis. Relationship with steatorrhea. *Dig Dis Sci* 1994; 39: 993–998.
  518. Duggan SN, Smyth ND, O’Sullivan M, et al. The prevalence of malnutrition and fat-soluble vitamin deficiencies in chronic pancreatitis. *Nutr Clin Pract* 2014; 29: 348–354.
  519. Dutta SK, Bustin MP, Russell RM, et al. Deficiency of fat-soluble vitamins in treated patients with pancreatic insufficiency. *Ann Intern Med* 1982; 97: 549–552.
  520. Sikkens EC, Cahen DL, Koch AD, et al. The prevalence of fat-soluble vitamin deficiencies and a decreased bone mass in patients with chronic pancreatitis. *Pancreatol* 2013; 13: 238–242.
  521. Klapdor S, Richter E and Klapdor R. Vitamin D status and per-oral vitamin D supplementation in patients suffering from chronic pancreatitis and pancreatic cancer disease. *Anticancer Res* 2012; 32: 1991–1998.
  522. Duggan SN, Purcell C, Kilbane M, et al. An association between abnormal bone turnover, systemic inflammation, and osteoporosis in patients with chronic pancreatitis: A case-matched study. *Am J Gastroenterol* 2015; 110: 336–345.
  523. Lasztity N, Biro L, Nemeth E, et al. Protein status in pancreatitis–transferrin is a sensitive biomarker of malnutrition in acute and chronic pancreatitis. *Clin Chem Lab Med* 2002; 40: 1320–1324.
  524. Girish BN, Rajesh G, Vaidyanathan K, et al. Zinc status in chronic pancreatitis and its relationship with exocrine and endocrine insufficiency. *J Pancreas* 2009; 10: 651–656.
  525. Van Gossum A, Closset P, Noel E, et al. Deficiency in antioxidant factors in patients with alcohol-related chronic pancreatitis. *Dig Dis Sci* 1996; 41: 1225–1231.
  526. Gianotti L, Meier R, Lobo DN, et al. ESPEN guidelines on parenteral nutrition: Pancreas. *Clin Nutr* 2009; 28: 428–435.
  527. Kondrup J, Allison SP, Elia M, et al.; Educational and Clinical Practice Committee, European Society of Parenteral and Enteral Nutrition (ESPEN). ESPEN guidelines for nutrition screening 2002. *Clin Nutr* 2003; 22: 415–421.
  528. Johansen N, Kondrup J, Plum LM, et al. Effect of nutritional support on clinical outcome in patients at nutritional risk. *Clin Nutr* 2004; 23: 539–550.
  529. Sorensen J, Kondrup J, Prokopowicz J, et al. EuroOOPS: An international, multicentre study to implement nutritional risk screening and evaluate clinical outcome. *Clin Nutr* 2008; 27: 340–349.
  530. Singh S, Midha S, Singh N, et al. Dietary counseling versus dietary supplements for malnutrition in chronic pancreatitis: A randomized controlled trial. *Clin Gastroenterol Hepatol* 2008; 6: 353–359.
  531. Vaona B, Armellini F, Bovo P, et al. Food intake of patients with chronic pancreatitis after onset of the disease. *Am J Clin Nutr* 1997; 65: 851–854.
  532. Duggan S, O’Sullivan M, Feehan S, et al. Nutrition treatment of deficiency and malnutrition in chronic pancreatitis: A review. *Nutr Clin Pract* 2010; 25: 362–370.
  533. Mirtallo JM, Forbes A, McClave SA, et al. International consensus guidelines for nutrition therapy in pancreatitis. *JPEN J Parenter Enteral Nutr* 2012; 36: 284–291.
  534. Ladas SD, Giorgiotis K and Raptis SA. Complex carbohydrate malabsorption in exocrine pancreatic insufficiency. *Gut* 1993; 34: 984–987.
  535. Caliari S, Benini L, Sembenini C, et al. Medium-chain triglyceride absorption in patients with pancreatic insufficiency. *Scand J Gastroenterol* 1996; 31: 90–94.
  536. Dominguez-Munoz JE. Pancreatic enzyme replacement therapy for pancreatic exocrine insufficiency: When is it indicated, what is the goal and how to do it? *Adv Med Sci* 2011; 56: 1–5.
  537. Imrie CW, Connett G, Hall RI, et al. Review article: Enzyme supplementation in cystic fibrosis, chronic pancreatitis, pancreatic and periampullary cancer. *Aliment Pharmacol Ther* 2010; 32: S1–S25.
  538. Dutta SK and Hlasko J. Dietary fiber in pancreatic disease: Effect of high fiber diet on fat malabsorption in pancreatic insufficiency and in vitro study of the interaction of dietary fiber with pancreatic enzymes. *Am J Clin Nutr* 1985; 41: 517–525.
  539. Caliari S, Benini L, Bonfante F, et al. Pancreatic extracts are necessary for the absorption of elemental and polymeric enteral diets in severe pancreatic insufficiency. *Scand J Gastroenterol* 1993; 28: 749–752.
  540. Toouli J, Biankin AV, Oliver MR, et al. Management of pancreatic exocrine insufficiency: Australasian Pancreatic Club recommendations. *Med J Austral* 2010; 193: 461–467.
  541. Bang UC, Matzen P, Benfield T, et al. Oral cholecalciferol versus ultraviolet radiation B: Effect on vitamin D metabolites in patients with chronic pancreatitis and fat malabsorption – a randomized clinical trial. *Pancreatol* 2011; 11: 376–382.
  542. Reddy SVB, Ramesh V and Bhatia E. Double blind randomized control study of intramuscular vitamin D3 supplementation in tropical calcific pancreatitis. *Calcif Tissue Int* 2013; 93: 48–54.

543. Duggan SN and Conlon KC. Bone health guidelines for patients with chronic pancreatitis. *Gastroenterology* 2013; 145: 911.
544. Lordan JT, Phillips ME, Chun JY, et al. A safe, effective, and cheap method of achieving pancreatic rest in patients with chronic pancreatitis with refractory symptoms and malnutrition. *Pancreas* 2009; 38: 689–692.
545. Skipworth JRA, Raptis DA, Wijesuriya S, et al. The use of nasojejunal nutrition in patients with chronic pancreatitis. *J Pancreas* 2011; 12: 574–580.
546. Keefe S, Rolniak S, Raina A, et al. Enteral feeding patients with gastric outlet obstruction. *Nutr Clin Pract* 2012; 27: 76–81.
547. Silk DBA. Formulation of enteral diets for use in jejunal enteral feeding. *Proc Nutr Soc* 2008; 67: 270–272.
548. Ferrie S, Graham C and Hoyle M. Pancreatic enzyme supplementation for patients receiving enteral feeds. *Nutr Clin Pract* 2011; 26: 349–351.
549. Duggan SN, O'Sullivan M, Hamilton S, et al. Patients with chronic pancreatitis are at increased risk for osteoporosis. *Pancreas* 2012; 41: 1119–1124.
550. Sudeep K, Chacko A, Thomas N, et al. Predictors of osteodystrophy in patients with chronic nonalcoholic pancreatitis with or without diabetes. *Endocr Pract* 2011; 17: 897–905.
551. Drozdov VN, Chernyshova IV, Vinokurova LV, et al. [Role of exocrine pancreatic insufficiency in reducing of the bone mineral density in patients with chronic pancreatitis]. *Eksp Klin Gastroenterol* 2010; 8: 17–22.
552. Schnitzler CM, Mesquita JM, et al. Cortical and trabecular bone microarchitecture and turnover in alcohol-induced chronic pancreatitis: A histomorphometric study. *J Bone Mineral Metabol* 2010; 28: 456–467.
553. Bang UC, Benfield T, Bendtsen F, et al. The risk of fractures among patients with cirrhosis or chronic pancreatitis. *Clin Gastroenterol Hepatol* 2014; 12: 320–326.
554. Tignor AS, Wu BU, Whitlock TL, et al. High prevalence of low-trauma fracture in chronic pancreatitis. *Am J Gastroenterol* 2010; 105: 2680–2686.
555. American Gastroenterological Association (AGA). American Gastroenterological Association medical position statement: Guidelines on osteoporosis in gastrointestinal diseases. *Gastroenterology* 2003; 124: 791–794.
556. Expert Committee on the Diabetes Mellitus. Report of the expert committee on the diagnosis and classification of diabetes mellitus. *Diabetes Care* 2003; 26(Suppl 1): S5–20.
557. American Diabetes Association (ADA). American diagnosis and classification of diabetes mellitus. *Diabetes Care* 2014; 37: S81–S90. doi: 10.2337/dc14-S081.
558. Sah RP, Nagpal SJS, Mukhopadhyay D, et al. New insights into pancreatic cancer-induced paraneoplastic diabetes. *Nat Rev Gastroenterol Hepatol* 2013; 10: 423–433.
559. Ewald N, Kaufmann C, Raspe A, et al. Prevalence of diabetes mellitus secondary to pancreatic diseases (type 3c). *Diab Metab* 2012; 28: 338–342.
560. Rickels MR, Bellin M, Toledo FG, et al. Detection, evaluation and treatment of diabetes mellitus in chronic pancreatitis: Recommendations from PancreasFest 2012. *Pancreatol* 2013; 13: 336–342.
561. Balakrishnan V, Unnikrishnan AG, Thomas V, et al. Chronic pancreatitis. A prospective nationwide study of 1,086 subjects from India. *J Pancreas* 2008; 9: 593–600.
562. Rajesh G, Veena AB, Menon S, et al. Clinical profile of early-onset and late-onset idiopathic chronic pancreatitis in South India. *Indian J Gastroenterol* 2014; 33: 231–236.
563. Ito T, Otsuki M, Igarashi H, et al. Epidemiological study of pancreatic diabetes in Japan in 2005: A nationwide study. *Pancreas* 2010; 39: 829–835.
564. Hirota M, Satoh K, Kikuta K, et al. Early detection of low enhanced pancreatic parenchyma by contrast-enhanced computed tomography predicts poor prognosis of patients with acute pancreatitis. *Pancreas* 2012; 41: 1099–1104.
565. Garg PK and Tandon RK. Survey on chronic pancreatitis in the Asia-Pacific region. *J Gastroenterol Hepatol* 2004; 19: 998–1004.
566. Bhasin DK, Singh G, Rana SS, et al. Clinical profile of idiopathic chronic pancreatitis in North India. *Clin Gastroenterol Hepatol* 2009; 7: 594–599.
567. Rebours V, Boutron-Ruault MC, Schnee M, et al. The natural history of hereditary pancreatitis: A national series. *Gut* 2009; 58: 97–103.
568. Malka D, Hammel P, Sauvanet A, et al. Risk factors for diabetes mellitus in chronic pancreatitis. *Gastroenterology* 2000; 119: 1324–1332.
569. Wang W, Guo Y, Liao Z, et al. Occurrence of and risk factors for diabetes mellitus in Chinese patients with chronic pancreatitis. *Pancreas* 2011; 40: 206–212.
570. Schrader H, Menge BA, Zeidler C, et al. Determinants of glucose control in patients with chronic pancreatitis. *Diabetologia* 2010; 53: 1062–1069.
571. Maisonneuve P, Frulloni L, Muhlaupt B, et al. Impact of smoking on patients with idiopathic chronic pancreatitis. *Pancreas* 2006; 33: 163–168.
572. Maire F, Rebours V, Vullierme MP, et al. Does tobacco influence the natural history of autoimmune pancreatitis? *Pancreatol* 2014; 14: 284–288.
573. Luaces-Regueira M, Iglesias-García J, Lindkvist B, et al. Smoking as a risk factor for complications in chronic pancreatitis. *Pancreas* 2014; 43: 275–280.
574. Madro A, Ciesielka M, Celinski K, et al. The genetic predisposition and its impact on the diabetes mellitus development in patients with alcoholic chronic pancreatitis. *Gastroenterol Res Pract* 2015; 2015: 309156. doi: 10.1155/2015/309156.
575. Castineira-Alvarino M, Lindkvist B and Luaces-Regueira M. The role of high fat diet in the development of complications of chronic pancreatitis. *Clin Nutr* 2013; 32: 830–836.
576. World Health Organization (WHO) *Definition and diagnosis of diabetes and intermediate hyperglycaemia*. New York: WHO, 2015.
577. Vague P and Nguyen L. Rationale and methods for the estimation of insulin secretion in a given patient: From

- research to clinical practice. *Diabetes* 2002; 51: S240–S244.
578. Wakasugi H, Funakoshi A and Iguchi H. Clinical assessment of pancreatic diabetes caused by chronic pancreatitis. *J Gastroenterol* 1998; 33: 254–259.
579. Von Tirpitz C, Glasbrenner B, Mayer D, et al. Comparison of different endocrine stimulation tests in nondiabetic patients with chronic pancreatitis. *Hepatogastroenterology* 1998; 45: 1111–1116.
580. Bonora E and Tuomilehto J. The pros and cons of diagnosing diabetes with A1C. *Diabetes Care* 2011; 34: S184–S190.
581. Ewald N and Bretzel RG. Diabetes mellitus secondary to pancreatic diseases (Type 3c)—are we neglecting an important disease? *Eur J Intern Med* 2013; 24: 203–206.
582. Sauvanet A. [Functional results of pancreatic surgery]. *Rev Prat* 2002; 52: 1572–1575.
583. Duron F and Duron JJ. [Pancreatectomy and diabetes]. *Ann Chir* 1999; 53: 406–411.
584. Dresler CM, Fortner JG, McDermott K, et al. Metabolic consequences of (regional) total pancreatectomy. *Ann Surg* 1991; 214: 131–140.
585. Kiviluoto T, Schröder T, Karonen SL, et al. Glycemic control and serum lipoproteins after total pancreatectomy. *Ann Clin Res* 1985; 17: 110–115.
586. Linde J, Nilsson LH and Barany FR. Diabetes and hypoglycemia in chronic pancreatitis. *Scand J Gastroenterol* 1977; 12: 369–373.
587. Piorowski RJ, Bliedernicht SW, Lawrence W, et al. Pancreatic and periampullary carcinoma. Experience with 200 patients over a 12 year period. *Am J Surg* 1982; 143: 189–193.
588. Forssmann K, Schirr K, Schmid M, et al. [Postoperative follow-up in patients with partial Whipple duodenopancreatectomy for chronic pancreatitis]. *Z Gastroenterol* 1997; 35: 1071–1080.
589. Heise JW, Katoh M, Lüthen R, et al. Long-term results following different extent of resection in chronic pancreatitis. *Hepatogastroenterology* 2001; 48: 864–868.
590. Warren KW, Poulantzas JK and Kune GA. Life after total pancreatectomy for chronic pancreatitis: Clinical study of eight cases. *Ann Surg* 1966; 164: 830–834.
591. Sato T, Noto N, Matsuno S, et al. Follow-up results of surgical treatment for chronic pancreatitis. Present status in Japan. *Am J Surg* 1981; 142: 317–323.
592. Bittner R, Butters M, Büchler M, et al. Glucose homeostasis and endocrine pancreatic function in patients with chronic pancreatitis before and after surgical therapy. *Pancreas* 1994; 9: 47–53.
593. Ruxer J, Mozdzan M, Loba J, et al. [Usefulness of continuous glucose monitoring system in detection of hypoglycaemic episodes in patients with diabetes in course of chronic pancreatitis]. *Polisk Arch Med Wew* 2005; 114: 953–957.
594. Nakamura T, Takebe K, Kudoh K, et al. Decreased counterregulatory hormone responses to insulin-induced hypoglycemia in patients with pancreatic diabetes having autonomic neuropathy. *Tohoku J Exp Med* 1994; 174: 305–315.
595. Hanafusa T, Toyoshima H, Nonaka K, et al. Impaired response of human pancreatic polypeptide to insulin-induced hypoglycemia in chronic pancreatitis without diabetes mellitus. *Endocrinol Jap* 1982; 29: 509–515.
596. Donowitz M, Hendler R, Spiro HM, et al. Glucagon secretion in acute and chronic pancreatitis. *Ann Intern Med* 1975; 83: 778–781.
597. Del Prato S, Riva F, Devidé A, et al. Glucagon levels and ketogenesis in human diabetes following total or partial pancreatectomy and severe chronic pancreatitis. *Acta Diabetol Latina* 1980; 17: 111–118.
598. Larsen S, Hilsted J, Philipsen EK, et al. Glucose counterregulation in diabetes secondary to chronic pancreatitis. *Metabolism* 1990; 39: 138–143.
599. Larsen S, Hilsted J, Tronier B, et al. Pancreatic hormone secretion in chronic pancreatitis without residual beta-cell function. *Acta Endocrinol* 1988; 118: 357–364.
600. Joffe BI, Spitz IM, Hirsch HJ, et al. Hormonal profile after insulin-induced hypoglycemia in chronic calcific pancreatitis. Pancreatic pituitary and adrenal responses. *Horm Metab Res* 1984; 16: S134–S137.
601. Boyle PJ, Kempers SF, O'Connor AM, et al. Brain glucose uptake and unawareness of hypoglycemia in patients with insulin-dependent diabetes mellitus. *N Engl J Med* 1995; 333: 1726–1731.
602. Dammann HG, Besterman HS, Bloom SR, et al. Gut-hormone profile in totally pancreatectomised patients. *Gut* 1981; 22: 103–107.
603. Billings BJ, Christein JD, Harmsen WS, et al. Quality-of-life after total pancreatectomy: Is it really that bad on long-term follow-up? *J Gastrointest Surg* 2005; 9: 1059–1066; discussion 1066.
604. Müller MW, Friess H, Kleeff J, et al. Is there still a role for total pancreatectomy? *Ann Surg* 2007; 246: 966–974; discussion 974–975.
605. Epelboym I, Winner M, DiNorcia J, et al. Quality of life in patients after total pancreatectomy is comparable with quality of life in patients who undergo a partial pancreatic resection. *J Surg Res* 2014; 187: 189–196.
606. Dorlon M, Owczarski S, Wang H, et al. Increase in postoperative insulin requirements does not lead to decreased quality of life after total pancreatectomy with islet cell autotransplantation for chronic pancreatitis. *Am Surg* 2013; 79: 676–680.
607. Roberts KJ, Blanco G, Webber J, et al. How severe is diabetes after total pancreatectomy? A case-matched analysis. *HPB (Oxford)* 2014; 16: 814–821.
608. Jamil LH, Chindris AM, Gill KRS, et al. Glycemic control after total pancreatectomy for intraductal papillary mucinous neoplasm: An exploratory study. *HPB Surgery* 2012; 2012: 381328. doi: 10.1155/2012/381328.
609. Wakasugi H, Hara Y, Abe M, et al. Angiopathies in pancreatic diabetes resulting from chronic pancreatitis. *Int J Pancreatol* 1998; 23: 175–180.
610. Larsen S, Hilsted J, Philipsen EK, et al. A comparative study of microvascular complications in patients with secondary and type 1 diabetes. *Diabet Med* 1990; 7: 815–818.

611. Gasiorowska A, Czupryniak L, Malecka-Panas E, et al. [Microvascular complications in pancreatic diabetes]. *Polsk Arch Med Wew* 2001; 105: 469–474.
612. Ziegler O, Candiloros H, Guerci B, et al. Lower-extremity arterial disease in diabetes mellitus due to chronic pancreatitis. *Diabete Metab* 1994; 20: 540–545.
613. Levitt NS, Adams G, Salmon J, et al. The prevalence and severity of microvascular complications in pancreatic diabetes and IDDM. *Diabetes Care* 1995; 18: 971–974.
614. Briani G, Riva F, Midena E, et al. Prevalence of microangiopathic complications in hyperglycemia secondary to pancreatic disease. *J Diabetic Compl* 1988; 2: 50–52.
615. Verdonk CA, Palumbo PJ, Gharib H, et al. Diabetic microangiopathy in patients with pancreatitic diabetes mellitus. *Diabetologia* 1975; 11: 394–400.
616. Goebel FD. [Diabetic microangiopathy in primary and secondary diabetes mellitus]. *Fortschr Med* 1980; 98: 470–474.
617. Torres Barrera G, Garcia Rubi E, Robles Diaz G, et al. Late complication of diabetes mellitus of pancreatic origin. *Rev Gastroenterol Mex* 1992; 57: 16–20.
618. Ito T, Otsuki M, Itoi T, et al. Pancreatic diabetes in a follow-up survey of chronic pancreatitis in Japan. *J Gastroenterol* 2007; 42: 291–297.
619. Duncan LJ, Macfarlane A and Robson JS. Diabetic retinopathy and nephropathy in pancreatic diabetes. *Lancet* 1958; 1: 822–826.
620. Tiengo A, Segato T, Briani G, et al. The presence of retinopathy in patients with secondary diabetes following pancreatectomy or chronic pancreatitis. *Diabetes Care* 1983; 6: 570–574.
621. Couet C, Genton P, Pointel JP, et al. The prevalence of retinopathy is similar in diabetes mellitus secondary to chronic pancreatitis with or without pancreatectomy and in idiopathic diabetes mellitus. *Diabetes Care* 1985; 8: 323–328.
622. Gullo L, Parenti M, Monti L, et al. Diabetic retinopathy in chronic pancreatitis. *Gastroenterology* 1990; 98: 1577–1581.
623. Maekawa N, Ohneda A, Kai Y, et al. Secondary diabetic retinopathy in chronic pancreatitis. *Am J Ophthalmol* 1978; 85: 835–840.
624. Sevel D, Bristow JH, Bank S, et al. Diabetic retinopathy in chronic pancreatitis. *Arch Ophthalmol* 1971; 86: 245–250.
625. Marre M, Hallab M, Roy J, et al. Glomerular hyperfiltration in type I, type II, and secondary diabetes. *J Diabetic Compl* 1992; 6: 19–24.
626. Garcia H and Tapia JC. Post-pancreatitis diabetes: Clinical experience in 40 cases. *Rev Med Chil* 1994; 122: 1163–1168.
627. Wellmann KF and Volk BW. Nodular intercapillary glomerulosclerosis in diabetes secondary to chronic calcific pancreatitis. *Diabetes* 1976; 25: 713–716.
628. Petrin P, Antoniutti M, Zaramella D, et al. [Clinical course of diabetes in patients operated upon for chronic pancreatitis]. *Minerva Endocrinol* 1991; 16: 179–186.
629. Petrin P, Chiappetta A, Del Favero G, et al. [Chronic pancreatitis and diabetes]. *Minerva Med* 1983; 74: 31–38.
630. Koizumi M, Yoshida Y, Abe N, et al. Pancreatic diabetes in Japan. *Pancreas* 1998; 16: 385–391.
631. Mohan V, Ramachandran A and Viswanathan M. Two case reports of macrovascular complications in fibrocalculous pancreatic diabetes. *Acta Diabetol Latina* 1989; 26: 345–349.
632. Kahl S and Malfertheiner P. Exocrine and endocrine pancreatic insufficiency after pancreatic surgery. *Best Pract Res Clin Gastroenterol* 2004; 18: 947–955.
633. Jethwa P, Sodergren M, Lala A, et al. Diabetic control after total pancreatectomy. *Dig Liver Dis* 2006; 38: 415–419.
634. Hutchins RR, Hart RS, Pacifico M, et al. Long-term results of distal pancreatectomy for chronic pancreatitis in 90 patients. *Ann Surg* 2002; 236: 612–618.
635. Hutchins RR, Kojodjojo P, Ho R, et al. Short and long-term outcome of pancreatic surgery in a district general hospital. *J Royal Coll Surg* 2002; 47: 548–551.
636. Stauffer JA, Nguyen JH, Heckman MG, et al. Patient outcomes after total pancreatectomy: A single centre contemporary experience. *HPB (Oxford)* 2009; 11: 483–492.
637. Reddy S, Wolfgang CL, Cameron JL, et al. Total pancreatectomy for pancreatic adenocarcinoma: Evaluation of morbidity and long-term survival. *Ann Surg* 2009; 250: 282–287.
638. Sakata N, Egawa S, Motoi F, et al. Institutional indications for islet transplantation after total pancreatectomy. *J HBP Surg* 2008; 15: 488–492.
639. Gaia E and Salacone P. Medical complications of pancreatic resections. *J Pancreas* 2007; 8: S114–S117.
640. Cui Y and Andersen DK. Pancreatogenic diabetes: Special considerations for management. *Pancreatology* 2011; 11: 279–294.
641. Choudhuri G, Lakshmi CP and Goel A. Pancreatic diabetes. *Tropical Gastroenterol* 2009; 30: 71–75.
642. Cavallini G, Vaona B, Bovo P, et al. Diabetes in chronic alcoholic pancreatitis. Role of residual beta cell function and insulin resistance. *Dig Dis Sci* 1993; 38: 497–501.
643. Czako L, Hegyi P, Rakonczay Z Jr, et al. Interactions between the endocrine and exocrine pancreas and their clinical relevance. *Pancreatology* 2009; 9: 351–359.
644. Butler PC, Elashoff M, Elashoff R, et al. A critical analysis of the clinical use of incretin-based therapies: Are the GLP-1 therapies safe? *Diabetes Care* 2013; 36: 2118–2125.
645. Gale EAM. Response to comment on: Butler et al A critical analysis of the clinical use of incretin-based therapies: Are the GLP-1 therapies safe?. *Diabetes Care* 2013; 36: 2118–2125; *Diabetes Care* 2013; 36: e214.
646. Raz I, Bhatt DL, Hirshberg B, et al. Incidence of pancreatitis and pancreatic cancer in a randomized controlled multicenter trial (SAVOR-TIMI 53) of the dipeptidyl peptidase-4 inhibitor saxagliptin. *Diabetes Care* 2014; 37: 2435–2441.
647. Lamont BJ and Andrikopoulos S. Hope and fear for new classes of type 2 diabetes drugs: Is there preclinical



- evidence that incretin-based therapies alter pancreatic morphology? *J Endocrinol* 2014; 221: T43–T61.
648. Dehn CA. SGLT inhibition in patients with type 1 diabetes. *Lancet Diab Endocrinol* 2014; 2: 539. doi: 10.1016/S2213-8587(14)70112-3.
649. Hine J, Paterson H, Abrol E, et al. SGLT inhibition and euglycaemic diabetic ketoacidosis. *Lancet Diab Endocrinol* 2015; 3: 503–504.
650. Terzin V, Takács R, Lengyel C, et al. Improved glycemic control in pancreatic diabetes through intensive conservative insulin therapy. *Pancreatology* 2012; 12: 100–103.
651. Ebert R and Creutzfeldt W. Reversal of impaired GIP and insulin secretion in patients with pancreatogenic steatorrhea following enzyme substitution. *Diabetologia* 1980; 19: 198–204.
652. Teichmann J, Mann ST, Stracke H, et al. Alterations of vitamin D3 metabolism in young women with various grades of chronic pancreatitis. *Eur J Med Res* 2007; 12: 347–350.
653. Kuo P, Stevens JE, Russo A, et al. Gastric emptying, incretin hormone secretion, and postprandial glycemia in cystic fibrosis—effects of pancreatic enzyme supplementation. *J Clin Endocrinol Metabol* 2011; 96: E851–E855.
654. Beglinger S, Drewe J, Schirra J, et al. Role of fat hydrolysis in regulating glucagon-like Peptide-1 secretion. *J Clin Endocrinol Metabol* 2010; 95: 879–886.
655. D’Haese JG, Ceyhan GO, Demir IE, et al. Treatment options in painful chronic pancreatitis: A systematic review. *HPB (Oxford)* 2014; 16: 512–521.
656. Yen S, Hsieh CC and MacMahon B. Consumption of alcohol and tobacco and other risk factors for pancreatitis. *Am J Epidemiol* 1982; 116: 407–414.
657. Lin Y, Tamakoshi A, Hayakawa T, et al. Cigarette smoking as a risk factor for chronic pancreatitis: A case-control study in Japan. Research Committee on Intractable Pancreatic Diseases. *Pancreas* 2000; 21: 109–114.
658. Law R, Parsi M, Lopez R, et al. Cigarette smoking is independently associated with chronic pancreatitis. *Pancreatology* 2010; 10: 54–59.
659. Yadav D, Hawes RH, Brand RE, et al. Alcohol consumption, cigarette smoking, and the risk of recurrent acute and chronic pancreatitis. *Arch Intern Med* 2009; 169: 1035–1045.
660. Cavallini G, Talamini G, Vaona B, et al. Effect of alcohol and smoking on pancreatic lithogenesis in the course of chronic pancreatitis. *Pancreas* 1994; 9: 42–46.
661. Imoto M and DiMagno EP. Cigarette smoking increases the risk of pancreatic calcification in late-onset but not early-onset idiopathic chronic pancreatitis. *Pancreas* 2000; 21: 115–119.
662. Hirota M, Shimosegawa T, Masamune A, et al. The seventh nationwide epidemiological survey for chronic pancreatitis in Japan: Clinical significance of smoking habit in Japanese patients. *Pancreatology* 2014; 14: 490–496.
663. Whitcomb DC, Yadav D, Adam S, et al. Multicenter approach to recurrent acute and chronic pancreatitis in the United States: The North American Pancreatitis Study 2 (NAPS2). *Pancreatology* 2008; 8: 520–531.
664. Perk J, De Backer G, Gohlke H, et al. European Guidelines on cardiovascular disease prevention in clinical practice (version 2012). The Fifth Joint Task Force of the European Society of Cardiology and Other Societies on Cardiovascular Disease Prevention in Clinical Practice (constituted by representatives of nine societies and by invited experts). *Eur Heart J* 2012; 33: 1635–1701.
665. European Network for Smoking and Tobacco Prevention Prevention ENfSaT. European smoking cessation guidelines 2012, <http://ensp.org/european-smoking-cessation-guidelines-and-quality-standards/> (2012).
666. Tobacco Use and Dependence Guideline Panel. Treating tobacco use and dependence: 2008 Update Rockville, MD: US Department of Health and Human Services 2008, <http://www.ncbi.nlm.nih.gov/books/NBK63952/> (2008).
667. Stead LF and Lancaster T. Combined pharmacotherapy and behavioural interventions for smoking cessation. *Cochrane Database Syst Rev* 2012; 10: CD008286.
668. Suls JM, Luger TM, Curry SJ, et al. Efficacy of smoking-cessation interventions for young adults: A meta-analysis. *Am J Prev Med* 2012; 42: 655–662.
669. Sankaran SJ, Xiao AY, Wu LM, et al. Frequency of progression from acute to chronic pancreatitis and risk factors: A meta-analysis. *Gastroenterology* 2015; 149: 1490–500.
670. Lowenfels AB, Maisonneuve P, Cavallini G, et al. Prognosis of chronic pancreatitis: An international multicenter study. International Pancreatitis Study Group. *Am J Gastroenterol* 1994; 89: 1467–1471.
671. Nojgaard C, Bendtsen F, Becker U, et al. Danish patients with chronic pancreatitis have a four-fold higher mortality rate than the Danish population. *Clin Gastroenterol Hepatol* 2010; 8: 384–390.
672. Lowenfels AB, Maisonneuve P and Whitcomb DC. Risk factors for cancer in hereditary pancreatitis. International Hereditary Pancreatitis Study Group. *Med Clin North Am* 2000; 84: 565–573.
673. Talamini G, Bassi C, Falconi M, Sartori N, Vaona B, Bovo P, et al. Smoking cessation at the clinical onset of chronic pancreatitis and risk of pancreatic calcifications. *Pancreas* 2007; 35: 320–326.
674. Gullo L, Barbara L and Labo G. Effect of cessation of alcohol use on the course of pancreatic dysfunction in alcoholic pancreatitis. *Gastroenterology* 1988; 95: 1063–1068.
675. Hayakawa T, Kondo T, Shibata T, Sugimoto Y and Kitagawa M. Chronic alcoholism and evolution of pain and prognosis in chronic pancreatitis. *Dig Dis Sci* 1989; 34: 33–38.
676. Eypasch E, Williams JJ, Wood-Dauphinee S, et al. Gastrointestinal Quality of Life Index: Development, validation and application of a new instrument. *Br J Surg* 1995; 82: 216–222.
677. Wewers ME and Lowe NK. A critical review of visual analogue scales in the measurement of clinical phenomena. *Res Nursing Health* 1990; 13: 227–236.

678. Kelemen D and Horváth OP. Clinical experience with different techniques of pancreatic head resection for chronic pancreatitis. *Digest Surg* 2002; 19: 28–34.
679. Osoba D, Rodrigues G, Myles J, et al. Interpreting the significance of changes in health-related quality-of-life scores. *J Clin Oncol* 1998; 16: 139–144.
680. Fitzsimmons D, Kahl S, Butturini G, et al. Symptoms and quality of life in chronic pancreatitis assessed by structured interview and the EORTC QLQ-C30 and QLQ-PAN26. *Am J Gastroenterol* 2005; 100: 918–926.
681. McHorney CA, Ware JE and Raczek AE. The MOS 36-Item Short-Form Health Survey (SF-36): II. Psychometric and clinical tests of validity in measuring physical and mental health constructs. *Med Care* 1993; 31: 247–263.
682. Pezzilli R, Morselli Labate AM, et al. Quality of life and clinical indicators for chronic pancreatitis patients in a 2-year follow-up study. *Pancreas* 2007; 34: 191–196.
683. Stevens T, Costanzo A, Lopez R, et al. Adding triamcinolone to endoscopic ultrasound-guided celiac plexus blockade does not reduce pain in patients with chronic pancreatitis. *Clin Gastroenterol Hepatol* 2012; 10: 186–191.
684. Baghdadi S, Abbas MH, Albouz F, et al. Systematic review of the role of thoracoscopic splanchnicectomy in palliating the pain of patients with chronic pancreatitis. *Surg Endosc* 2008; 22: 580–588.
685. Milovic V, Wehrmann T, Dietrich CF, et al. Extracorporeal shock wave lithotripsy with a transportable mini-lithotripter and subsequent endoscopic treatment improves clinical outcome in obstructive calcific chronic pancreatitis. *Gastrointest Endosc* 2011; 74: 1294–1299.
686. Pezzilli R, Morselli-Labate AM, Fantini L, et al. Assessment of the quality of life in chronic pancreatitis using SF-12 and EORTC QLQ-C30 questionnaires. *Dig Liver Dis* 2007; 39: 1077–1086.
687. Ellen ME, Leon G, Bouchard G, et al. Barriers, facilitators and views about next steps to implementing supports for evidence-informed decision-making in health systems: A qualitative study. *Implement Sci* 2014; 9: 179. doi: 10.1186/s13012-014-0179-8.
688. Rebours V, Levy P, Bretagne JF, et al. Do guidelines influence medical practice? Changes in management of acute pancreatitis 7 years after the publication of the French guidelines. *Eur J Gastroenterol Hepatol* 2012; 24: 143–148.
689. Greenberg JA, Hsu J, Bawazeer M, et al. Compliance with evidence-based guidelines in acute pancreatitis: An audit of practices in University of Toronto hospitals. *J Gastrointest Surg* 2016; 20: 392–400.
690. Malheiro R, de Monteiro-Soares M, Hassan C, et al. Methodological quality of guidelines in gastroenterology. *Endoscopy* 2014; 46: 513–525.
691. Stawiski K, Strzalka A, Pula A, et al. PancreApp: An innovative approach to computational individualization of nutritional therapy in chronic gastrointestinal disorders. *Stud Health Technol Inform* 2015; 216: 325–328.
692. Rozati H, Shah SP and Shah N. Smartphone applications for the clinical oncologist in UK practice. *J Cancer Educ* 2015; 30: 367–373.
693. Heffernan KJ, Chang S, Maclean ST, et al. Guidelines and recommendations for developing interactive eHealth apps for complex messaging in health promotion. *JMIR Mhealth Uhealth* 2016; 4: e14.
694. Grimshaw J, Eccles M and Tetroe J. Implementing clinical guidelines: Current evidence and future implications. *J Contin Educ Health Prof* 2004; 24: S31–S37.
695. Connor SJ, Lienert AR, Brown LA, et al. Closing the audit loop is necessary to achieve compliance with evidence-based guidelines in the management of acute pancreatitis. *N Z Med J* 2008; 121: 19–25.
